# Supplementary material for: Photoelectron spectroscopy of solvated dicarboxylate and alkali metal ion clusters, M+[O2C(CH2)2CO2]2−[H2O]n(M = Na, K;n= 1–6)
Source: Royal Society of Chemistry journal article supplement (doi:10.1039/c8cp03896a), 2018-01-01
Supplement: c8cp03896a1.pdf [file c8cp03896a1.pdf]

## Electronic Supplementary Information

### Photoelectron spectroscopy of solvated dicarboxylate and alkali metal ion clusters, $M^+[O_2C(CH_2)_2CO_2]^{2-} [H_2O]_n$ ( $M = Na, K, n = 1-6$ )

Ren-Zhong Li,<sup>1,2,a</sup> Shihu H. M. Deng,<sup>2</sup> Gao-Lei Hou,<sup>2</sup> Marat Valiev<sup>3\*</sup> and Xue-Bin Wang,<sup>2\*</sup>

<sup>1</sup>*College of Environmental and Chemical Engineering, Xi'an Polytechnic University, Xi'an, 710048, China*

<sup>2</sup>*Physical Sciences Division, Pacific Northwest National Laboratory, P. O. Box 999, MS K8-88, Richland, Washington 99352, USA*

<sup>3</sup>*Environmental Molecular Sciences Laboratory, Pacific Northwest National Laboratory, 902 Battelle Boulevard, P.O. Box 999, Richland, Washington 99352, United States*

<sup>a</sup>*Visiting scholar supported by PNNL alternate sponsored fellowship*

## Contents

|                   |                                                                                                                                                                         |     |
|-------------------|-------------------------------------------------------------------------------------------------------------------------------------------------------------------------|-----|
| <b>Figure S1</b>  | Optimized structures of $\text{Na}^+(\text{DC}_2^{2-})(\text{H}_2\text{O})_n$ ( $n = 0-1$ ).....                                                                        | S2  |
| <b>Figure S2</b>  | Optimized structures of $\text{Na}^+(\text{DC}_2^{2-})(\text{H}_2\text{O})_2$ .....                                                                                     | S3  |
| <b>Figure S3</b>  | Optimized structures of $\text{Na}^+(\text{DC}_2^{2-})(\text{H}_2\text{O})_3$ .....                                                                                     | S4  |
| <b>Figure S4</b>  | Optimized structures of $\text{Na}^+(\text{DC}_2^{2-})(\text{H}_2\text{O})_4$ .....                                                                                     | S5  |
| <b>Figure S5</b>  | Optimized structures of $\text{Na}^+(\text{DC}_2^{2-})(\text{H}_2\text{O})_5$ .....                                                                                     | S7  |
| <b>Figure S6</b>  | Optimized structures of $\text{Na}^+(\text{DC}_2^{2-})(\text{H}_2\text{O})_6$ .....                                                                                     | S8  |
| <b>Figure S7</b>  | Optimized structures of $\text{Na}^+-\text{DC}_2^{2-}(\text{H}_2\text{O})_7$ clusters.....                                                                              | S9  |
| <b>Figure S8</b>  | Optimized structures of $\text{Na}^+-\text{DC}_2^{2-}(\text{H}_2\text{O})_8$ clusters.....                                                                              | S11 |
| <b>Figure S9</b>  | Optimized structures of $\text{Na}^+-\text{DC}_2^{2-}(\text{H}_2\text{O})_9$ clusters.....                                                                              | S13 |
| <b>Figure S10</b> | Optimized structures of $\text{Na}^+-\text{DC}_2^{2-}(\text{H}_2\text{O})_{10}$ clusters.....                                                                           | S15 |
| <b>Figure S11</b> | Excitation curve of $\text{Na}^+-\text{DC}_2^{2-}(\text{H}_2\text{O})_n$ ( $n = 0-6$ ) with TD-DFT method.....                                                          | S17 |
| <b>Figure S12</b> | Optimized structure of $\text{Na}^+(\text{HDC}_2^-)(\text{OH})^-(\text{H}_2\text{O})_2$ .....                                                                           | S18 |
| <b>Table S1</b>   | Relative energies of the low energy isomers of $\text{Na}^+(\text{DC}_2^{2-})(\text{H}_2\text{O})_n$ ( $n = 0-6$ ) with the zero-point and free energy corrections..... | S19 |
| <b>Table S2</b>   | The Cartesian atomic coordinates of of $\text{Na}^+-\text{DC}_2^{2-}(\text{H}_2\text{O})_0$ .....                                                                       | S20 |
| <b>Table S3</b>   | The Cartesian atomic coordinates of of $\text{Na}^+-\text{DC}_2^{2-}(\text{H}_2\text{O})_1$ .....                                                                       | S21 |
| <b>Table S4</b>   | The Cartesian atomic coordinates of of $\text{Na}^+-\text{DC}_2^{2-}(\text{H}_2\text{O})_2$ .....                                                                       | S23 |
| <b>Table S5</b>   | The Cartesian atomic coordinates of of $\text{Na}^+-\text{DC}_2^{2-}(\text{H}_2\text{O})_3$ .....                                                                       | S26 |
| <b>Table S6</b>   | The Cartesian atomic coordinates of of $\text{Na}^+-\text{DC}_2^{2-}(\text{H}_2\text{O})_4$ .....                                                                       | S32 |
| <b>Table S7</b>   | The Cartesian atomic coordinates of of $\text{Na}^+-\text{DC}_2^{2-}(\text{H}_2\text{O})_5$ .....                                                                       | S42 |
| <b>Table S8</b>   | The Cartesian atomic coordinates of of $\text{Na}^+-\text{DC}_2^{2-}(\text{H}_2\text{O})_6$ .....                                                                       | S49 |

**Table S9** The Cartesian atomic coordinates of of  $\text{Na}^+\text{-DC}_2^{2-}(\text{H}_2\text{O})_7$  .....S57

**Table S10** The Cartesian atomic coordinates of of  $\text{Na}^+\text{-DC}_2^{2-}(\text{H}_2\text{O})_8$  .....S63

**Table S11** The Cartesian atomic coordinates of of  $\text{Na}^+\text{-DC}_2^{2-}(\text{H}_2\text{O})_9$  .....S70

**Table S12** The Cartesian atomic coordinates of of  $\text{Na}^+\text{-DC}_2^{2-}(\text{H}_2\text{O})_{10}$  .....S76

0

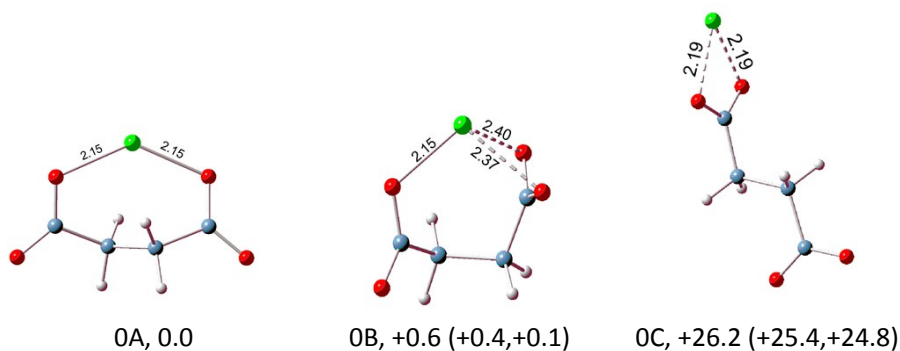

1

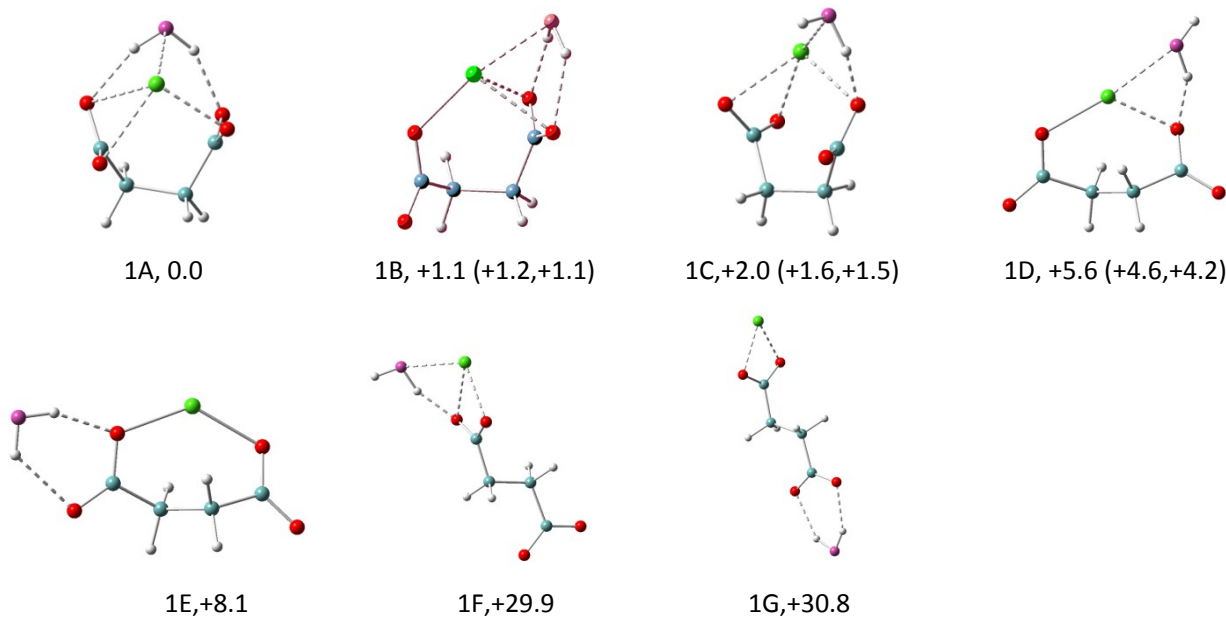

**Figure S1.** B3LYP/6-31++G(d, p) optimized structures of  $\text{Na}^+(\text{DC}_2^{2-})(\text{H}_2\text{O})_n$  ( $n = 0-1$ ). Relative energies (kcal/mol) including zero-point energy and free energy correction (at 100 K) (first and second numbers in parenthesis, respectively) are shown. The lowest isomers in the energy range of 0-6 kcal/mol are real minima based on frequency calculations. Na in green, C in light blue, H in gray, O of  $\text{DC}_2^{2-}$  in red and O of  $\text{H}_2\text{O}$  in purple are used for all the structures.

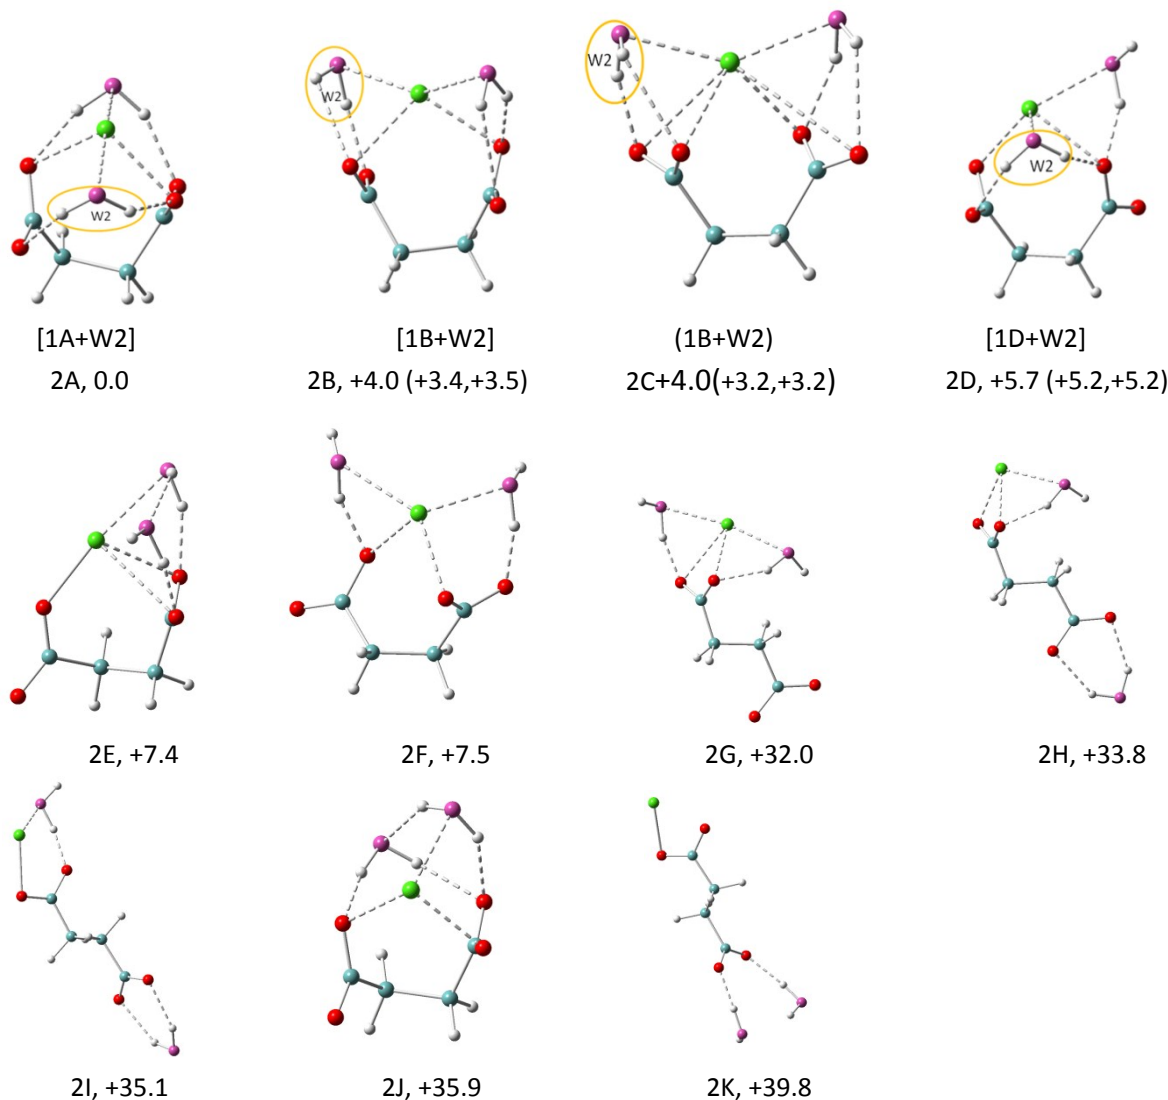

**Figure S2.** B3LYP/6-31++G(d, p) optimized structures of  $\text{Na}^+(\text{DC}_2^{2-})(\text{H}_2\text{O})_2$ . Relative energies (kcal/mol) including zero-point energy and free energy correction (at 100 K) (first and second numbers in parenthesis, respectively) are shown. The lowest isomers in the energy range of 0-6 kcal/mol are real minima based on frequency calculations. The growth pattern of solvated clusters with  $n$  waters from the  $(n-1)$  clusters is noted in brackets with the  $n$ -th water circled. Na in green, C in light blue, H in gray, O of  $\text{DC}_2^{2-}$  in red and O of  $\text{H}_2\text{O}$  in purple are used for all the structures.

3

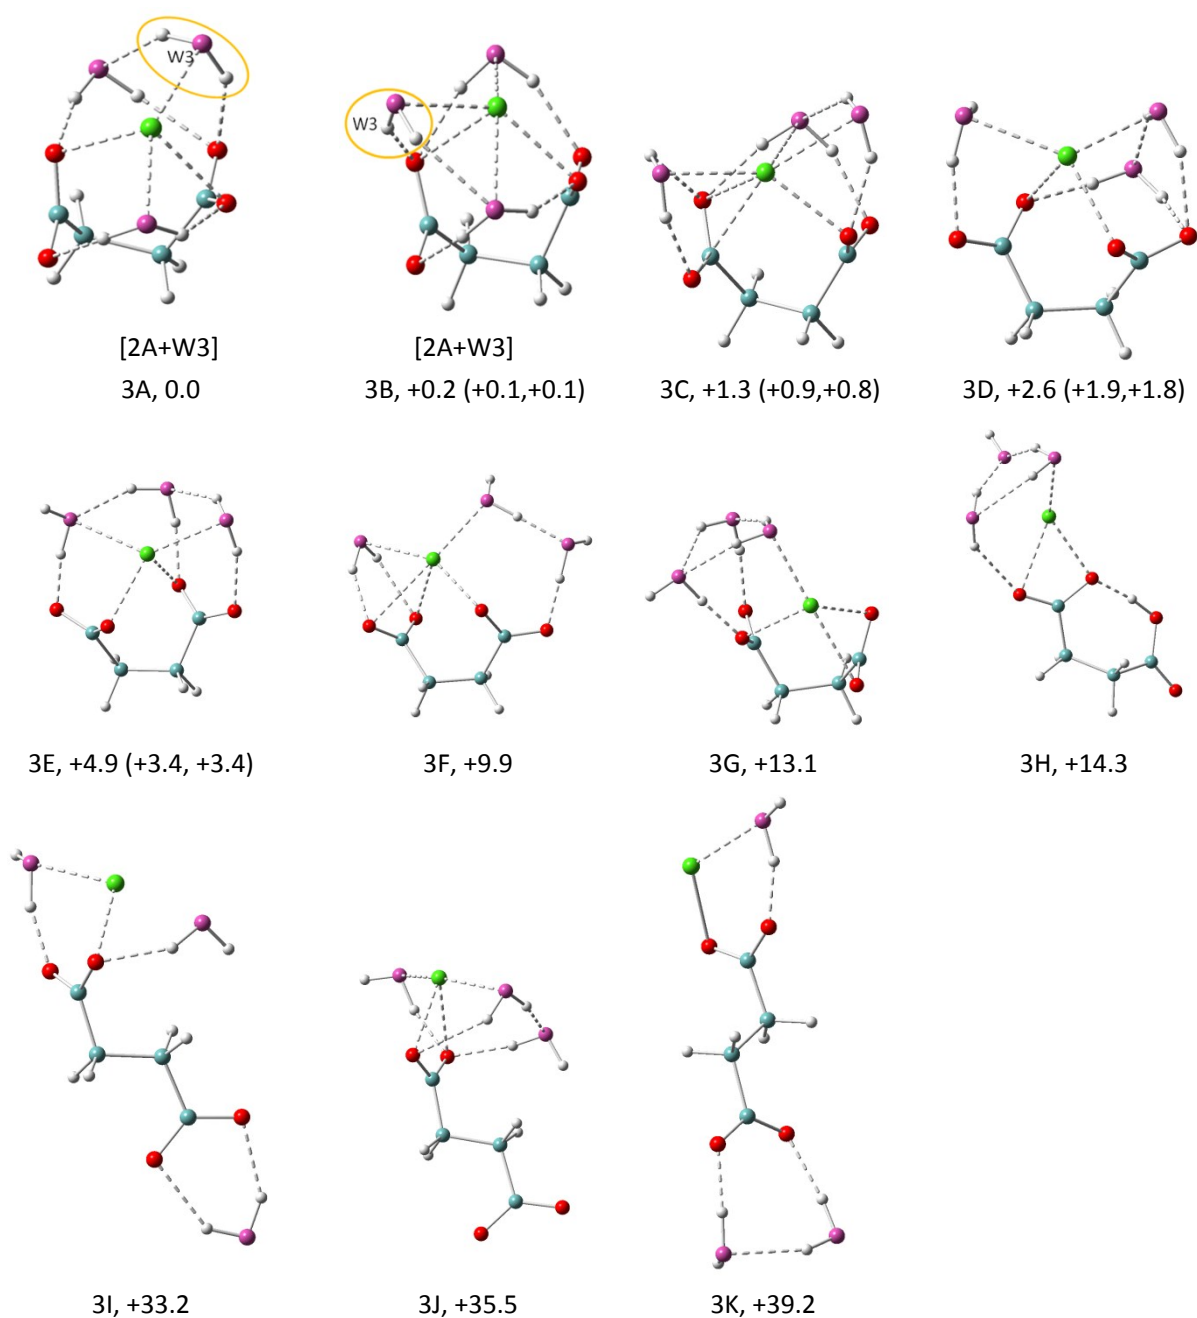

**Figure S3.** B3LYP/6-31++G(d, p) optimized structures of  $\text{Na}^+(\text{DC}_2^{2-})(\text{H}_2\text{O})_3$ . Relative energies (kcal/mol) including zero-point energy and free energy correction (at 100 K) (first and second numbers in parenthesis, respectively) are shown. The lowest isomers in the energy range of 0-6 kcal/mol are real minima based on frequency calculations. The growth pattern of solvated clusters with  $n$  waters from the  $(n-1)$  clusters is noted in brackets with the  $n$ -th water circled. Na in green, C in light blue, H in gray, O of  $\text{DC}_2^{2-}$  in red and O of  $\text{H}_2\text{O}$  in purple are used for all the structures.

4

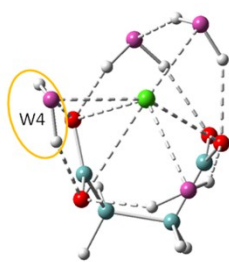

[3A+W4]  
4A, 0.0

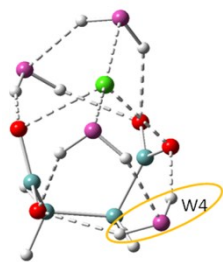

[3A+W4]  
4B, +0.1 (+0.2, +0.3)

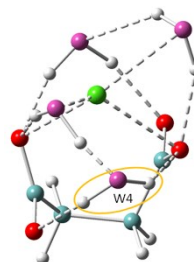

[3C+W4]  
4C, +0.4 (+0.0, +0.0)

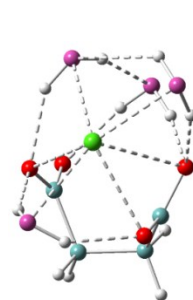

4D, +1.5 (+1.7, +1.7)

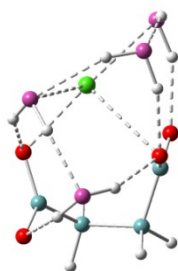

4E, +2.5 (+3.0, +3.1)

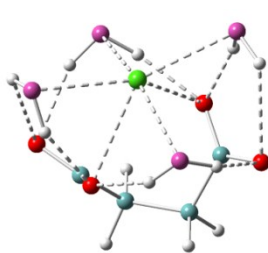

4F, +2.6 (+1.3, +1.2)

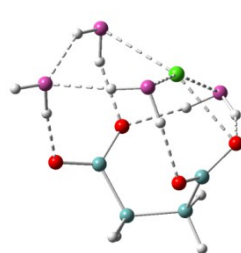

4G, +4.3 (+3.3, +3.4)

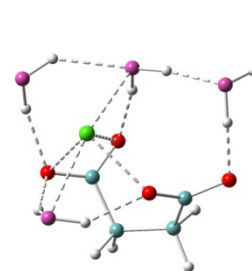

4H, +5.4 (+4.6, +4.6)

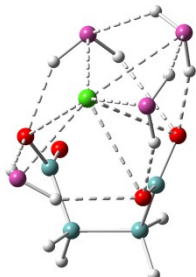

4I, +6.0 (+5.5, +5.5)

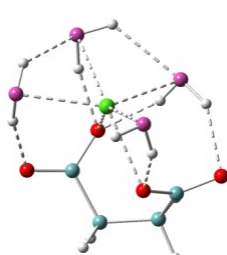

4J, +6.1

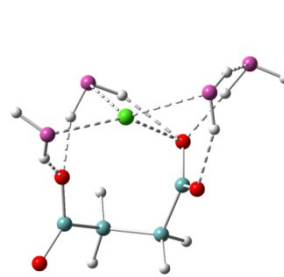

4K, +9.4

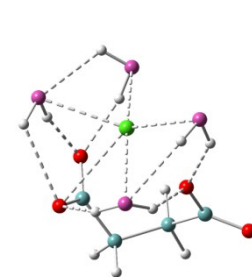

4L, +9.9

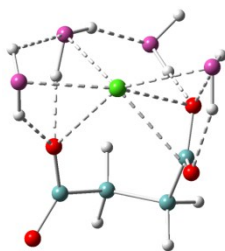

4M, +10.3

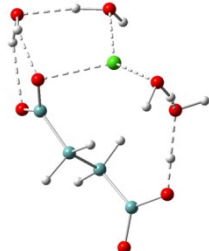

4N, +21.6

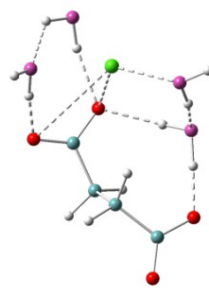

4O, +22.8

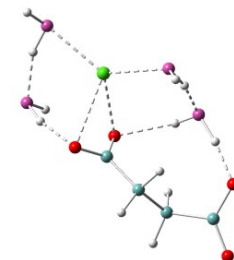

4P, +25.5

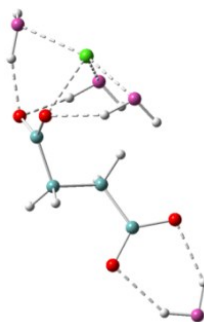

4Q, +32.4

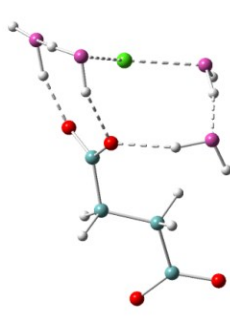

4R, +36.7

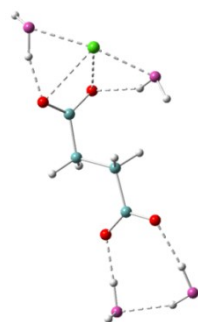

4S, +36.9

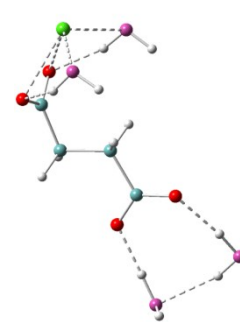

4T, +37.7

**Figure S4.** B3LYP/6-31++G(d, p) optimized structures of  $\text{Na}^+(\text{DC}_2^{2-})(\text{H}_2\text{O})_4$ . Relative energies (kcal/mol) including zero-point energy and free energy correction (at 100 K) (first and second numbers in parenthesis, respectively) are shown. The lowest isomers in the energy range of 0-6 kcal/mol are real minima based on frequency calculations. The growth pattern of solvated clusters with  $n$  waters from the  $(n-1)$  clusters is noted in brackets with the  $n$ -th water circled. Na in green, C in light blue, H in gray, O of  $\text{DC}_2^{2-}$  in red and O of  $\text{H}_2\text{O}$  in purple are used for all the structures.

5

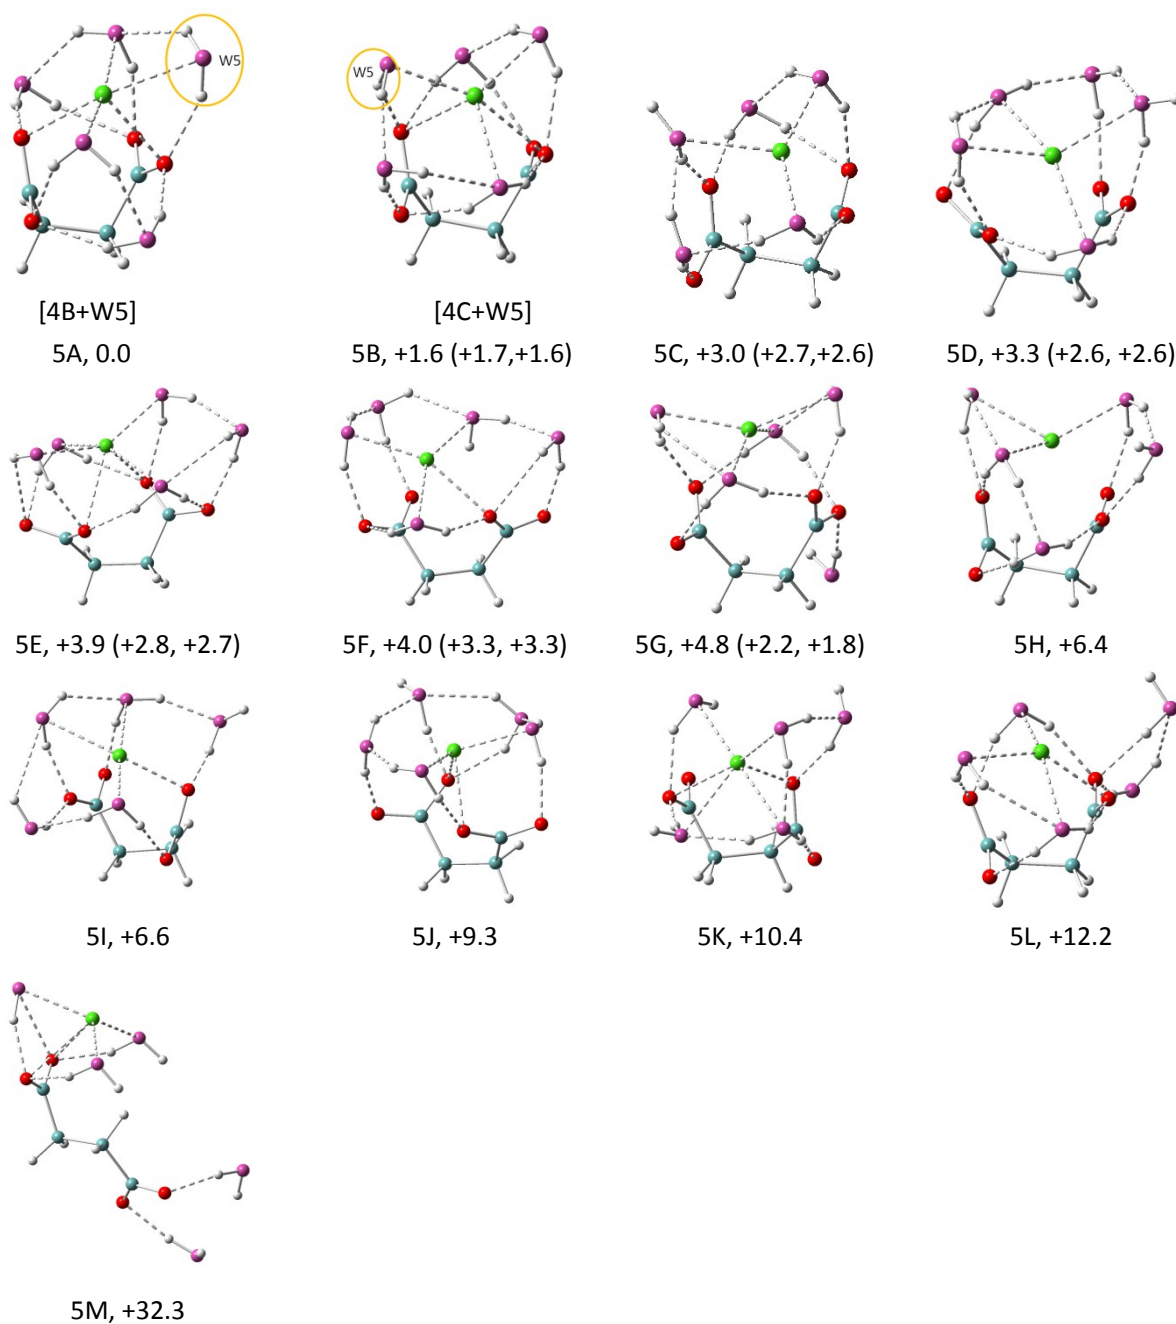

**Figure S5.** B3LYP/6-31++G(d, p) optimized structures of  $\text{Na}^+(\text{DC}_2^{2-})(\text{H}_2\text{O})_5$ . Relative energies (kcal/mol) including zero-point energy and free energy correction (at 100 K) (first and second numbers in parenthesis, respectively) are shown. The lowest isomers in the energy range of 0-6 kcal/mol are real minima based on frequency calculations. The growth pattern of solvated clusters with  $n$  waters from the  $(n-1)$  clusters is noted in brackets with the  $n$ -th water circled. Na in green, C in light blue, H in gray, O of  $\text{DC}_2^{2-}$  in red and O of  $\text{H}_2\text{O}$  in purple are used for all the structures.



6

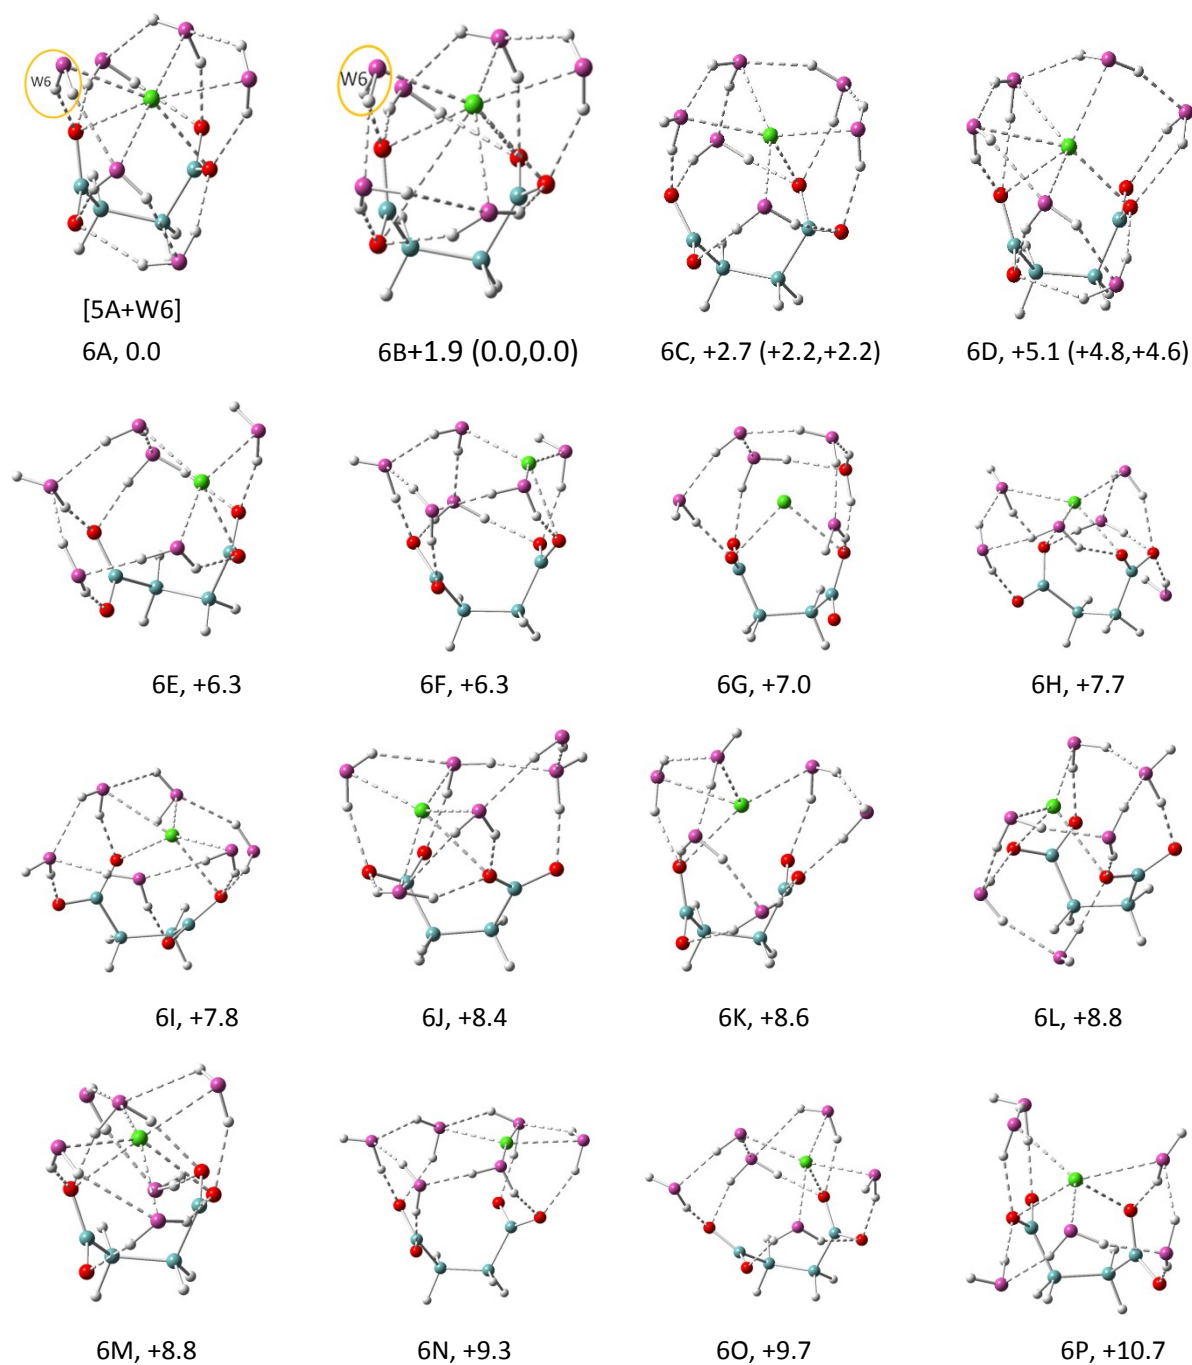

**Figure S6.** B3LYP/6-31++G(d, p) optimized structures of  $\text{Na}^+(\text{DC}_2^{2-})(\text{H}_2\text{O})_6$ . Relative energies (kcal/mol) including zero-point energy and free energy correction (at 100 K) (first and second numbers in parenthesis, respectively) are shown. The lowest isomers in the energy range of 0-6 kcal/mol are real minima based on frequency calculations. The growth pattern of solvated clusters with  $n$  waters from the  $(n-1)$  clusters is noted in brackets with the  $n$ -th water circled. Na in green, C in light blue, H in gray, O of  $\text{DC}_2^{2-}$  in red and O of  $\text{H}_2\text{O}$  in purple are used for all the structures.

n=7

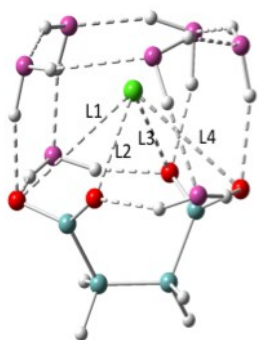

7A, +0.0  
L1=3.30, L2=2.49  
L3=2.45, L4=3.01

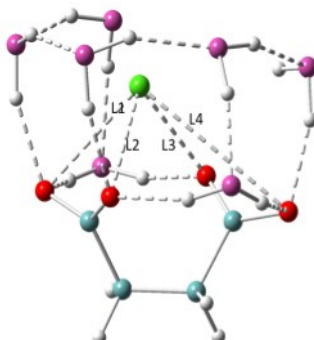

7B, +0.6 (+0.4)  
L1=2.74, L2=2.59  
L3=2.39, L4=3.81

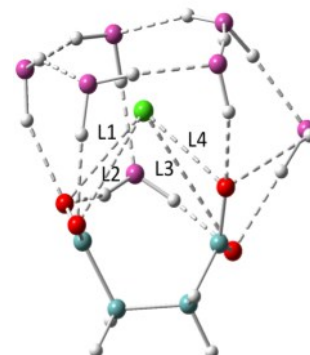

7C, +2.3 (+1.6)  
L1=2.45, L2=3.30  
L3=3.50, L4=2.38

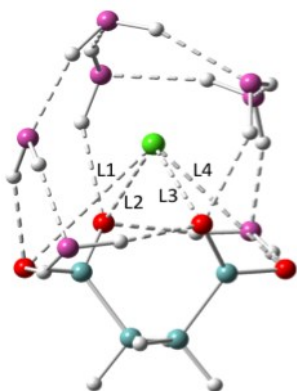

7D, +3.4 (+3.6)  
L1=3.29, L2=2.30  
L3=2.36, L4=3.35

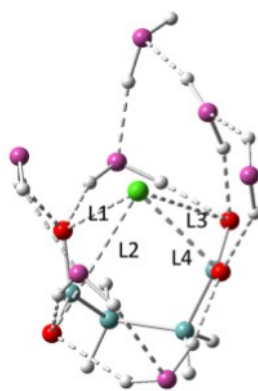

7E, +4.8 (+3.5)  
L1=2.48, L2=3.51  
L3=3.38, L4=2.46

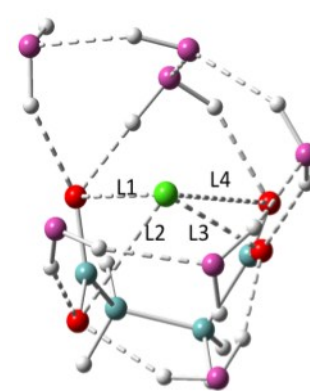

7F, +5.5 (+5.1)  
L1=2.46, L2=2.76  
L3=2.40, L4=4.00

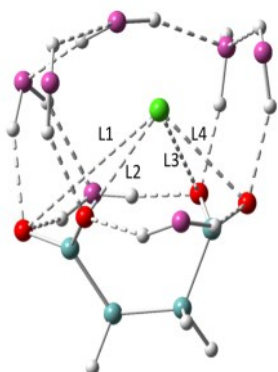

7G, +7.1 (+5.7)  
L1=4.23, L2=2.48  
L3=3.36, L4=2.62

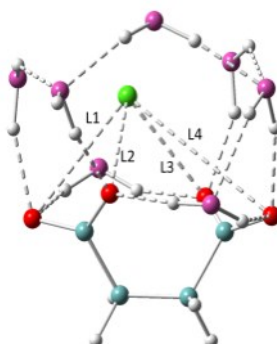

7H, +7.4 (+5.6)  
L1=3.15, L2=2.67  
L3=2.65, L4=4.03

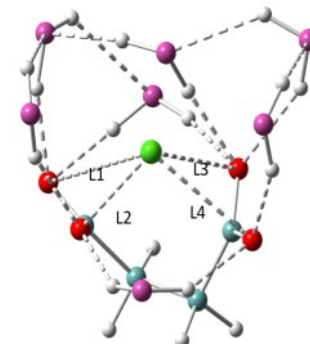

7I, +7.6 (+6.3)  
L1=4.25, L2=2.58  
L3=3.30, L4=2.68

n=7

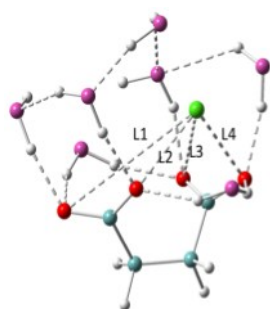

7J, +9.0 (+6.9)  
L1=4.37, L2=2.50  
L3=3.37, L4=2.44

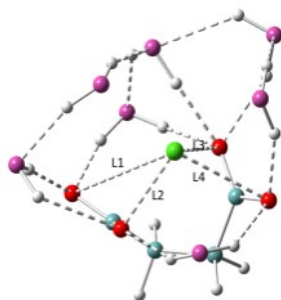

7K, +9.4 (+8.4)  
L1=3.92, L2=2.45  
L3=2.91, L4=2.76

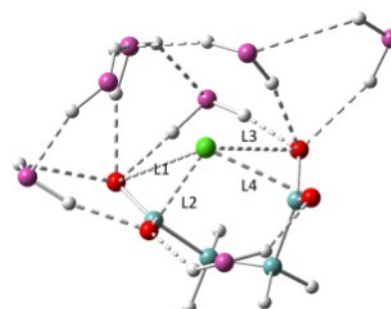

7L, +13.0 (+10.7)  
L1=3.85, L2=2.47  
L3=3.38, L4=2.48

**Figure S7.** Typical low-lying isomers of  $\text{Na}^+\text{-DC}_2^{2-}(\text{H}_2\text{O})_7$  clusters. L1, L2 indicate the distances between  $\text{Na}^+$  and O atoms of the first carboxylate, L3, L4 indicate the distances between  $\text{Na}^+$  and O atoms of the second one. Na in green, C in light blue, H in gray, O of  $\text{DC}_2^{2-}$  in red and O of  $\text{H}_2\text{O}$  in purple are used for all the structures. The bond distances are in angstrom and the energies are in kcal/mol. The relative energies in the parentheses include the zero-point correction.

n=8

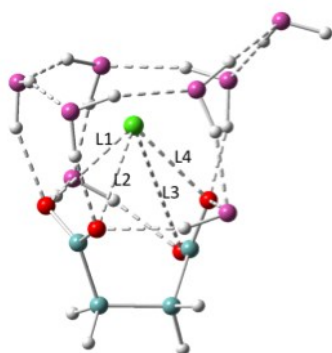

8A, +0.0  
L1=2.56, L2=2.71  
L3=4.00, L4=2.41

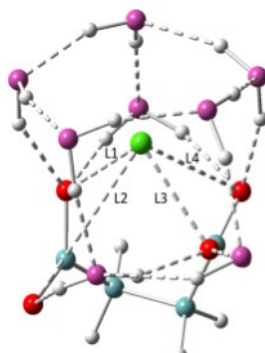

8B, +0.3 (+1.1)  
L1=2.40, L2=2.83  
L3=2.39, L4=3.02

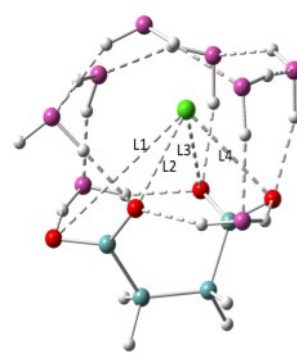

8C, +0.4 (+0.5)  
L1=4.02, L2=2.46  
L3=2.66, L4=2.74

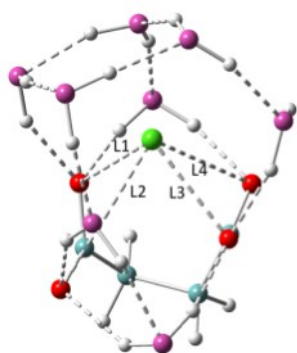

8D, +0.7 (+0.5)  
L1=2.38, L2=3.58  
L3=2.51, L4=3.17

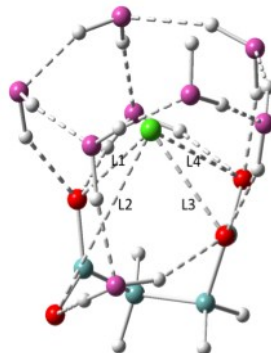

8E, +1.1 (+0.9)  
L1=2.44, L2=4.01  
L3=2.45, L4=2.82

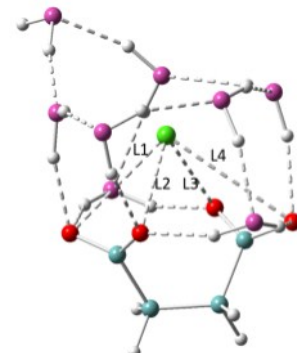

8F, +1.5 (+0.7)  
L1=3.01, L2=2.51  
L3=2.47, L4=3.37

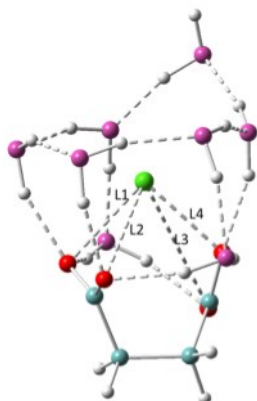

8G, +1.9 (+1.6)  
L1=2.52, L2=2.80  
L3=3.93, L4=2.38

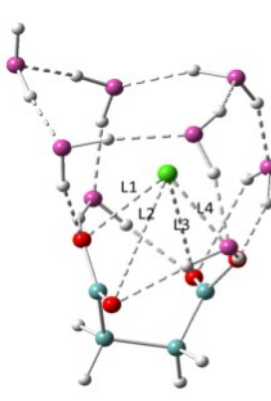

8H, +3.7 (+2.7)  
L1=2.38, L2=3.82  
L3=3.35, L4=2.46

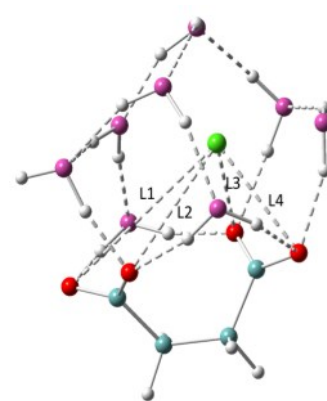

8I, +5.1 (+3.6)  
L1=4.48, L2=3.39  
L3=2.42, L4=2.89

n=8

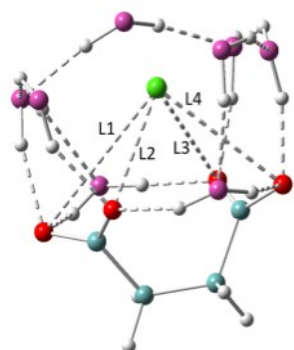

**8J, +6.0 (+4.1)**  
**L1=4.19, L2=2.56**  
**L3=3.75, L4=3.42**

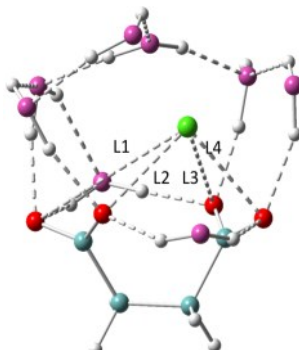

**8K, +6.2 (+4.7)**  
**L1=4.33, L2=2.52**  
**L3=3.48, L4=2.63**

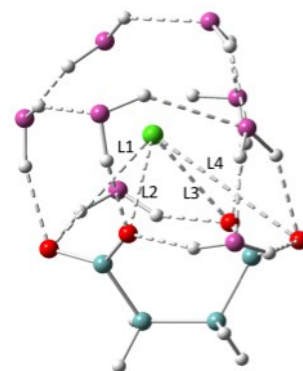

**8L, +7.2 (+5.7)**  
**L1=3.14, L2=2.61**  
**L3=2.56, L4=3.75**

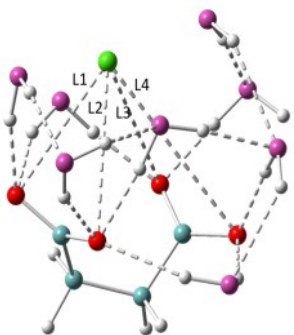

**8M, +10.6 (+8.7)**  
**L1=3.29, L2=3.66**  
**L3=3.59, L4=4.61**

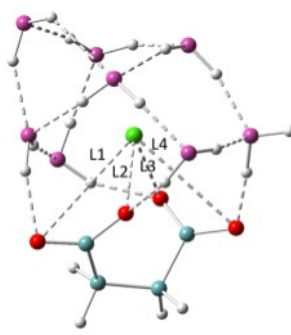

**8N, +12.3 (+10.8)**  
**L1=3.78, L2=2.34**  
**L3=2.31, L4=3.41**

**Figure S8.** Typical low-lying isomers of  $\text{Na}^+\text{-DC}_2^{2-}(\text{H}_2\text{O})_8$  clusters. L1, L2 indicate the distances between  $\text{Na}^+$  and O atoms of the first carboxylate, L3, L4 indicate the distances between  $\text{Na}^+$  and O atoms of the second one. Na in green, C in light blue, H in gray, O of  $\text{DC}_2^{2-}$  in red and O of  $\text{H}_2\text{O}$  in purple are used for all the structures. The relative energies in the parentheses include the zero-point correction. The isomers in bold are solvent separated ion pair (SSIP). The bond distances are in angstrom and the energies are in kcal/mol.

n=9

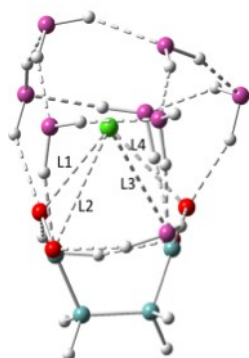

9A, +0.0 kcal/mol  
L1=2.42, L2=3.32  
L3=3.46, L4=2.45

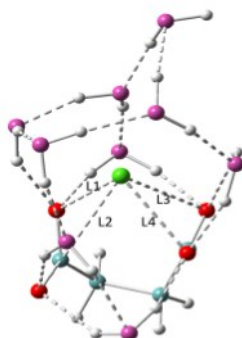

9B, +3.2 (+3.1)  
L1=2.46, L2=3.63  
L3=3.19, L4=2.54

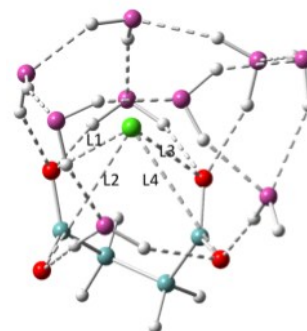

9C, +4.4 (+3.7)  
L1=2.54, L2=3.64  
L3=2.42, L4=3.35

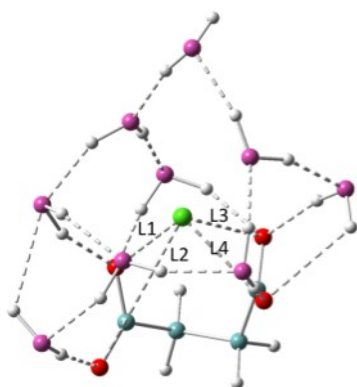

9D, +5.8 (+5.1)  
L1=2.46, L2=4.10  
L3=2.67, L4=2.58

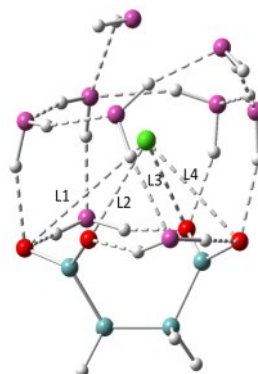

9E, +6.0 (+4.9)  
L1=3.60, L2=4.55  
L3=2.55, L4=2.95

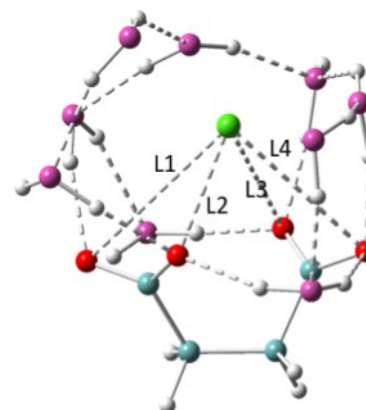

9F, +7.1 (+6.2)  
L1=3.96, L2=2.44  
L3=3.81, L4=3.61

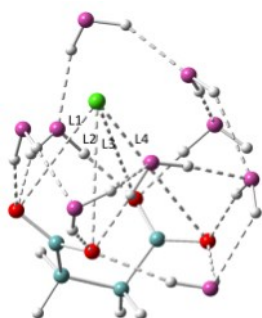

9G, +9.45 (+7.9)  
L1=3.34, L2=3.73  
L3=4.02, L4=4.87

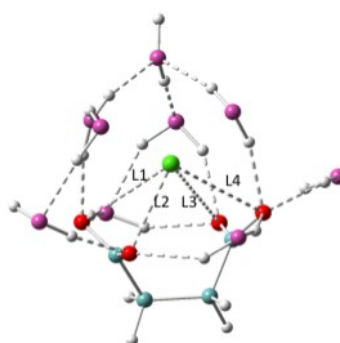

9H, +9.9 (+8.6)  
L1=3.51, L2=2.47  
L3=4.69, L4=3.41

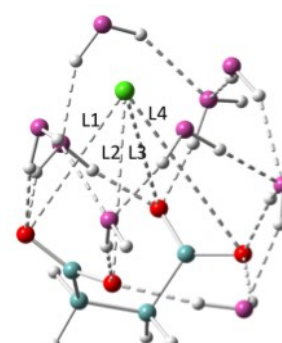

9I, +11.1 (+9.0)  
L1=3.74, L2=4.23  
L3=3.86, L4=4.71

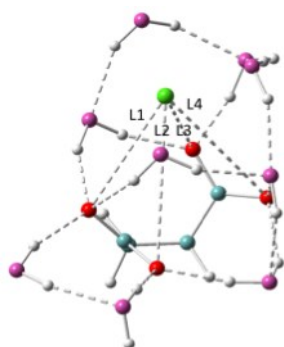

9J, +16.9 (+14.1)  
 L1=3.45, L2=4.38  
 L3=2.57, L4=4.04

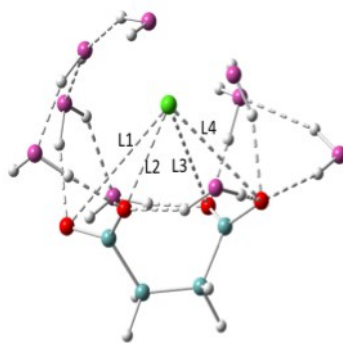

9K, +17.1 (+14.8)  
 L1=4.12, L2=2.50  
 L3=3.96, L4=3.43

**Figure S9.** Typical low-lying isomers of  $\text{Na}^+\text{-DC}_2^{2-}(\text{H}_2\text{O})_9$  clusters. L1, L2 indicate the distances between  $\text{Na}^+$  and O atoms of the first carboxylate, L3, L4 indicate the distances between  $\text{Na}^+$  and O atoms of the second one. Na in green, C in light blue, H in gray, O of  $\text{DC}_2^{2-}$  in red and O of  $\text{H}_2\text{O}$  in purple are used for all the structures. The relative energies in the parentheses include the zero-point correction. The isomers in bold are solvent separated ion pair (SSIP). The bond distances are in angstrom and the energies are in kcal/mol.

n=10

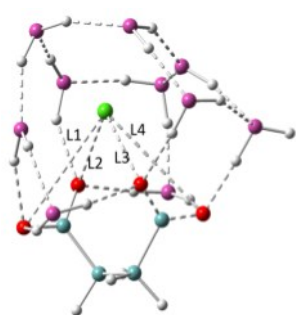

10A, +0.0  
L1=3.63, L2=2.44  
L3=2.46, L4=3.65

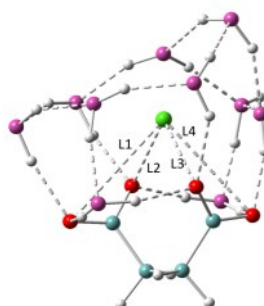

10B, +0.1(+0.5)  
L1=3.60, L2=2.44  
L3=2.42, L4=3.40

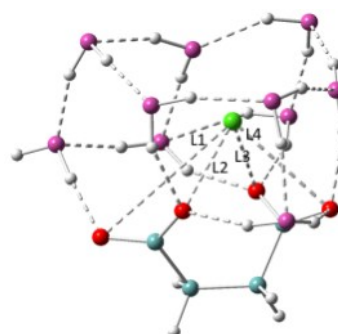

10C, +1.0(+0.8)  
L1=3.99, L2=2.44  
L3=2.50, L4=3.00

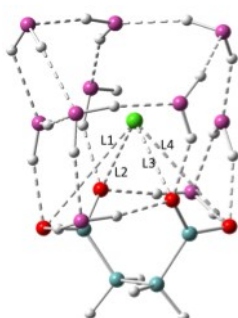

10D, +2.4 (+2.2)  
L1=3.55, L2=2.54  
L3=2.48, L4=3.61

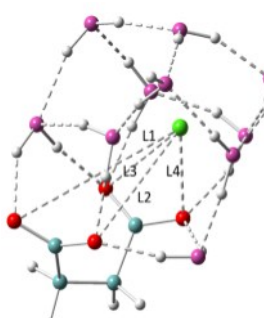

10E, +3.2 (+3.1)  
L1=5.03, L2=3.93  
L3=2.96, L4=2.45

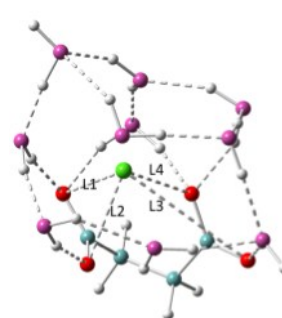

10F, +5.1 (+3.6)  
L1=2.68, L2=2.70  
L3=4.12, L4=2.47

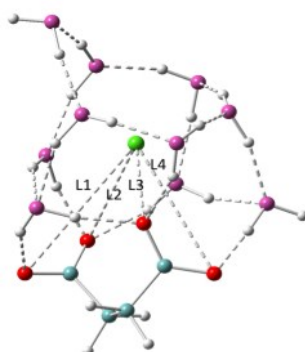

10G, +6.0 (+4.5)  
L1=4.48, L2=3.45  
L3=2.47, L4=4.07

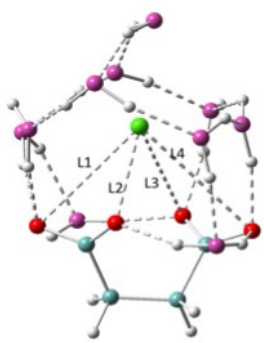

10H, +7.1 (+6.1)  
L1=3.61, L2=2.38  
L3=3.80, L4=3.87

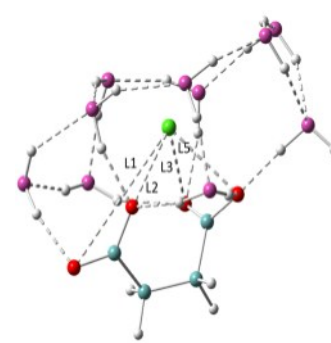

10I, +8.3 (+7.2)  
L1=4.49, L2=2.44  
L3=2.59, L4=2.57



n=10

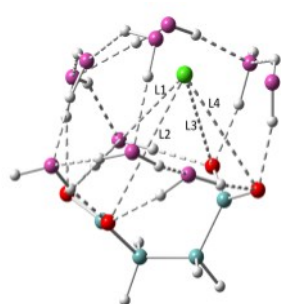

**10J, +9.4 (+7.4)**  
**L1=4.97, L2=4.12**  
**L3=4.18, L4=3.71**

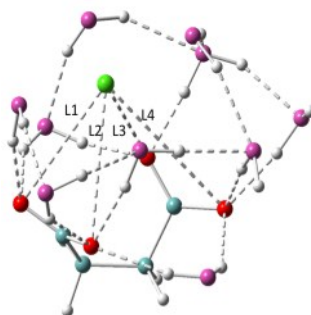

10K, +10.8 (+9.1)  
L1=3.43, L2=3.65  
L3=2.68, L4=4.28

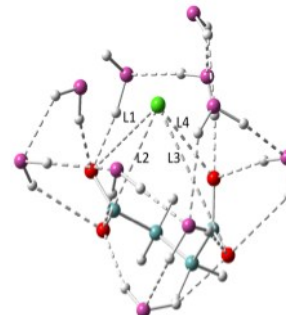

10L, +11.9 (+10.4)  
L1=3.61, L2=3.59  
L3=4.21, L4=2.58

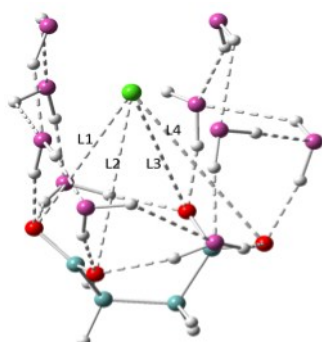

**10M, +13.3 (+11.1)**  
**L1=3.92, L2=4.55**  
**L3=3.84, L4=4.69**

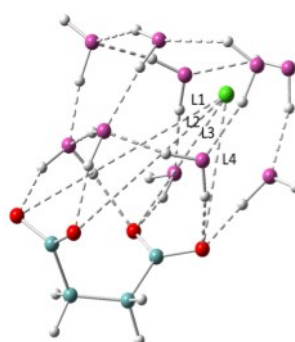

**10N, +22.9 (+19.6)**  
**L1=6.33, L2=5.72**  
**L3=4.34, L4=3.81**

**Figure S10.** Typical low-lying isomers of  $\text{Na}^+\text{-DC}_2^{2-}(\text{H}_2\text{O})_{10}$  clusters. L1, L2 indicate the distances between  $\text{Na}^+$  and O atoms of the first carboxylate, L3, L4 indicate the distances between  $\text{Na}^+$  and O atoms of the second one. Na in green, C in light blue, H in gray, O of  $\text{DC}_2^{2-}$  in red and O of  $\text{H}_2\text{O}$  in purple are used for all the structures. The relative energies in the parentheses include the zero-point correction. The isomers in bold are solvent separated ion pair (SSIP). The bond distances are in angstrom and the energies are in kcal/mol.

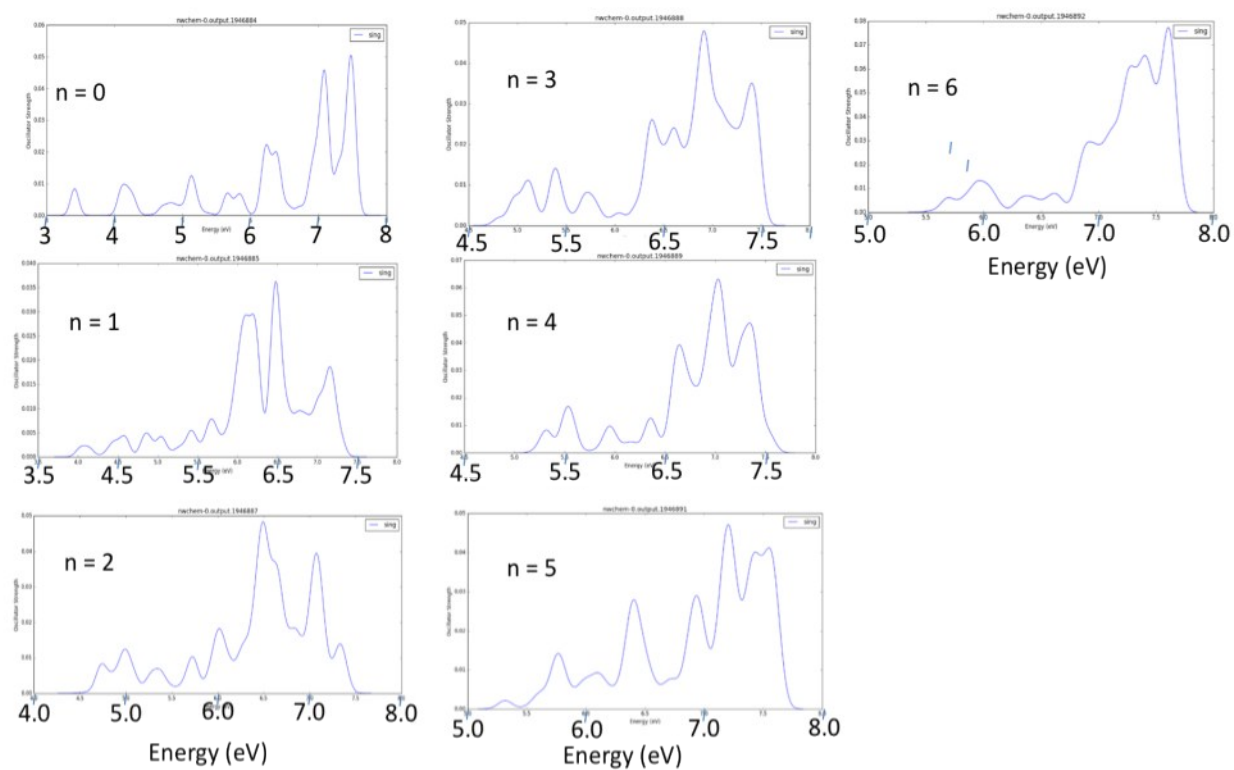

**Figure S11.** Excitation Curves of  $\text{Na}^+(\text{DC}_2)_2(\text{H}_2\text{O})_n$  ( $n = 0-6$ ) with TD-B3LYP method

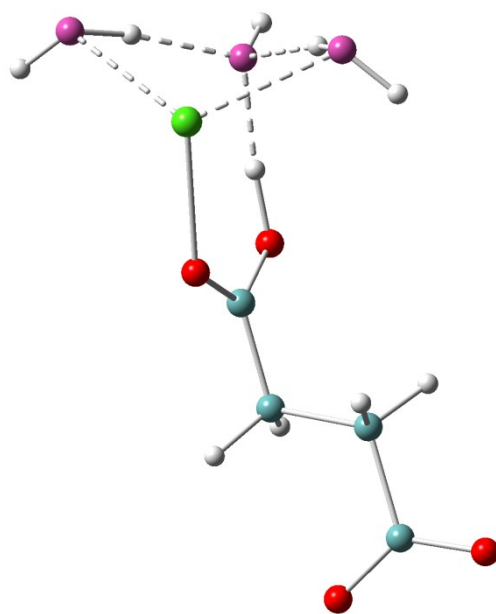

3A'

**Figure S12.** Structure of  $\text{Na}^+(\text{HDC}_2)^-(\text{OH})^-(\text{H}_2\text{O})_2$ . Na in green, C in light blue, H in gray, O of  $\text{DC}_2^{2-}$  in red and O of  $\text{H}_2\text{O}$  in purple are used for all the structures. The structure is real minima based on the frequency calculation.

**Table S1.** Relative energies of the low energy isomers of  $\text{Na}^+(\text{DC}_2^{2-})(\text{H}_2\text{O})_n$  ( $n = 0-6$ ) with the zero-point energy (ZPE) and free energy (at 100 K and 50K) correction.

| Name | ZPE Correction<br>(kcal/mol) | Free Energy Correction<br>(kcal/mol) |       | $\Delta E^*$<br>(kcal/mol) | $\Delta E^*$<br>With ZPE<br>(kcal/mol) | $\Delta E^*$<br>With Free Energy<br>(kcal/mol) |      |
|------|------------------------------|--------------------------------------|-------|----------------------------|----------------------------------------|------------------------------------------------|------|
|      |                              | 100K                                 | 50K   |                            |                                        | 100K                                           | 50K  |
| 0A   | 51.6                         | 46.1                                 | 49.2  | 0.0                        | 0.0                                    | 0.0                                            | 0.0  |
| 0B   | 51.3                         | 45.6                                 | 48.8  | 0.6                        | 0.4                                    | 0.1                                            | 0.2  |
| 0C   | 50.3                         | 44.7                                 | 47.9  | 26.2                       | 25.0                                   | 24.8                                           | 24.9 |
| 1A   | 67.8                         | 62.1                                 | 65.3  | 0.0                        | 0.0                                    | 0.0                                            | 0.0  |
| 1B   | 67.9                         | 62.1                                 | 65.4  | 1.1                        | 1.2                                    | 1.1                                            | 1.1  |
| 1C   | 67.4                         | 61.6                                 | 64.9  | 2.0                        | 1.6                                    | 1.5                                            | 1.6  |
| 1D   | 66.8                         | 60.7                                 | 64.2  | 5.6                        | 4.6                                    | 4.2                                            | 4.5  |
| 2A   | 84.4                         | 78.4                                 | 81.9  | 0.0                        | 0.0                                    | 0.0                                            | 0.0  |
| 2B   | 83.8                         | 77.9                                 | 81.3  | 4.0                        | 3.4                                    | 3.5                                            | 3.5  |
| 2C   | 83.6                         | 77.6                                 | 81.0  | 4.0                        | 3.2                                    | 3.2                                            | 3.2  |
| 2D   | 83.9                         | 77.9                                 | 81.3  | 5.7                        | 5.2                                    | 5.2                                            | 5.2  |
| 3A   | 101.3                        | 95.3                                 | 98.7  | 0.0                        | 0.0                                    | 0.0                                            | 0.0  |
| 3B   | 101.2                        | 95.2                                 | 98.6  | 0.2                        | 0.1                                    | 0.1                                            | 0.1  |
| 3C   | 100.8                        | 94.8                                 | 98.3  | 1.3                        | 0.9                                    | 0.8                                            | 0.8  |
| 3D   | 100.5                        | 94.5                                 | 98.0  | 2.6                        | 1.9                                    | 1.8                                            | 1.9  |
| 3E   | 99.8                         | 93.8                                 | 97.2  | 4.9                        | 3.4                                    | 3.4                                            | 3.4  |
| 4A   | 117.6                        | 111.4                                | 115.0 | 0.0                        | 0.0                                    | 0.0                                            | 0.0  |
| 4B   | 117.7                        | 111.7                                | 115.2 | 0.1                        | 0.2                                    | 0.3                                            | 0.3  |
| 4C   | 117.2                        | 111.0                                | 114.6 | 0.4                        | 0.0                                    | 0.0                                            | 0.0  |
| 4D   | 117.8                        | 111.7                                | 115.2 | 1.5                        | 1.7                                    | 1.7                                            | 1.7  |
| 4E   | 118.1                        | 112.0                                | 115.5 | 2.5                        | 3.0                                    | 3.1                                            | 3.0  |
| 4F   | 116.3                        | 110.1                                | 113.6 | 2.6                        | 1.3                                    | 1.2                                            | 1.2  |
| 4G   | 116.6                        | 110.5                                | 114.0 | 4.3                        | 3.3                                    | 3.4                                            | 3.3  |
| 4H   | 116.8                        | 110.6                                | 114.2 | 5.4                        | 4.6                                    | 4.6                                            | 4.6  |
| 4I   | 117.1                        | 110.9                                | 114.5 | 6.0                        | 5.5                                    | 5.5                                            | 5.5  |
| 5A   | 134.0                        | 127.7                                | 131.3 | 0.0                        | 0.0                                    | 0.0                                            | 0.0  |
| 5B   | 134.1                        | 127.7                                | 131.4 | 1.6                        | 1.7                                    | 1.6                                            | 1.7  |
| 5C   | 133.6                        | 127.3                                | 130.9 | 3.0                        | 2.7                                    | 2.6                                            | 2.6  |
| 5D   | 133.3                        | 127.0                                | 130.7 | 3.3                        | 2.6                                    | 2.6                                            | 2.6  |
| 5E   | 132.9                        | 126.5                                | 130.2 | 3.9                        | 2.8                                    | 2.7                                            | 2.8  |
| 5F   | 133.3                        | 127.0                                | 130.7 | 4.0                        | 3.3                                    | 3.3                                            | 3.3  |
| 5G   | 131.4                        | 124.7                                | 128.6 | 4.8                        | 2.2                                    | 1.8                                            | 2.1  |
| 6A   | 150.1                        | 143.7                                | 147.4 | 0.0                        | 0.0                                    | 0.0                                            | 0.0  |
| 6B   | 143.7                        | 150.2                                | 147.5 | 1.9                        | 0.0                                    | 0.0                                            | 0.0  |
| 6C   | 149.7                        | 143.2                                | 147.0 | 2.7                        | 2.2                                    | 2.2                                            | 2.2  |

|    |       |       |       |     |     |     |     |
|----|-------|-------|-------|-----|-----|-----|-----|
| 6D | 149.8 | 143.2 | 147.0 | 5.1 | 4.7 | 4.6 | 4.7 |
|----|-------|-------|-------|-----|-----|-----|-----|

**Table S2.** The Cartesian atomic coordinates of the typical low-lying isomers of  $\text{Na}^+\text{-DC}_2^{2-}$  using B3LYP exchange-correlation functional with dispersion correction.

| <b>0A</b> |             |             |             | <b>0B</b> |             |             |             |
|-----------|-------------|-------------|-------------|-----------|-------------|-------------|-------------|
| C         | -0.82649805 | -0.67127215 | 0.49759645  | C         | -0.92354306 | -1.27744170 | 0.30627338  |
| C         | 0.00974340  | -0.85453519 | -0.80637983 | H         | -1.82893913 | -0.67618700 | 0.16442615  |
| C         | -0.33894750 | 0.16300908  | -1.93579525 | H         | -1.20457068 | -2.30857596 | 0.55248557  |
| O         | -0.82448919 | -0.27018786 | -2.99598266 | C         | -0.15360911 | -1.29300917 | -1.04400997 |
| C         | 0.00827426  | -0.78181858 | 1.81017407  | H         | 0.78146926  | -1.85208489 | -0.93538450 |
| O         | -0.23636121 | -1.71775176 | 2.59228997  | H         | -0.78866275 | -1.78792711 | -1.79180226 |
| O         | 0.89432396  | 0.14141757  | 1.97017833  | C         | -0.10486570 | -0.71462495 | 1.50349922  |
| O         | -0.07370876 | 1.39430297  | -1.65910984 | O         | 0.54039996  | -1.52868373 | 2.19375042  |
| H         | -1.29105807 | 0.32789356  | 0.48139543  | O         | -0.17031311 | 0.55715404  | 1.69209981  |
| H         | -1.63980398 | -1.40077752 | 0.52405790  | C         | 0.14568470  | 0.13854205  | -1.51082658 |
| H         | 1.07673211  | -0.72778909 | -0.56173781 | O         | -0.85260541 | 0.89100727  | -1.75044139 |
| H         | -0.11161714 | -1.87196780 | -1.18663285 | O         | 1.35040503  | 0.54105241  | -1.46785648 |
| Na        | 0.80539063  | 1.50628949  | 0.30495512  | Na        | 0.24617505  | 1.92718918  | 0.11236370  |
| <b>0C</b> |             |             |             |           |             |             |             |
| C         | -0.02749897 | 0.18077837  | 1.17788030  |           |             |             |             |
| H         | 0.01637450  | 1.27101105  | 1.05317915  |           |             |             |             |
| H         | -1.09039478 | -0.08927093 | 1.23691609  |           |             |             |             |
| C         | 0.62175875  | -0.51162534 | -0.03850235 |           |             |             |             |
| H         | 1.67516552  | -0.22404327 | -0.08726868 |           |             |             |             |
| H         | 0.55919952  | -1.59442038 | 0.09750259  |           |             |             |             |
| C         | 0.63058814  | -0.16843647 | 2.55877532  |           |             |             |             |
| O         | 0.09152882  | 0.40780505  | 3.54381620  |           |             |             |             |
| O         | 1.60459637  | -0.96781065 | 2.54568730  |           |             |             |             |
| C         | -0.08286017 | -0.10984902 | -1.31685939 |           |             |             |             |
| O         | -1.09454052 | -0.79389508 | -1.71419426 |           |             |             |             |
| O         | 0.31718057  | 0.93415563  | -1.94881927 |           |             |             |             |
| Na        | -1.42296313 | 0.72144376  | -3.25715623 |           |             |             |             |

**Table S3.** The Cartesian atomic coordinates of the typical low-lying isomers of  $\text{Na}^+(\text{DC}_2^{2-})(\text{H}_2\text{O})$  using B3LYP exchange-correlation functional with dispersion correction.

| <b>1A</b> |             |             |             | <b>1B</b> |             |             |             |
|-----------|-------------|-------------|-------------|-----------|-------------|-------------|-------------|
| C         | -1.21733302 | -1.48107418 | 0.40941240  | C         | -0.92973471 | -1.53108917 | 0.31457919  |
| C         | -0.60890806 | -1.54969048 | -1.01927969 | C         | -0.40733813 | -1.58061355 | -1.14571830 |
| C         | -0.32373600 | -0.13459784 | -1.55559077 | C         | -0.63735261 | -0.26029194 | -1.93243388 |
| O         | -1.30041093 | 0.66059307  | -1.66999574 | O         | -1.67097680 | -0.17318269 | -2.62388547 |
| C         | -0.32259010 | -0.65072010 | 1.35681637  | C         | -0.10193277 | -0.58110316 | 1.18360338  |
| O         | 0.79938147  | -1.13404484 | 1.67154680  | O         | -0.65446717 | 0.47623722  | 1.62379781  |
| O         | -0.74428188 | 0.50972030  | 1.67594044  | O         | 1.13815040  | -0.85081646 | 1.32322416  |
| O         | 0.89693098  | 0.20065172  | -1.71444797 | O         | 0.27021427  | 0.64024792  | -1.80043680 |
| H         | -2.20802166 | -1.02086668 | 0.35487675  | H         | -1.97878041 | -1.21880467 | 0.32770662  |
| H         | -1.30340309 | -2.50396532 | 0.79960579  | H         | -0.84931196 | -2.53969158 | 0.74276788  |
| H         | 0.32427575  | -2.11956413 | -0.99215184 | H         | 0.66335662  | -1.81294478 | -1.11221292 |
| H         | -1.32683865 | -2.05199081 | -1.68202736 | H         | -0.93792970 | -2.38276728 | -1.67173454 |
| Na        | 0.11842112  | 1.76831504  | 0.05928048  | Na        | 1.07273063  | 1.35216838  | 0.02987343  |
| O         | 2.30241079  | 0.95293680  | 0.56417100  | O         | 1.81107461  | 1.59809856  | 2.30367160  |
| H         | 2.12700274  | 0.52938982  | -0.30278084 | H         | 1.91299950  | 0.62653589  | 2.14124774  |
| H         | 1.94585331  | 0.28208085  | 1.19373809  | H         | 0.84029962  | 1.58383426  | 2.44130757  |
| <b>1C</b> |             |             |             | <b>1D</b> |             |             |             |
| C         | 0.53346905  | -1.90341485 | -0.68724618 | C         | -1.01713909 | -0.91890760 | 0.23024784  |
| H         | 0.05515612  | -1.90479522 | -1.67164111 | C         | -0.28068959 | -1.19922648 | -1.10908403 |
| H         | 1.09814918  | -2.83521743 | -0.54907940 | C         | -0.65314869 | -0.21517291 | -2.25930672 |
| C         | -0.55134330 | -1.82240282 | 0.42171986  | O         | -1.15626606 | -0.68103900 | -3.29815129 |
| H         | -0.05162899 | -1.87323106 | 1.39425667  | C         | -0.13532356 | -1.00777910 | 1.50172084  |
| H         | -1.23190208 | -2.67549827 | 0.30857627  | O         | -0.52164470 | -1.67354757 | 2.47194611  |
| C         | 1.48460316  | -0.70134430 | -0.57572907 | O         | 0.95850673  | -0.31023006 | 1.44083787  |
| O         | 1.37538965  | 0.21488277  | -1.45062468 | O         | -0.37865186 | 1.01967842  | -2.02226765 |
| O         | 2.20295316  | -0.61795642 | 0.46781998  | H         | -1.41679364 | 0.10824096  | 0.20188787  |
| C         | -1.38632501 | -0.52647102 | 0.33959217  | H         | -1.87675630 | -1.58411743 | 0.34609351  |
| O         | -1.00801605 | 0.43067250  | 1.12663453  | H         | 0.80166855  | -1.10772756 | -0.93398580 |
| O         | -2.33159305 | -0.46299765 | -0.46645638 | H         | -0.47269579 | -2.22530681 | -1.43522850 |
| Na        | 0.90699565  | 1.46854453  | 0.47517522  | Na        | 0.70064240  | 1.25366183  | -0.16212710 |
| O         | -1.07329754 | 2.85575910  | 0.25104891  | O         | 1.44025603  | 2.15054942  | 1.96979808  |
| H         | -1.39713173 | 2.83009789  | -0.65811281 | H         | 1.29083761  | 1.15906475  | 2.06133004  |
| H         | -1.32721066 | 1.94428536  | 0.61705618  | H         | 2.24619495  | 2.35751046  | 2.45355071  |

**1E**

|    |             |             |             |
|----|-------------|-------------|-------------|
| C  | -1.06387723 | -0.57216975 | -0.07397596 |
| C  | -0.20467988 | -0.75113368 | -1.36321939 |
| C  | -0.53407790 | 0.28169238  | -2.48557252 |
| O  | -1.00324017 | -0.13823937 | -3.55691637 |
| C  | -0.25619212 | -0.70191743 | 1.23981449  |
| O  | -0.49644663 | -1.64556935 | 2.01438513  |
| O  | 0.63021957  | 0.22299081  | 1.43118760  |
| O  | -0.27132040 | 1.50731116  | -2.18516952 |
| H  | -1.51686039 | 0.43149760  | -0.08669383 |
| H  | -1.88249622 | -1.29569113 | -0.06476501 |
| H  | 0.85897777  | -0.63225916 | -1.10185941 |
| H  | -0.32526302 | -1.76457483 | -1.75338344 |
| Na | 0.60937750  | 1.61006112  | -0.22709212 |
| O  | 1.54298682  | -0.64863890 | 3.93083295  |
| H  | 1.41250653  | -0.15495039 | 3.09270955  |
| H  | 0.88641469  | -1.34839014 | 3.78187736  |

**1G**

|    |             |             |             |
|----|-------------|-------------|-------------|
| C  | -0.26285124 | 0.45048119  | 0.20606135  |
| C  | -1.77958363 | 0.35585054  | 0.53182517  |
| C  | 1.81838228  | -0.60820744 | -0.69572953 |
| C  | 0.34039021  | -0.81550368 | -0.43305949 |
| H  | 0.19524817  | -1.65869981 | 0.24709429  |
| H  | -0.11787281 | 1.31250336  | -0.45781884 |
| H  | 0.26252515  | 0.68056532  | 1.14217980  |
| H  | -0.17930979 | -1.02502028 | -1.37152938 |
| O  | 2.65758841  | -0.86935094 | 0.23847290  |
| O  | -2.28156710 | 1.41351574  | 1.01437562  |
| O  | -2.36430799 | -0.73867255 | 0.29788466  |
| O  | 2.18797660  | -0.12591978 | -1.82549590 |
| Na | 4.22036494  | 0.01506096  | -1.01700221 |
| O  | -4.85147292 | 0.28474357  | 1.25086705  |
| H  | -4.27578793 | -0.40988044 | 0.87302852  |
| H  | -4.15729402 | 0.97518950  | 1.31903404  |

**1F**

|    |             |             |             |
|----|-------------|-------------|-------------|
| C  | 1.14015911  | 0.33285246  | 1.17403070  |
| H  | 1.20534987  | -0.76309282 | 1.18870521  |
| H  | 1.92687139  | 0.68915007  | 0.49561307  |
| C  | -0.24405943 | 0.76847688  | 0.64785062  |
| H  | -1.01012027 | 0.39839071  | 1.33441846  |
| H  | -0.28624842 | 1.86052622  | 0.63010718  |
| C  | 1.47915652  | 0.85327681  | 2.61601793  |
| O  | 0.59798423  | 1.54005266  | 3.19876897  |
| O  | 2.62113197  | 0.51087448  | 3.02773233  |
| C  | -0.48080240 | 0.22171772  | -0.73940298 |
| O  | -0.97630583 | -0.96646414 | -0.85700468 |
| O  | -0.13958252 | 0.91177010  | -1.75635764 |
| Na | -0.51652417 | -0.69711346 | -3.18989082 |
| O  | -2.57567856 | -1.67373312 | -2.76396668 |
| H  | -2.14285955 | -1.44802026 | -1.87609519 |
| H  | -3.49065960 | -1.37724711 | -2.71860487 |



**Table S4.** The Cartesian atomic coordinates of the typical low-lying isomers of  $\text{Na}^+(\text{DC}_2^{2-})(\text{H}_2\text{O})_2$  using B3LYP exchange-correlation functional with dispersion correction.

| <b>2A</b> |             |             |             | <b>2B</b> |             |             |             |
|-----------|-------------|-------------|-------------|-----------|-------------|-------------|-------------|
| C         | -1.07388893 | -1.72529799 | 0.39868518  | C         | 0.27555289  | -1.99736930 | -0.81864117 |
| C         | -0.45032831 | -1.74245796 | -1.02341142 | H         | -0.06230625 | -1.82110022 | -1.84388000 |
| C         | -0.33747138 | -0.30916964 | -1.57160992 | H         | 0.75478784  | -2.98262611 | -0.74897775 |
| O         | -1.40416838 | 0.26273344  | -1.92061222 | C         | -0.94439137 | -1.97145293 | 0.13893190  |
| C         | -0.19517413 | -0.89872140 | 1.35353656  | H         | -0.60421323 | -2.19334665 | 1.15459215  |
| O         | 0.90072084  | -1.40428863 | 1.71471408  | H         | -1.66028232 | -2.73580645 | -0.18861724 |
| O         | -0.59314308 | 0.28081305  | 1.64040766  | C         | 1.29042107  | -0.91551337 | -0.42678562 |
| O         | 0.81776102  | 0.23585704  | -1.54852842 | O         | 1.38864812  | 0.10541117  | -1.17839599 |
| H         | -2.07835990 | -1.29449316 | 0.34157994  | O         | 1.88967091  | -1.05187654 | 0.68630844  |
| H         | -1.13258766 | -2.75632329 | 0.76906919  | C         | -1.64769473 | -0.60074900 | 0.11751410  |
| H         | 0.53975167  | -2.20594352 | -0.97213927 | O         | -1.43685609 | 0.15950267  | 1.13839992  |
| H         | -1.10007633 | -2.32839293 | -1.68512705 | O         | -2.31943361 | -0.28416478 | -0.88824704 |
| Na        | 0.69902793  | 1.58557817  | 0.28680496  | Na        | 0.40434057  | 1.38927635  | 0.54825092  |
| O         | 2.69587511  | 0.31302822  | 0.52069562  | O         | -1.67911801 | 2.54090328  | -0.01619264 |
| H         | 2.32725993  | 0.02559888  | -0.34093658 | H         | -1.91725984 | 2.15378382  | -0.87354748 |
| H         | 2.24301087  | -0.30018389 | 1.14799331  | H         | -1.87834978 | 1.75756267  | 0.56756937  |
| O         | -1.54727636 | 2.28961370  | -0.05896429 | O         | 2.75807491  | 1.46215812  | 0.99949405  |
| H         | -1.61780836 | 1.59174689  | 0.62550695  | H         | 2.58947452  | 0.47722220  | 1.07215711  |
| H         | -1.59664839 | 1.76077732  | -0.89121325 | H         | 2.85102608  | 1.52034594  | 0.03481291  |
| <b>2C</b> |             |             |             | <b>2D</b> |             |             |             |
| C         | -0.77770213 | -1.66163667 | 1.25195166  | C         | -1.42518056 | -1.70716477 | 0.44347686  |
| C         | -0.31861400 | -2.23138798 | -0.09976361 | C         | -0.72138367 | -1.72325998 | -0.93934641 |
| C         | -0.36999713 | -1.22414473 | -1.26749754 | C         | -0.64841944 | -0.32541909 | -1.58133837 |
| O         | 0.37396340  | -1.42643263 | -2.25560482 | O         | -1.56221169 | 0.04793891  | -2.33115155 |
| C         | -0.02635401 | -0.37590258 | 1.63137819  | C         | -0.57825271 | -0.95677767 | 1.48561373  |
| O         | -0.67776069 | 0.53367854  | 2.23728273  | O         | 0.52142340  | -1.48682958 | 1.81582053  |
| O         | 1.17881991  | -0.25776295 | 1.24549209  | O         | -1.00130134 | 0.17795132  | 1.87753891  |
| O         | -1.16474756 | -0.22011375 | -1.13596688 | O         | 0.39056564  | 0.38736326  | -1.25853338 |
| H         | -1.84590115 | -1.42918191 | 1.23742681  | H         | -2.41141440 | -1.24049315 | 0.35159682  |
| H         | -0.60270845 | -2.40863841 | 2.04111711  | H         | -1.54519174 | -2.74667860 | 0.77534860  |
| H         | 0.71288409  | -2.58813112 | -0.03323350 | H         | 0.28719706  | -2.12893911 | -0.80169790 |
| H         | -0.94921087 | -3.09021382 | -0.37428774 | H         | -1.28799010 | -2.37298798 | -1.61597167 |
| Na        | 0.27306292  | 1.39502064  | -0.27525981 | Na        | 0.44580375  | 1.48249703  | 0.83333366  |
| O         | 0.93133734  | 2.59425242  | 1.69340774  | O         | 2.40071367  | 0.13152312  | 0.66311643  |
| H         | 1.69098379  | 1.98984210  | 1.72144905  | H         | 1.93713621  | 0.00545971  | -0.19256084 |
| H         | 0.23971406  | 1.97726540  | 2.07613331  | H         | 1.92874572  | -0.51601507 | 1.24065847  |
| O         | 0.17585905  | 1.46521376  | -2.70812890 | O         | 0.53600092  | 2.96834909  | -1.04810069 |
| H         | -0.58571384 | 0.92038108  | -2.37110940 | H         | 1.36795848  | 3.25978192  | -1.43714828 |
| H         | 0.75263098  | 0.73036964  | -2.97849822 | H         | 0.38987327  | 2.03143294  | -1.39958585 |

**2E**

|    |             |             |             |
|----|-------------|-------------|-------------|
| C  | -0.56058546 | -1.85215168 | 0.90531014  |
| C  | 0.10978282  | -2.28931566 | -0.42119342 |
| C  | -0.45324203 | -1.56000447 | -1.67291774 |
| O  | -1.24974682 | -2.18702466 | -2.39980867 |
| C  | -0.22172715 | -0.41040211 | 1.28129232  |
| O  | -1.18062897 | 0.42063918  | 1.38156980  |
| O  | 1.00626144  | -0.11201003 | 1.41159149  |
| O  | -0.04098372 | -0.35900830 | -1.85028916 |
| H  | -1.64744540 | -1.96234349 | 0.83635347  |
| H  | -0.18967504 | -2.50194666 | 1.71048054  |
| H  | 1.18472864  | -2.08961807 | -0.33432004 |
| H  | -0.04904046 | -3.36567433 | -0.55141982 |
| Na | 0.65208367  | 1.23883309  | -0.63012392 |
| O  | 2.04040264  | 2.37130647  | 1.04452685  |
| H  | 1.75106428  | 1.49897651  | 1.41708298  |
| H  | 1.25669248  | 2.93387517  | 1.15192956  |
| O  | -0.73286537 | 2.81676816  | 0.60721886  |
| H  | -0.94735721 | 1.91406672  | 1.04179420  |
| H  | -1.56943127 | 3.15805399  | 0.27332480  |

**2G**

|    |             |             |             |
|----|-------------|-------------|-------------|
| C  | 0.84793558  | 0.35945554  | 1.28734093  |
| H  | 0.95534093  | -0.72795900 | 1.15766779  |
| H  | 1.49221007  | 0.84567923  | 0.54344038  |
| C  | -0.61845357 | 0.77624792  | 1.04623488  |
| H  | -1.24473544 | 0.39176881  | 1.85334388  |
| H  | -0.67519506 | 1.86941082  | 1.04680587  |
| C  | 1.45107123  | 0.71584373  | 2.69152605  |
| O  | 0.71287232  | 1.34711550  | 3.48837653  |
| O  | 2.63893982  | 0.31672893  | 2.83679775  |
| C  | -1.07171610 | 0.22720100  | -0.28960062 |
| O  | -1.84432571 | -0.79350701 | -0.30831592 |
| O  | -0.57074088 | 0.71946783  | -1.36142662 |
| Na | -0.28922157 | -1.38345704 | -2.25147973 |
| O  | -2.53878043 | -1.83253328 | -2.58490226 |
| H  | -2.46141602 | -1.38403505 | -1.67489684 |
| H  | -3.11091728 | -1.26533587 | -3.11370754 |
| O  | 1.80921394  | -0.48168251 | -1.76590959 |
| H  | 1.18304002  | 0.24799590  | -1.53158827 |
| H  | 2.30234099  | -0.63128800 | -0.94710644 |

**2F**

|    |             |             |             |
|----|-------------|-------------|-------------|
| C  | 0.34233917  | -2.11220717 | -0.53618214 |
| H  | -0.00796035 | -2.09170790 | -1.57350246 |
| H  | 0.87399235  | -3.06438171 | -0.38572203 |
| C  | -0.83721332 | -2.05633349 | 0.45074509  |
| H  | -0.42049596 | -1.97349729 | 1.46370184  |
| H  | -1.41921521 | -2.98341693 | 0.40093803  |
| C  | 1.36934372  | -0.98601360 | -0.35015418 |
| O  | 1.85736705  | -0.46658759 | -1.40831029 |
| O  | 1.64618313  | -0.61156790 | 0.82566031  |
| C  | -1.82192448 | -0.87734349 | 0.28317061  |
| O  | -1.29620504 | 0.25974417  | -0.02908854 |
| O  | -3.03024664 | -1.07993028 | 0.49600722  |
| Na | 0.58757704  | 1.41284814  | 0.45421536  |
| O  | -1.47426600 | 2.60981945  | 0.93424900  |
| H  | -2.00796073 | 3.23889809  | 0.43833769  |
| H  | -1.70289068 | 1.69116321  | 0.56852445  |
| O  | 2.26106992  | 2.06835991  | -1.05439482 |
| H  | 2.27850345  | 1.05853241  | -1.20205895 |
| H  | 1.98505061  | 2.43243571  | -1.90321024 |

**2H**

|    |             |             |             |
|----|-------------|-------------|-------------|
| C  | -0.51886519 | 0.09935002  | 0.16545508  |
| C  | -2.02224071 | 0.06815738  | 0.56107581  |
| C  | 1.52920700  | -0.99676680 | -0.67446909 |
| C  | 0.05001965  | -1.20707107 | -0.42787454 |
| H  | -0.11322572 | -2.02731792 | 0.27415783  |
| H  | -0.39613700 | 0.91703185  | -0.55742772 |
| H  | 0.04592948  | 0.37615240  | 1.06728472  |
| H  | -0.47014635 | -1.42788909 | -1.36432625 |
| O  | 2.37595464  | -1.39155305 | 0.18900883  |
| O  | -2.45179885 | 1.15734642  | 1.04337886  |
| O  | -2.65683740 | -1.00354763 | 0.37177471  |
| O  | 1.87874098  | -0.28996991 | -1.69559329 |
| Na | 3.68955802  | 0.32247784  | -0.41224024 |
| O  | 2.24791203  | 2.16479497  | -0.71434303 |
| H  | 1.83939484  | 1.42518827  | -1.23740083 |
| H  | 1.55130219  | 2.44447302  | -0.10589408 |
| O  | -5.05334272 | 0.14587475  | 1.45804335  |
| H  | -4.54514806 | -0.58857033 | 1.06257404  |
| H  | -4.32366926 | 0.80155602  | 1.46182976  |

**2I**

|    |             |             |             |
|----|-------------|-------------|-------------|
| C  | -0.91023517 | 0.47382784  | 0.32742262  |
| C  | -2.44498986 | 0.27685620  | 0.47943442  |
| C  | 1.26528865  | -0.25580892 | -0.66261772 |
| C  | -0.22313172 | -0.52448883 | -0.62573546 |
| H  | -0.41591622 | -1.53971955 | -0.26976869 |
| H  | -0.73791061 | 1.50246283  | -0.01471101 |
| H  | -0.46734654 | 0.39464195  | 1.32892346  |
| H  | -0.64587911 | -0.41470982 | -1.62762740 |
| O  | 1.99744033  | -0.78582503 | 0.25201860  |
| O  | -3.01687643 | 1.14497821  | 1.20162491  |
| O  | -2.97108413 | -0.70882865 | -0.10824565 |
| O  | 1.73481568  | 0.53479809  | -1.54673285 |
| Na | 3.69758961  | 0.78812370  | -0.65520408 |
| O  | 4.55742012  | -0.99529227 | 0.45051873  |
| H  | 3.54928069  | -1.11685282 | 0.45622341  |
| H  | 4.90878267  | -1.38155152 | 1.25848477  |
| O  | -5.56220908 | -0.02112783 | 0.87525796  |
| H  | -4.89877871 | 0.62403950  | 1.20131871  |
| H  | -4.93642057 | -0.57368929 | 0.36602433  |

**2K**

|    |             |             |             |
|----|-------------|-------------|-------------|
| C  | 0.26776692  | 0.40414754  | 0.26043507  |
| C  | -1.27187459 | 0.39299120  | 0.41338236  |
| C  | 2.33892782  | -0.57149763 | -0.74618894 |
| C  | 0.83077637  | -0.69928810 | -0.65412773 |
| H  | 0.56368850  | -1.67676367 | -0.24465029 |
| H  | 0.55436598  | 1.39130236  | -0.12467999 |
| H  | 0.70154595  | 0.32048343  | 1.26494186  |
| H  | 0.38608656  | -0.59869205 | -1.64744007 |
| O  | 3.06829172  | -1.20390927 | 0.09665691  |
| O  | -1.72972145 | 1.27584346  | 1.20155123  |
| O  | -1.92901743 | -0.45835684 | -0.24289512 |
| O  | 2.84039765  | 0.20834548  | -1.63139606 |
| Na | 4.80690254  | -0.14569983 | -0.72435257 |
| O  | -4.37491618 | 1.66512437  | 1.20250282  |
| H  | -3.38208815 | 1.52148154  | 1.25188189  |
| H  | -4.56861183 | 1.51345187  | 0.26875545  |
| O  | -4.44059666 | -1.23577171 | 0.70553905  |
| H  | -4.62649951 | -0.42087739 | 1.20061058  |
| H  | -3.54830456 | -1.04305752 | 0.33163373  |

**2J**

|    |          |          |          |
|----|----------|----------|----------|
| C  | 0.31730  | -1.94220 | -0.77031 |
| H  | 1.32255  | -2.12474 | -1.16209 |
| H  | -0.34291 | -2.77489 | -1.04471 |
| C  | 0.38546  | -1.86012 | 0.77941  |
| H  | -0.62872 | -1.74446 | 1.17567  |
| H  | 0.81218  | -2.79789 | 1.15392  |
| C  | -0.23204 | -0.64353 | -1.37798 |
| O  | -1.47447 | -0.40617 | -1.24670 |
| O  | 0.60252  | 0.15999  | -1.89438 |
| C  | 1.27949  | -0.69254 | 1.25433  |
| O  | 2.50918  | -0.86065 | 1.29447  |
| O  | 0.65956  | 0.41039  | 1.53423  |
| Na | 0.53230  | 1.68182  | -0.24364 |
| O  | -2.04855 | 0.48195  | 1.37959  |
| H  | -1.07884 | 0.42203  | 1.59014  |
| H  | -2.10767 | -0.06377 | 0.57038  |
| O  | -1.65172 | 2.32153  | -0.68818 |
| H  | -1.67295 | 1.49088  | -1.22245 |
| H  | -1.97863 | 1.97892  | 0.17217  |

**Table S5.** The Cartesian atomic coordinates of the typical low-lying isomers of  $\text{Na}^+(\text{DC}_2^{2-})(\text{H}_2\text{O})_3$  using B3LYP exchange-correlation functional with dispersion correction.

| <b>3A</b> |          |          |          | <b>3B</b> |             |             |             |
|-----------|----------|----------|----------|-----------|-------------|-------------|-------------|
| C         | 0.05156  | -2.11766 | -0.72554 | C         | -0.89217609 | -2.04493880 | 0.63715316  |
| H         | 1.05630  | -2.30990 | -1.11378 | H         | -1.93014354 | -1.71639990 | 0.52328967  |
| H         | -0.61361 | -2.94668 | -0.99658 | H         | -0.87104177 | -3.05348919 | 1.06690285  |
| C         | 0.12130  | -2.02257 | 0.82359  | C         | -0.21462316 | -2.08890407 | -0.75877695 |
| H         | -0.89069 | -1.93180 | 1.22975  | H         | 0.82817083  | -2.39833323 | -0.63877303 |
| H         | 0.58641  | -2.93811 | 1.20712  | H         | -0.74554188 | -2.81604219 | -1.38463835 |
| C         | -0.48977 | -0.81743 | -1.34134 | C         | -0.12249157 | -1.09470884 | 1.56969731  |
| O         | -1.72768 | -0.57660 | -1.22340 | O         | 1.00177980  | -1.47816292 | 1.98124262  |
| O         | 0.34939  | -0.02198 | -1.86885 | O         | -0.63548533 | 0.05627086  | 1.79219736  |
| C         | 0.97290  | -0.81182 | 1.24032  | C         | -0.29297585 | -0.71499302 | -1.44012004 |
| O         | 2.21928  | -0.90349 | 1.12802  | O         | -1.41046724 | -0.34230745 | -1.87756302 |
| O         | 0.33867  | 0.24803  | 1.58449  | O         | 0.77202073  | -0.00101463 | -1.45037202 |
| Na        | 0.41197  | 1.62227  | -0.20721 | Na        | 0.55919306  | 1.46854997  | 0.46298320  |
| O         | 2.67346  | 1.08138  | -0.74828 | O         | 0.32312978  | 2.71442596  | -1.58812174 |
| H         | 2.75301  | 0.48443  | 0.03183  | H         | 0.47396554  | 1.77538268  | -1.85929659 |
| H         | 2.15821  | 0.53041  | -1.37169 | H         | -0.61049184 | 2.71620923  | -1.32175286 |
| O         | -2.38601 | 0.27454  | 1.40327  | O         | -1.95045634 | 1.62394469  | -0.01469439 |
| H         | -1.42204 | 0.23375  | 1.62651  | H         | -1.96700504 | 1.01420835  | -0.78624132 |
| H         | -2.41949 | -0.24559 | 0.57655  | H         | -1.75963298 | 1.01063265  | 0.73303220  |
| O         | -1.81912 | 2.15586  | -0.61049 | O         | 2.62645063  | 0.31556868  | 0.65305947  |
| H         | -1.85152 | 1.34199  | -1.16549 | H         | 2.27971754  | -0.01436596 | -0.20073725 |
| H         | -2.18543 | 1.80764  | 0.23008  | H         | 2.24635646  | -0.32132910 | 1.30155710  |

**3C**

|    |             |             |             |
|----|-------------|-------------|-------------|
| C  | -1.10443548 | -1.92210608 | 0.79397882  |
| H  | -2.10956064 | -1.49075726 | 0.80554400  |
| H  | -1.09871164 | -2.85807917 | 1.36678394  |
| C  | -0.69156052 | -2.23066288 | -0.66898171 |
| H  | 0.29686279  | -2.69857633 | -0.67200602 |
| H  | -1.43135354 | -2.91480199 | -1.10224470 |
| C  | -0.11919952 | -0.94348046 | 1.44394984  |
| O  | 1.06915498  | -1.33924909 | 1.62289308  |
| O  | -0.52163444 | 0.24448816  | 1.68634337  |
| C  | -0.66059566 | -0.93678702 | -1.50064227 |
| O  | -1.76197308 | -0.39787473 | -1.78543048 |
| O  | 0.49240135  | -0.45559212 | -1.76730244 |
| Na | 1.07179262  | 0.97636754  | -0.05340368 |
| O  | 0.89978149  | 2.22009710  | -2.14598466 |
| H  | 0.08986934  | 2.51558552  | -1.69453690 |
| H  | 0.69434003  | 1.27167584  | -2.33824827 |
| O  | 2.25617106  | 1.04209111  | 2.03604676  |
| H  | 2.03210903  | 0.07137524  | 1.99007335  |
| H  | 1.43186218  | 1.37200150  | 2.42718579  |
| O  | -1.33005976 | 1.91304857  | -0.34757350 |
| H  | -1.29254276 | 1.40269993  | 0.49044655  |
| H  | -1.64048216 | 1.23500300  | -0.99353583 |

**3D**

|    |             |             |             |
|----|-------------|-------------|-------------|
| C  | 0.32028208  | -2.19855480 | -0.24550827 |
| H  | 0.13723104  | -2.14323037 | -1.32286998 |
| H  | 0.75528121  | -3.18834687 | -0.04457992 |
| C  | -0.99161154 | -2.04409709 | 0.53836907  |
| H  | -0.84816559 | -2.30232590 | 1.59075406  |
| H  | -1.74991449 | -2.72604840 | 0.12566552  |
| C  | 1.38147881  | -1.13490188 | 0.10944682  |
| O  | 2.22190719  | -0.83887006 | -0.79547589 |
| O  | 1.31827634  | -0.59203724 | 1.25060908  |
| C  | -1.56142731 | -0.61847055 | 0.49832405  |
| O  | -1.32576049 | 0.10241380  | -0.52963328 |
| O  | -2.18917944 | -0.20681920 | 1.51544863  |
| Na | 0.26696642  | 1.36972700  | 0.79119308  |
| O  | -1.83726479 | 2.42809594  | 1.20697503  |
| H  | -2.12182728 | 1.50165682  | 1.46004145  |
| H  | -2.00385519 | 2.39912932  | 0.25304463  |
| O  | 1.84613894  | 1.91312548  | -0.83720102 |
| H  | 2.29923647  | 1.05204953  | -0.67709155 |
| H  | 1.32281792  | 1.69060239  | -1.63487386 |
| O  | 0.42185678  | 0.27294897  | -2.67232475 |
| H  | -0.29763218 | 0.12972803  | -2.01651935 |
| H  | 1.13914786  | -0.29170380 | -2.31930900 |

| <b>3E</b> |             |             |             | <b>3F</b> |             |             |             |
|-----------|-------------|-------------|-------------|-----------|-------------|-------------|-------------|
| C         | -0.45799270 | -2.05706117 | 1.43799508  | C         | -0.02043066 | -2.02665304 | -1.24819155 |
| C         | -0.39519372 | -2.45274603 | -0.04962704 | H         | -0.26059234 | -1.53555212 | -2.19703756 |
| C         | -0.62479674 | -1.25692852 | -0.99234403 | H         | 0.38533820  | -3.01826560 | -1.49300939 |
| O         | -0.03257873 | -1.25505140 | -2.10782414 | C         | -1.28844682 | -2.15853520 | -0.39523694 |
| C         | 0.40466210  | -0.82007093 | 1.74894786  | H         | -1.08405783 | -2.69966201 | 0.53316859  |
| O         | -0.03263084 | -0.00272609 | 2.61966634  | H         | -2.04486386 | -2.72594265 | -0.95837065 |
| O         | 1.46852342  | -0.66263818 | 1.07939162  | C         | 1.11233483  | -1.20539333 | -0.60281512 |
| O         | -1.34927695 | -0.30920628 | -0.54429020 | O         | 2.13461193  | -0.99576721 | -1.33045924 |
| H         | -1.48415277 | -1.82772136 | 1.73629658  | O         | 0.96799696  | -0.77835417 | 0.57586761  |
| H         | -0.10193172 | -2.89579873 | 2.05477031  | C         | -1.89759731 | -0.79840849 | -0.02100870 |
| H         | 0.57990371  | -2.88013420 | -0.29816533 | O         | -1.80758884 | 0.14430150  | -0.86867721 |
| H         | -1.16041014 | -3.21402842 | -0.26244714 | O         | -2.39262270 | -0.67520484 | 1.14478867  |
| Na        | 0.84579722  | 0.92415740  | -0.39181298 | Na        | -0.29750363 | 1.00253918  | 0.96312979  |
| O         | 0.31349920  | 2.31125325  | 1.51196380  | O         | -2.51392673 | 2.02408095  | 1.11001706  |
| H         | 0.99753431  | 2.81779107  | 1.96186460  | H         | -2.69800991 | 1.08777088  | 1.38306946  |
| H         | 0.20392971  | 1.44803919  | 2.05060951  | H         | -2.47253047 | 1.85859198  | 0.14842030  |
| O         | 0.79215117  | 1.26643730  | -2.73578018 | O         | 3.35202796  | 1.14070263  | -0.54002857 |
| H         | 0.04119055  | 1.83133834  | -2.48049348 | H         | 2.91496079  | 0.23898820  | -0.76585361 |
| H         | 0.42690460  | 0.34201388  | -2.70778562 | H         | 3.57560113  | 1.51289898  | -1.40116185 |
| O         | -1.24050064 | 2.32171272  | -0.97468429 | O         | 1.45868720  | 2.49085828  | 0.79119835  |
| H         | -1.47274854 | 1.35786687  | -0.89332524 | H         | 2.18115084  | 1.98354937  | 0.31875379  |
| H         | -0.98823362 | 2.58965940  | -0.07485505 | H         | 1.38975547  | 3.34011794  | 0.34305885  |

**3G**

|    |             |             |             |
|----|-------------|-------------|-------------|
| O  | 2.89897954  | 0.90389866  | 0.67223724  |
| H  | 3.18010254  | 1.47640278  | 1.39395335  |
| C  | -2.85392894 | 0.21276212  | -0.11002572 |
| H  | -3.84227681 | 0.27357089  | 0.36401332  |
| H  | -2.95422219 | 0.33376700  | -1.19273385 |
| C  | -1.96944668 | 1.35089567  | 0.46740258  |
| H  | -2.38781430 | 2.31817135  | 0.16245572  |
| H  | -1.97012841 | 1.26981320  | 1.55802825  |
| C  | -2.20047058 | -1.14631736 | 0.19866331  |
| O  | -1.65920489 | -1.75676879 | -0.77533737 |
| O  | -2.09946906 | -1.48442283 | 1.41538339  |
| C  | -0.52109566 | 1.27341473  | -0.03555442 |
| O  | 0.33318927  | 0.74639547  | 0.77558324  |
| O  | -0.25122073 | 1.68633644  | -1.18623189 |
| H  | 1.87754234  | 0.91851992  | 0.67258032  |
| O  | 2.05713218  | 0.45548024  | -2.05219314 |
| H  | 2.65549810  | 0.90545013  | -1.43462032 |
| H  | 1.18264760  | 0.87840993  | -1.84569367 |
| O  | 2.41851459  | -1.67324156 | -0.29671645 |
| H  | 2.22385873  | -1.13765105 | -1.10320788 |
| H  | 2.86516774  | -1.00423918 | 0.25537878  |
| Na | 0.25903175  | -1.56333092 | 0.53919956  |

**3H**

|    |             |             |             |
|----|-------------|-------------|-------------|
| O  | 0.20900739  | -1.29883107 | -3.88224447 |
| H  | 0.04630130  | -1.03398674 | -4.79003594 |
| C  | 0.64059426  | 1.51730845  | 1.57109868  |
| H  | 0.30939562  | 2.51198087  | 1.24074451  |
| H  | 1.71244826  | 1.59260445  | 1.77535754  |
| C  | -0.10831743 | 1.11869093  | 2.86435815  |
| H  | -0.01813413 | 0.03353013  | 3.00957994  |
| H  | 0.34886869  | 1.61241779  | 3.72560101  |
| C  | 0.46417248  | 0.55629984  | 0.38693229  |
| O  | 1.42964895  | 0.37127593  | -0.38599056 |
| O  | -0.68670156 | -0.00293164 | 0.24434318  |
| C  | -1.59784694 | 1.47308814  | 2.90322712  |
| O  | -2.33114096 | 1.05900447  | 1.87441504  |
| O  | -2.08608576 | 2.09107994  | 3.83807125  |
| H  | -1.74182867 | 0.57925529  | 1.18584710  |
| O  | 2.41666454  | -1.61643358 | -2.54520995 |
| H  | 1.71668655  | -1.40428647 | -3.24348404 |
| H  | 2.46087550  | -0.84318216 | -1.96375678 |
| O  | 0.05431867  | -3.50428703 | -2.54374738 |
| H  | 1.00232766  | -3.50966785 | -2.34346498 |
| H  | 0.00876544  | -2.81584225 | -3.28323072 |
| Na | 0.00484153  | -1.16797851 | -1.69775753 |

| <b>3I</b> |             |             |             | <b>3J</b> |             |             |             |
|-----------|-------------|-------------|-------------|-----------|-------------|-------------|-------------|
| C         | -0.95202788 | 0.21996514  | 0.13606247  | O         | 1.29589828  | -1.96116041 | -0.44419672 |
| C         | -2.45049360 | 0.21784541  | 0.55312846  | H         | 1.77386485  | -1.70161918 | 0.35643722  |
| C         | 1.08233652  | -0.96487205 | -0.66499789 | C         | 0.64980561  | 0.43395290  | 1.68749776  |
| C         | -0.41290427 | -1.09784273 | -0.45546724 | H         | 0.53992330  | -0.65249345 | 1.79569827  |
| H         | -0.63437271 | -1.92204546 | 0.22493389  | H         | 1.48792881  | 0.61610307  | 0.99924669  |
| H         | -0.83247388 | 1.03011710  | -0.59418902 | C         | -0.65544936 | 1.01904050  | 1.11235655  |
| H         | -0.37181410 | 0.49699365  | 1.02837855  | H         | -1.47237110 | 0.75589050  | 1.79231364  |
| H         | -0.91248172 | -1.28611925 | -1.41104629 | H         | -0.58467413 | 2.10754139  | 1.06405450  |
| O         | 1.87056808  | -1.55094586 | 0.14832171  | C         | 1.07064483  | 0.98057648  | 3.09755289  |
| O         | -2.85172177 | 1.32116642  | 1.02691914  | O         | 0.26024859  | 1.74901946  | 3.67473505  |
| O         | -3.10516765 | -0.84426548 | 0.38470529  | O         | 2.19079370  | 0.55173529  | 3.48483632  |
| O         | 1.50068248  | -0.17556065 | -1.58331329 | C         | -0.92263571 | 0.45989219  | -0.26541854 |
| Na        | 3.18546392  | 0.69949867  | -0.36462172 | O         | -1.17381339 | -0.81449671 | -0.36203017 |
| O         | 1.54617882  | 2.34781244  | -0.68432238 | O         | -0.82061947 | 1.19338942  | -1.29009142 |
| H         | 1.20197205  | 1.56376906  | -1.18126926 | H         | 0.36330626  | -1.68208229 | -0.26419259 |
| H         | 0.81605004  | 2.60764596  | -0.10717496 | Na        | -0.59524102 | -0.54218001 | -2.75637885 |
| O         | 4.40791003  | -1.10790269 | 0.25791598  | O         | -2.61769537 | -1.66347198 | -2.38323537 |
| H         | 3.45523562  | -1.46576492 | 0.19288801  | H         | -2.25514398 | -1.39958515 | -1.48389733 |
| H         | 4.80363184  | -1.49660755 | 1.04455257  | H         | -3.52604075 | -1.34527428 | -2.41933786 |
| O         | -5.47717143 | 0.37679813  | 1.46048261  | O         | 1.64848366  | -0.18809990 | -2.47597255 |
| H         | -4.99013710 | -0.37610218 | 1.07412838  | H         | 1.43187146  | 0.64206484  | -2.02184698 |
| H         | -4.73145843 | 1.01362459  | 1.45640502  | H         | 1.70915005  | -0.85004296 | -1.74036413 |



**3K**

|    |             |             |             |
|----|-------------|-------------|-------------|
| C  | -0.27733303 | 0.53231058  | 0.24538908  |
| C  | -1.81723407 | 0.49794956  | 0.40202660  |
| C  | 1.80776975  | -0.42933319 | -0.73331661 |
| C  | 0.30437721  | -0.58556658 | -0.64079200 |
| H  | 0.05227987  | -1.55549936 | -0.20462655 |
| H  | -0.00888064 | 1.51449986  | -0.16479646 |
| H  | 0.15951148  | 0.48092395  | 1.25076630  |
| H  | -0.13982532 | -0.51933055 | -1.63705637 |
| O  | 2.53019652  | -0.98884871 | 0.16927148  |
| O  | -2.28708069 | 1.41808209  | 1.14002033  |
| O  | -2.45504071 | -0.40444368 | -0.19927926 |
| O  | 2.29785885  | 0.30275046  | -1.65491589 |
| Na | 4.31944630  | 0.41121582  | -0.87080869 |
| O  | 5.07552743  | -1.37541811 | 0.28785393  |
| H  | 4.06440710  | -1.42412145 | 0.34181343  |
| H  | 5.44076315  | -1.78421632 | 1.07841218  |
| O  | -4.90853740 | 1.85569793  | 1.29089960  |
| H  | -3.91916322 | 1.67458912  | 1.27718641  |
| H  | -5.13629804 | 1.92101219  | 0.35527439  |
| O  | -5.08433395 | -0.98039448 | 0.59719069  |
| H  | -5.23523896 | -0.15090179 | 1.08250209  |
| H  | -4.15983366 | -0.85942363 | 0.27743930  |

**Table S6.** The Cartesian atomic coordinates of the typical low-lying isomers of  $\text{Na}^+(\text{DC}_2^{2-})(\text{H}_2\text{O})_4$  using B3LYP exchange-correlation functional with dispersion correction.

| <b>4A</b> |             |             |             | <b>4B</b> |             |             |             |
|-----------|-------------|-------------|-------------|-----------|-------------|-------------|-------------|
| C         | -0.02747766 | -2.27353123 | -0.88783388 | C         | 0.00304288  | -2.07009808 | -0.77717726 |
| H         | 0.96740052  | -2.14491634 | -1.32643780 | H         | 1.03451737  | -2.14766306 | -1.13383247 |
| H         | -0.45202360 | -3.22583474 | -1.22489486 | H         | -0.56834111 | -2.93755782 | -1.12765765 |
| C         | 0.09391834  | -2.30812561 | 0.65770428  | C         | -0.00294515 | -2.07006999 | 0.77723004  |
| H         | -0.89712869 | -2.46820930 | 1.09183330  | H         | -1.03440122 | -2.14776896 | 1.13385902  |
| H         | 0.76178363  | -3.12940993 | 0.94332445  | H         | 0.56864017  | -2.93737923 | 1.12775770  |
| C         | -0.96474477 | -1.13210060 | -1.32203368 | C         | -0.63737351 | -0.78866093 | -1.33247361 |
| O         | -2.19404860 | -1.29217091 | -1.15377754 | O         | -1.89460583 | -0.69194097 | -1.31963984 |
| O         | -0.40448489 | -0.06381562 | -1.76052478 | O         | 0.15243596  | 0.14175178  | -1.70441395 |
| C         | 0.67691158  | -0.99408396 | 1.17975627  | C         | 0.63742106  | -0.78855969 | 1.33234897  |
| O         | 1.90886276  | -0.76511405 | 0.96137982  | O         | 1.89461073  | -0.69177200 | 1.31975035  |
| O         | -0.10984594 | -0.15732113 | 1.72516962  | O         | -0.15249850 | 0.14181971  | 1.70429325  |
| Na        | 0.60248623  | 1.43778327  | -0.04685214 | Na        | -0.00002519 | 1.68458088  | -0.00009177 |
| O         | 1.94493362  | 1.82083001  | 1.94540358  | O         | 2.26263871  | 1.98678590  | 0.50350159  |
| H         | 1.13198511  | 1.54707358  | 2.40240883  | H         | 2.18716872  | 1.22785758  | 1.12398752  |
| H         | 2.26350177  | 0.93488009  | 1.65329511  | H         | 2.66266098  | 1.54265999  | -0.27340642 |
| O         | 2.25106972  | 0.44478067  | -1.57215796 | O         | 2.84852891  | -0.10438446 | -1.30329925 |
| H         | 2.43155272  | -0.11821486 | -0.79619154 | H         | 2.77353221  | -0.55797305 | -0.44215074 |
| H         | 1.36499926  | 0.12833794  | -1.87241566 | H         | 1.90537433  | -0.06520193 | -1.59725870 |
| O         | -2.72028901 | 0.47454633  | 0.95977259  | O         | -2.84856196 | -0.10446691 | 1.30335017  |
| H         | -1.88783462 | 0.17413471  | 1.38280030  | H         | -1.90539327 | -0.06523971 | 1.59727454  |
| H         | -2.80665754 | -0.14119774 | 0.20154291  | H         | -2.77352672 | -0.55813219 | 0.44222929  |
| O         | -1.47371539 | 2.27439944  | -0.75561603 | O         | -2.26274320 | 1.98668592  | -0.50353507 |
| H         | -1.34798969 | 1.53747075  | -1.39385803 | H         | -2.18724961 | 1.22774823  | -1.12399921 |
| H         | -2.04551999 | 1.85007636  | -0.07507415 | H         | -2.66273034 | 1.54254649  | 0.27338650  |

| <b>4C</b> |             |             |             | <b>4D</b> |             |             |             |
|-----------|-------------|-------------|-------------|-----------|-------------|-------------|-------------|
| C         | -0.89217609 | -2.04493880 | 0.63715316  | C         | 1.55743018  | 0.19766399  | 1.78591550  |
| H         | -1.93014354 | -1.71639990 | 0.52328967  | H         | 1.72504697  | 0.39488926  | 2.85199403  |
| H         | -0.87104177 | -3.05348919 | 1.06690285  | H         | 2.46532885  | 0.43599245  | 1.22449642  |
| C         | -0.21462316 | -2.08890407 | -0.75877695 | C         | 1.21434405  | -1.30347818 | 1.60265086  |
| H         | 0.82817083  | -2.39833323 | -0.63877303 | H         | 2.06917232  | -1.90233397 | 1.93660542  |
| H         | -0.74554188 | -2.81604219 | -1.38463835 | H         | 0.33832436  | -1.54834737 | 2.21114151  |
| C         | -0.12249157 | -1.09470884 | 1.56969731  | C         | 0.39744860  | 1.07350463  | 1.30119803  |
| O         | 1.00177980  | -1.47816292 | 1.98124262  | O         | 0.57704588  | 1.76698472  | 0.24416723  |
| O         | -0.63548533 | 0.05627086  | 1.79219736  | O         | -0.70412123 | 0.99208151  | 1.91238724  |
| C         | -0.29297585 | -0.71499302 | -1.44012004 | C         | 0.94648187  | -1.60780909 | 0.11773183  |
| O         | -1.41046724 | -0.34230745 | -1.87756302 | O         | -0.28355691 | -1.71426296 | -0.23809386 |
| O         | 0.77202073  | -0.00101463 | -1.45037202 | O         | 1.93028350  | -1.65787931 | -0.65348777 |
| Na        | 0.55919306  | 1.46854997  | 0.46298320  | O         | -1.58047442 | 2.54435669  | -1.23717948 |
| O         | 0.32312978  | 2.71442596  | -1.58812174 | H         | -1.30059184 | 2.09226218  | -2.04662678 |
| H         | 0.47396554  | 1.77538268  | -1.85929659 | H         | -0.78251622 | 2.50850630  | -0.65131773 |
| H         | -0.61049184 | 2.71620923  | -1.32175286 | O         | 1.79841806  | 0.77231523  | -2.03696399 |
| O         | -1.95045634 | 1.62394469  | -0.01469439 | H         | 1.53210926  | 1.23036151  | -1.20926532 |
| H         | -1.96700504 | 1.01420835  | -0.78624132 | H         | 2.04557155  | -0.12188628 | -1.71913154 |
| H         | -1.75963298 | 1.01063265  | 0.73303220  | O         | -2.37943511 | -1.21086591 | 1.43424970  |
| O         | 2.62645063  | 0.31556868  | 0.65305947  | H         | -1.64132068 | -1.65302784 | 0.95129072  |
| H         | 2.27971754  | -0.01436596 | -0.20073725 | H         | -1.90964327 | -0.53082288 | 1.95466062  |
| H         | 2.24635646  | -0.32132910 | 1.30155710  | Na        | -1.62641287 | 0.35017712  | -0.29775465 |
| O         | 1.16039705  | 1.53564471  | 1.63021054  | O         | -0.75203400 | -0.19749539 | -2.49680234 |
| H         | 0.35872186  | 1.03662938  | 1.80312841  | H         | -0.56336898 | -1.00074871 | -1.96111633 |
| H         | 1.83175382  | 0.94978416  | 1.27293266  | H         | 0.14049675  | 0.22118294  | -2.53903759 |

**4E**

|    |             |             |             |
|----|-------------|-------------|-------------|
| C  | 0.40021899  | -0.58879774 | 2.43968184  |
| H  | -0.39641479 | -1.33878127 | 2.46124683  |
| H  | 0.79851591  | -0.44213204 | 3.45033309  |
| C  | 1.54846065  | -1.09986001 | 1.52890538  |
| H  | 2.35121181  | -0.35706661 | 1.50411006  |
| H  | 1.93110019  | -2.04276347 | 1.93741056  |
| C  | -0.14250513 | 0.75739317  | 1.92204390  |
| O  | 0.55940923  | 1.77788584  | 2.11895768  |
| O  | -1.24279012 | 0.72179037  | 1.26763596  |
| C  | 1.02125195  | -1.35422016 | 0.11537172  |
| O  | 0.21722001  | -2.31506175 | -0.04500161 |
| O  | 1.33020420  | -0.51321046 | -0.79536658 |
| O  | -1.01135417 | 2.11574407  | -1.09311073 |
| H  | -1.24308396 | 1.93935483  | -0.15091530 |
| H  | -0.04875859 | 2.32451717  | -1.01274936 |
| O  | -0.23873993 | -0.02538527 | -2.95506260 |
| H  | -0.53633283 | 0.85476570  | -2.66405859 |
| H  | 0.48084100  | -0.25776209 | -2.31446974 |
| O  | 1.65786569  | 2.22403234  | -0.40917874 |
| H  | 1.39079400  | 2.29023807  | 0.53323012  |
| H  | 1.74720533  | 1.25480353  | -0.54093549 |
| Na | -1.30296921 | -0.34987498 | -0.68698021 |
| O  | -1.69761158 | -2.30403067 | -2.04069343 |
| H  | -0.94972988 | -2.54844236 | -1.44637001 |
| H  | -1.28873475 | -1.70617702 | -2.69323759 |

**4F**

|    |             |             |             |
|----|-------------|-------------|-------------|
| C  | 0.88728363  | 0.13024035  | 2.23978830  |
| H  | 0.08914091  | -0.41165461 | 2.75539383  |
| H  | 1.49969493  | 0.61843112  | 3.01176176  |
| C  | 1.75867105  | -0.83188838 | 1.42579513  |
| H  | 2.59639395  | -0.29992982 | 0.96554169  |
| H  | 2.18543346  | -1.59589902 | 2.09186181  |
| C  | 0.22745604  | 1.24699977  | 1.41352407  |
| O  | -0.84256324 | 1.74888561  | 1.84669068  |
| O  | 0.79004295  | 1.58598627  | 0.31525455  |
| C  | 1.01256799  | -1.57551883 | 0.30567591  |
| O  | -0.25091478 | -1.73171615 | 0.43463082  |
| O  | 1.67783559  | -1.96736357 | -0.68858272 |
| O  | -1.34317862 | 2.60151061  | -1.01289654 |
| H  | -1.90390449 | 2.58117720  | -0.22326085 |
| H  | -0.45017377 | 2.52722915  | -0.59608780 |
| O  | 1.44092505  | 0.44291607  | -2.09617763 |
| H  | 1.49829827  | 0.96132970  | -1.26809244 |
| H  | 1.74283956  | -0.44285777 | -1.81272661 |
| O  | -2.49542810 | -0.16267757 | 0.63450703  |
| H  | -2.17546142 | 0.55821669  | 1.21242125  |
| H  | -1.83889185 | -0.87052472 | 0.79492856  |
| Na | -0.83056753 | 0.21830805  | -1.15095107 |
| O  | -0.95736671 | -1.99710334 | -2.16869028 |
| H  | -0.85445607 | -2.18645639 | -1.20423163 |
| H  | -0.03569197 | -2.07151794 | -2.45753545 |

**4G**

|    |             |             |             |
|----|-------------|-------------|-------------|
| C  | 1.13927404  | -2.02427885 | -0.78780205 |
| H  | 1.44836382  | -2.50417484 | -1.72821486 |
| H  | 0.96962066  | -2.80929920 | -0.04719492 |
| C  | 2.24038936  | -1.06564015 | -0.30259296 |
| H  | 3.12412808  | -1.65233592 | -0.01495028 |
| H  | 2.53869811  | -0.37796004 | -1.09911483 |
| C  | -0.20913488 | -1.33319639 | -1.03577606 |
| O  | -1.25751999 | -2.00540369 | -0.83476827 |
| O  | -0.19327265 | -0.11538942 | -1.41866965 |
| C  | 1.78059403  | -0.24898848 | 0.92280458  |
| O  | 2.02202440  | 1.00338406  | 0.91921396  |
| O  | 1.14145144  | -0.86330499 | 1.81775061  |
| O  | -1.11956928 | 0.63351033  | 2.19159966  |
| H  | -1.80901552 | 0.07618403  | 1.78263222  |
| H  | -0.31481848 | 0.06341268  | 2.27202536  |
| O  | -3.04151623 | -0.68663542 | 0.53921123  |
| H  | -3.70476631 | -1.30967071 | 0.85437605  |
| H  | -2.41110782 | -1.21370461 | -0.05124782 |
| Na | -0.21469396 | 1.62457373  | 0.29734445  |
| O  | -2.28462152 | 1.57589117  | -0.98450002 |
| H  | -1.69307278 | 0.90953581  | -1.40750128 |
| H  | -2.86003622 | 1.01851790  | -0.43185762 |
| O  | 1.47689597  | 2.15601235  | -1.46954035 |
| H  | 1.03313580  | 1.34607499  | -1.78635905 |
| H  | 1.96438295  | 1.82043837  | -0.67960934 |

**4H**

|    |             |             |             |
|----|-------------|-------------|-------------|
| C  | 1.29258546  | -0.15449820 | 2.12851709  |
| H  | 1.35326862  | -0.61713449 | 3.12426914  |
| H  | 1.92037130  | 0.74024936  | 2.14300362  |
| C  | 1.79594088  | -1.13909778 | 1.06206509  |
| H  | 2.87189098  | -1.31201901 | 1.20835648  |
| H  | 1.29247393  | -2.10620355 | 1.14802836  |
| C  | -0.15769330 | 0.31795769  | 1.91542115  |
| O  | -0.48146334 | 1.41936178  | 2.43556830  |
| O  | -0.93402048 | -0.41428501 | 1.22104212  |
| C  | 1.59314925  | -0.59946133 | -0.36362439 |
| O  | 1.18112587  | -1.43083516 | -1.24713901 |
| O  | 1.79502067  | 0.62443121  | -0.56764165 |
| O  | -0.51720803 | 1.79847115  | -1.44509626 |
| H  | -0.97198725 | 2.27629038  | -0.71305127 |
| H  | 0.38685619  | 1.56931566  | -1.12458395 |
| O  | -0.27625019 | -0.39329561 | -3.32730982 |
| H  | 0.45666827  | -0.75674456 | -2.77181397 |
| H  | -0.27235924 | 0.55755837  | -3.13183258 |
| O  | -1.83834105 | 2.89981670  | 0.72239354  |
| H  | -1.48707260 | 3.76794398  | 0.95257514  |
| H  | -1.46013189 | 2.28623193  | 1.42394728  |
| Na | -1.12083738 | -0.44883039 | -1.03424926 |
| O  | -1.00530610 | -2.78435818 | -0.19912950 |
| H  | -0.98131403 | -2.18170776 | 0.57350268  |
| H  | -0.12866795 | -2.62264949 | -0.61044688 |

| <b>4I</b> |             |             |             | <b>4J</b> |             |             |             |
|-----------|-------------|-------------|-------------|-----------|-------------|-------------|-------------|
| C         | 1.58164879  | 0.31216803  | 1.95737727  | C         | 1.28641508  | 0.20163342  | 2.23738272  |
| H         | 2.04504642  | 0.27144872  | 2.94960501  | H         | 1.40319858  | 0.05697840  | 3.32105692  |
| H         | 2.03380353  | 1.12667808  | 1.38235083  | H         | 1.89710989  | 1.06839055  | 1.96553981  |
| C         | 1.84799307  | -1.03492946 | 1.23442653  | C         | 1.76066483  | -1.05254233 | 1.49395798  |
| H         | 2.92784951  | -1.14889046 | 1.08146791  | H         | 2.83498621  | -1.20557492 | 1.67646576  |
| H         | 1.46873899  | -1.85301571 | 1.85283009  | H         | 1.23400648  | -1.94023319 | 1.85390093  |
| C         | 0.06727473  | 0.53961256  | 2.12633480  | C         | -0.18568298 | 0.58225201  | 1.97728900  |
| O         | -0.48637492 | 1.34012989  | 1.26929716  | O         | -0.53346379 | 1.76403630  | 2.21582609  |
| O         | -0.53824587 | -0.09536658 | 3.00327541  | O         | -0.93863895 | -0.33324593 | 1.49563317  |
| C         | 1.14332753  | -1.05819017 | -0.12204479 | C         | 1.55674393  | -0.99540030 | -0.02552618 |
| O         | 0.05947998  | -1.71350119 | -0.20704722 | O         | 1.38188235  | -2.07291402 | -0.64391685 |
| O         | 1.62494289  | -0.33885524 | -1.05413586 | O         | 1.55920663  | 0.16546916  | -0.57815229 |
| Na        | -0.73256414 | 0.63278142  | -1.05609561 | O         | -0.09943789 | 2.34300406  | -0.51156809 |
| O         | 0.92554834  | 2.45404291  | -0.74048207 | H         | -0.44961862 | 2.47899313  | 0.39196732  |
| H         | 1.50421218  | 1.69364189  | -0.92725296 | H         | 0.69012452  | 1.78272243  | -0.35438337 |
| H         | 0.52980095  | 2.22716970  | 0.13702242  | O         | 0.48373237  | 0.77311374  | -2.94597835 |
| O         | -2.54699420 | -0.19276445 | 0.46335265  | H         | 0.19774417  | 1.65958282  | -2.68210638 |
| H         | -2.06684209 | -0.96843238 | 0.79683216  | H         | 1.06718935  | 0.48031476  | -2.19323605 |
| H         | -2.08823038 | 0.52688462  | 0.96476512  | O         | -3.14996808 | 0.03331333  | 0.11944220  |
| O         | -1.86374323 | -1.51048590 | -2.04668157 | H         | -3.47819973 | -0.86979783 | 0.03365995  |
| H         | -1.11749896 | -1.74453217 | -1.43008615 | H         | -2.47339777 | -0.00784398 | 0.85684909  |
| H         | -2.53716300 | -1.14117690 | -1.45467266 | Na        | -0.93029135 | 0.04751939  | -0.87863821 |
| O         | 0.05239990  | 0.12373589  | -3.32974481 | O         | -0.68968297 | -1.78460731 | -2.40190422 |
| H         | 0.75833765  | -0.16497543 | -2.70868334 | H         | 0.11022519  | -2.03190283 | -1.87273751 |
| H         | -0.64764963 | -0.54602239 | -3.22888719 | H         | -0.36872009 | -1.09095283 | -3.00166960 |

| 4K |             |             |             | 4L |             |             |             |
|----|-------------|-------------|-------------|----|-------------|-------------|-------------|
| C  | -2.43883735 | 0.74576842  | -0.32368651 | C  | -1.52771477 | -1.72936405 | -0.52217757 |
| C  | -2.27831684 | -0.14683059 | 0.92168103  | H  | -2.55845648 | -2.10194811 | -0.43303474 |
| C  | -0.27858146 | -0.00180236 | -1.48701760 | H  | -0.85760808 | -2.59523921 | -0.52815832 |
| C  | -1.80133258 | 0.10390522  | -1.57860046 | C  | -1.41152600 | -0.93387979 | -1.83734373 |
| H  | -2.21922158 | -0.89391687 | -1.74283919 | H  | -1.85742240 | -1.50270089 | -2.65965148 |
| H  | -3.50788487 | 0.89509631  | -0.50771826 | H  | -1.97945841 | -0.00108669 | -1.72338538 |
| H  | -1.96030199 | 1.71688110  | -0.15169177 | C  | -1.25318083 | -0.91111544 | 0.73881406  |
| H  | -2.03679834 | 0.73471633  | -2.44647703 | O  | -1.85275991 | 0.21599773  | 0.85503892  |
| O  | 0.25264255  | -1.14514685 | -1.53006656 | O  | -0.45937088 | -1.36220574 | 1.61169339  |
| O  | -3.21556902 | -0.86808477 | 1.28456271  | C  | 0.03318475  | -0.56611278 | -2.23894991 |
| O  | -1.11339357 | -0.07282746 | 1.48944216  | O  | 0.38782162  | -0.71580655 | -3.41594884 |
| O  | 0.37244772  | 1.09166665  | -1.33788111 | O  | 0.76537297  | -0.09942486 | -1.27897582 |
| Na | 1.17553124  | -0.41324408 | 0.76404866  | Na | 0.68992079  | 0.98622724  | 0.71468426  |
| O  | 0.53235464  | -1.58525585 | 2.78474354  | O  | -0.44623770 | 1.24937405  | 2.90996980  |
| H  | -0.30762007 | -1.14461322 | 2.45610547  | H  | -1.14380719 | 0.89837074  | 2.29233891  |
| H  | 0.67854402  | -1.23823435 | 3.67136804  | H  | -0.09710374 | 0.41972630  | 3.26667926  |
| O  | 2.91174475  | 1.29143581  | -2.10530447 | O  | 2.80617598  | 1.48720854  | -0.44388850 |
| H  | 1.94721945  | 1.24399378  | -1.83945790 | H  | 3.19168447  | 0.75498341  | 0.06003234  |
| H  | 2.91798508  | 1.13572200  | -3.05677641 | H  | 2.23265470  | 1.02335706  | -1.09895235 |
| O  | 0.68791306  | 1.93796665  | 1.32837776  | O  | -0.98738349 | 2.76887701  | 0.36272039  |
| H  | 0.63490368  | 2.01337013  | 0.35753801  | H  | -1.50429912 | 1.93640615  | 0.30911329  |
| H  | -0.11680032 | 1.40108932  | 1.52493347  | H  | -0.98736574 | 2.98115874  | 1.30610073  |
| O  | 2.88456229  | -1.15042290 | -0.72711363 | O  | 2.15857140  | -1.13311538 | 0.79390403  |
| H  | 2.03867646  | -1.31543575 | -1.20739415 | H  | 1.36217504  | -1.46291562 | 1.25808811  |
| H  | 3.20277825  | -0.32878147 | -1.15129550 | H  | 1.80664230  | -1.01665221 | -0.11745480 |

| <b>4M</b> |             |             |             | <b>4N</b> |             |             |             |
|-----------|-------------|-------------|-------------|-----------|-------------|-------------|-------------|
| C         | -0.88932594 | -2.20712095 | 0.36993827  | C         | -0.86395931 | -1.16184159 | -0.10040491 |
| C         | -0.11713721 | -2.06655206 | -0.96601883 | H         | -1.38717160 | -2.12705937 | -0.07127799 |
| C         | -0.70246198 | -0.95408152 | -1.86079643 | H         | 0.20912412  | -1.37947401 | -0.05545456 |
| O         | -1.51793187 | -1.24947141 | -2.74282336 | C         | -1.20482327 | -0.43928723 | -1.41777216 |
| C         | -0.79100636 | -0.95282754 | 1.23447235  | H         | -2.28760744 | -0.35279039 | -1.51859435 |
| O         | -1.82796633 | -0.26027554 | 1.42762466  | H         | -0.75976055 | 0.56183988  | -1.39032843 |
| O         | 0.36542484  | -0.62000902 | 1.68032084  | C         | -1.27318789 | -0.35706633 | 1.14815177  |
| O         | -0.28220649 | 0.23996773  | -1.57957019 | O         | -0.41785678 | -0.35011149 | 2.10837533  |
| H         | -1.94381111 | -2.41697383 | 0.16784520  | O         | -2.36689310 | 0.25456767  | 1.13854914  |
| H         | -0.45670500 | -3.04484680 | 0.93285946  | C         | -0.63933308 | -1.20380683 | -2.61146779 |
| H         | 0.93528542  | -1.85645435 | -0.74605729 | O         | -1.34367707 | -1.90703037 | -3.32810513 |
| H         | -0.18642402 | -3.01722883 | -1.50518431 | O         | 0.66833681  | -1.08835358 | -2.80505347 |
| Na        | -0.20124744 | 1.50677629  | 0.39420505  | Na        | 1.32862204  | 0.60828573  | 0.99552740  |
| O         | -0.29170230 | 2.90024943  | -1.61746691 | O         | -1.39111501 | 1.93785163  | 3.14198065  |
| H         | 0.67644430  | 2.91767634  | -1.62114693 | H         | -0.94324728 | 1.05524297  | 3.14875640  |
| H         | -0.49577078 | 1.98190022  | -1.92521970 | H         | -2.10183294 | 1.69406657  | 2.51234856  |
| O         | 2.81982562  | -1.01589953 | 0.85674445  | O         | 1.83335006  | 0.47912251  | -1.24317348 |
| H         | 3.34937417  | -0.95229271 | 1.65948297  | H         | 1.14675431  | -0.41178523 | -2.14017760 |
| H         | 1.86579638  | -0.99579175 | 1.16638886  | H         | 2.25977271  | 1.17515557  | -1.75541990 |
| O         | 2.02430012  | 1.23262389  | -0.66575551 | O         | 0.59382748  | 2.79110372  | 1.51343916  |
| H         | 1.34181342  | 0.70000651  | -1.14732908 | H         | 0.20899199  | 3.18049743  | 0.71971500  |
| H         | 2.52367804  | 0.56605238  | -0.15406392 | H         | -0.17154124 | 2.60618112  | 2.12636041  |
| O         | -0.69361876 | 1.83412429  | 2.75719727  | O         | 3.32419891  | -0.70493328 | 0.47131334  |
| H         | 0.05789256  | 1.23271965  | 2.89068388  | H         | 3.25194632  | -1.66409909 | 0.40922232  |
| H         | -1.36335811 | 1.17193739  | 2.45348194  | H         | 2.88604229  | -0.32457998 | -0.36666807 |



**4O**

|    |             |             |             |
|----|-------------|-------------|-------------|
| C  | 0.08494603  | 0.02913552  | 2.00151648  |
| H  | -0.60332211 | 0.41636607  | 1.23782539  |
| H  | -0.45333303 | -0.68902842 | 2.62548791  |
| C  | 1.28389185  | -0.67915499 | 1.30280856  |
| H  | 2.06269094  | 0.05626795  | 1.08204669  |
| H  | 1.68783931  | -1.44874172 | 1.96778229  |
| C  | 0.55725812  | 1.23829962  | 2.85233537  |
| O  | 0.95188348  | 2.25036106  | 2.16800841  |
| O  | 0.53037868  | 1.13585659  | 4.09299570  |
| C  | 0.80184573  | -1.30102009 | 0.00594753  |
| O  | 0.18562168  | -2.40675318 | 0.04309675  |
| O  | 0.95014669  | -0.60774566 | -1.06367345 |
| Na | -1.14164060 | -0.07548620 | -1.83134071 |
| O  | -1.73575002 | 1.96805871  | -1.21054998 |
| H  | -2.09892434 | 2.81371460  | -1.48724971 |
| H  | -0.79986829 | 2.14765789  | -0.81108278 |
| O  | 0.64968577  | 2.13929267  | -0.35815460 |
| H  | 1.02261689  | 1.27365569  | -0.61628046 |
| H  | 0.77977976  | 2.20782535  | 0.67426986  |
| O  | -1.77798969 | -2.34060521 | -1.60156021 |
| H  | -0.98188011 | -2.47975459 | -0.97010094 |
| H  | -2.52900225 | -2.78866526 | -1.19866442 |
| O  | 0.04833107  | -1.35236996 | -3.56375675 |
| H  | 0.63335709  | -1.25281730 | -2.77698624 |
| H  | -0.55175669 | -2.06927815 | -3.30378413 |

**4P**

|    |             |             |             |
|----|-------------|-------------|-------------|
| C  | -1.97755178 | 0.05347441  | 1.64546738  |
| C  | -2.94256730 | 1.24122613  | 1.37106308  |
| C  | -0.09306814 | -1.10021641 | 0.24611450  |
| C  | -1.54125321 | -0.64334040 | 0.34232187  |
| H  | -2.18989828 | -1.48907742 | 0.09355641  |
| H  | -1.08744514 | 0.44762128  | 2.15030071  |
| H  | -2.46158747 | -0.65914087 | 2.32084837  |
| H  | -1.64120053 | 0.08093169  | -0.47945734 |
| O  | 0.18492374  | -2.01225925 | -0.61025338 |
| O  | -4.07905876 | 1.21273204  | 1.88039385  |
| O  | -2.46011262 | 2.16425993  | 0.61803261  |
| O  | 0.81323999  | -0.48765360 | 0.89875902  |
| Na | 1.90155036  | -0.27107481 | -1.23219127 |
| O  | 2.63626890  | -2.64340032 | 0.10460128  |
| H  | 1.68600305  | -2.57317870 | -0.22896637 |
| H  | 2.58222473  | -2.08286365 | 0.89479307  |
| O  | 0.79940143  | 1.50124323  | -2.08509412 |
| H  | 0.46627663  | 1.86401698  | -1.18319822 |
| H  | 0.02108282  | 1.46129940  | -2.65126315 |
| O  | 0.07972648  | 2.18749355  | 0.27821400  |
| H  | 0.36186362  | 1.39737276  | 0.77715393  |
| H  | -0.94808242 | 2.21629833  | 0.40975681  |
| O  | 3.92640339  | -1.29637218 | -1.74539223 |
| H  | 4.23217391  | -1.79773218 | -2.50807433 |
| H  | 3.60579627  | -1.94999174 | -1.06079700 |

**4Q**

|    |             |             |             |
|----|-------------|-------------|-------------|
| C  | 0.43841295  | 0.21705523  | 0.93466897  |
| H  | 0.48310371  | 1.31378959  | 0.98394774  |
| H  | -0.56001684 | -0.04576936 | 0.56542501  |
| C  | 1.52544099  | -0.29417851 | -0.04154953 |
| H  | 2.44360564  | 0.28326298  | 0.09137867  |
| H  | 1.73388973  | -1.34527306 | 0.17208187  |
| C  | 0.52973438  | -0.30970545 | 2.39294259  |
| O  | -0.56450612 | -0.25975253 | 3.02935246  |
| O  | 1.65453000  | -0.70249534 | 2.79646448  |
| C  | 0.97272919  | -0.14233276 | -1.44413696 |
| O  | 0.34674663  | -1.12070502 | -1.95934090 |
| O  | 1.01353901  | 1.01515686  | -1.99728295 |
| O  | -1.34857433 | 2.06755523  | -1.06278172 |
| H  | -1.38833070 | 1.96520768  | -0.10204210 |
| H  | -0.39547629 | 1.93832435  | -1.28204583 |
| O  | -0.64507214 | 1.22763361  | -4.07019684 |
| H  | -0.80016870 | 2.17780205  | -4.12881921 |
| H  | 0.13099523  | 1.12821744  | -3.44058585 |
| O  | 0.69119934  | -0.98548838 | 5.48387480  |
| H  | 1.37981643  | -1.02971815 | 4.79269777  |
| H  | -0.04977456 | -0.72065937 | 4.90240016  |
| Na | -1.63155786 | 0.07074820  | -2.29556545 |
| O  | -1.98182338 | -1.73972215 | -0.78531218 |
| H  | -1.02123767 | -1.81808775 | -1.00094247 |
| H  | -2.03061963 | -1.67629336 | 0.17827684  |

**4R**

|    |             |             |             |
|----|-------------|-------------|-------------|
| C  | 0.46262471  | -0.08618849 | 2.07633553  |
| H  | 0.13894768  | 0.91557957  | 1.75855032  |
| H  | -0.43921156 | -0.69603415 | 2.20326498  |
| C  | 1.36028351  | -0.71685456 | 0.99781458  |
| H  | 2.35014729  | -0.25827599 | 1.02310177  |
| H  | 1.48212685  | -1.78334799 | 1.22287801  |
| C  | 1.09890162  | 0.07432967  | 3.49948200  |
| O  | 0.31583468  | 0.60901402  | 4.33106035  |
| O  | 2.27720783  | -0.33431925 | 3.65243909  |
| C  | 0.75656542  | -0.56923853 | -0.38218644 |
| O  | -0.43716681 | -1.00240609 | -0.59065726 |
| O  | 1.41647521  | 0.03689471  | -1.28651942 |
| O  | -1.85078722 | 2.33008678  | -0.82982122 |
| H  | -2.14991923 | 1.65020255  | -0.15982636 |
| H  | -1.30952020 | 2.95925091  | -0.33913751 |
| O  | 0.84983991  | 0.15758028  | -3.80111805 |
| H  | 1.57419098  | 0.48792440  | -4.34300277 |
| H  | 1.20505132  | 0.03063818  | -2.86202993 |
| O  | -2.42366717 | 0.25873740  | 0.73097908  |
| H  | -2.17900983 | 0.38809419  | 1.65860227  |
| H  | -1.72137046 | -0.34905871 | 0.37909093  |
| Na | -0.88070911 | 0.75234078  | -2.16405835 |
| O  | -1.48307283 | -1.36837030 | -3.13931470 |
| H  | -1.12333295 | -1.56265849 | -2.24506210 |
| H  | -0.69474847 | -1.24450692 | -3.69288813 |

**4S**

|    |             |             |             |
|----|-------------|-------------|-------------|
| C  | 0.11143417  | 0.12396599  | 0.47385583  |
| H  | 0.18869215  | 1.17989958  | 0.18337096  |
| H  | -0.95142019 | -0.08717839 | 0.65427969  |
| C  | 0.64822617  | -0.76033945 | -0.66794517 |
| H  | 1.68081192  | -0.46734058 | -0.87992882 |
| H  | 0.63596461  | -1.80927389 | -0.36488252 |
| C  | 0.84543560  | -0.00615459 | 1.83209596  |
| O  | 0.29047127  | 0.59349491  | 2.78995662  |
| O  | 1.91997151  | -0.67410266 | 1.84378383  |
| C  | -0.21876141 | -0.55788431 | -1.89467387 |
| O  | -1.04037796 | -1.47633410 | -2.22856687 |
| O  | -0.17590602 | 0.57518777  | -2.48881033 |
| O  | -1.90664652 | 2.24001091  | -1.30558843 |
| H  | -1.93540524 | 2.23222569  | -0.34039231 |
| H  | -1.02488752 | 1.85625326  | -1.53785204 |
| O  | 3.30037949  | -1.13414050 | 4.08806121  |
| H  | 2.70188615  | -1.72721613 | 4.55754718  |
| H  | 2.80954674  | -0.92485643 | 3.23911367  |
| O  | 1.74566739  | 1.08784521  | 5.15077641  |
| H  | 2.48822211  | 0.49202933  | 4.94750638  |
| H  | 1.17216881  | 0.96972168  | 4.35966817  |
| Na | -2.43318610 | 0.58257309  | -2.86899550 |
| O  | -2.56662510 | -1.20039280 | -4.33000118 |
| H  | -1.89278258 | -1.47151851 | -3.62585697 |
| H  | -2.12763457 | -1.29148871 | -5.18238777 |

**4T**

|    |             |             |             |
|----|-------------|-------------|-------------|
| C  | 0.12563757  | -0.02432985 | 0.15058150  |
| H  | 0.03581496  | 1.06574378  | 0.04435565  |
| H  | -0.89598403 | -0.41641777 | 0.24693263  |
| C  | 0.81055877  | -0.60739850 | -1.10211866 |
| H  | 1.80282481  | -0.16199952 | -1.20554642 |
| H  | 0.91263992  | -1.68973350 | -0.99340921 |
| C  | 0.84390921  | -0.27510872 | 1.50057774  |
| O  | 0.17993487  | 0.05662229  | 2.51846201  |
| O  | 2.00881711  | -0.76395309 | 1.45139933  |
| C  | -0.06951348 | -0.27188520 | -2.28845164 |
| O  | -0.95889010 | -1.11194226 | -2.65672284 |
| O  | 0.00165783  | 0.89920982  | -2.79502388 |
| O  | -1.60910699 | 2.64824279  | -1.61976256 |
| H  | -1.59092022 | 2.64551528  | -0.65484504 |
| H  | -0.76840445 | 2.20451141  | -1.90210302 |
| O  | 3.36265720  | -1.36341085 | 3.69119654  |
| H  | 2.77945268  | -2.01366885 | 4.10067604  |
| H  | 2.88146525  | -1.10937478 | 2.85051165  |
| O  | 1.54438074  | 0.56929485  | 4.92688653  |
| H  | 2.36836877  | 0.11129693  | 4.68659435  |
| H  | 0.99416463  | 0.42852026  | 4.12292954  |
| Na | -2.36896826 | 0.83128525  | -2.90592077 |
| O  | -3.38206211 | -0.88671622 | -1.64474928 |
| H  | -3.46754031 | -0.91876938 | -0.68437621 |
| H  | -2.48301826 | -1.25355070 | -1.85569980 |

**Table S7.** The Cartesian atomic coordinates of the typical low-lying isomers of  $\text{Na}^+(\text{DC}_2^{2-})(\text{H}_2\text{O})_5$  using B3LYP exchange-correlation functional with dispersion correction.

| <b>5A</b> |             |             |             | <b>5B</b> |             |             |             |
|-----------|-------------|-------------|-------------|-----------|-------------|-------------|-------------|
| C         | -0.38000690 | -2.40673256 | 0.25338866  | C         | -0.98740683 | -2.28634247 | 0.08544123  |
| H         | 0.59922633  | -2.78579148 | -0.05299270 | H         | -2.00225432 | -2.09274666 | -0.27400320 |
| H         | -1.07596190 | -3.24501964 | 0.36771989  | H         | -0.95173983 | -3.26021032 | 0.58654785  |
| C         | -0.24665866 | -1.68702076 | 1.62373388  | C         | -0.02006170 | -2.31158067 | -1.12680143 |
| H         | -1.24206249 | -1.43273881 | 1.99891772  | H         | 1.00634142  | -2.45580728 | -0.77347177 |
| H         | 0.24447080  | -2.36675723 | 2.32942264  | H         | -0.29837089 | -3.15189334 | -1.77244661 |
| C         | -0.91763522 | -1.44125168 | -0.81275184 | C         | -0.57040428 | -1.21199006 | 1.09236573  |
| O         | -2.15440509 | -1.19499989 | -0.82486962 | O         | 0.44172022  | -1.45858848 | 1.81306109  |
| O         | -0.06173928 | -0.87950205 | -1.57265628 | O         | -1.21399108 | -0.11340778 | 1.09794799  |
| C         | 0.59440344  | -0.41237660 | 1.49611119  | C         | -0.14659996 | -1.01457296 | -1.94349368 |
| O         | 1.84210861  | -0.52755865 | 1.36068268  | O         | -1.18384449 | -0.86195222 | -2.62670693 |
| O         | -0.03582170 | 0.69927770  | 1.46345955  | O         | 0.78934400  | -0.14523617 | -1.81486483 |
| Na        | 0.06110808  | 1.33915455  | -0.87015626 | Na        | 0.45708459  | 1.36193972  | 0.13396427  |
| O         | 2.50024561  | 1.22417603  | -0.61871552 | O         | -0.13501595 | 2.48377923  | -1.84748825 |
| H         | 2.37432024  | 0.74578939  | 0.23913661  | H         | 0.20592984  | 1.64464171  | -2.22578710 |
| H         | 2.76771890  | 0.48600600  | -1.20007660 | H         | -1.07051541 | 2.25783241  | -1.65303154 |
| O         | 2.57804532  | -1.51051947 | -1.30155312 | O         | -2.45273512 | 1.09874948  | -1.11145993 |
| H         | 2.58092112  | -1.49707679 | -0.32870271 | H         | -2.21087150 | 0.44529629  | -1.80206702 |
| H         | 1.61812968  | -1.37458486 | -1.50307688 | H         | -2.20683735 | 0.64198298  | -0.27994368 |
| O         | -2.80834733 | 0.64549102  | 1.25253472  | O         | 2.42985774  | -0.13322099 | 0.30085014  |
| H         | -1.85429196 | 0.71499051  | 1.48062053  | H         | 2.04184706  | -0.25966376 | -0.60237104 |
| H         | -2.82916595 | -0.14592188 | 0.68135482  | H         | 1.95280330  | -0.79788936 | 0.83303412  |
| O         | -2.21169945 | 1.53783622  | -1.40246966 | O         | 1.87433337  | 0.38657091  | 3.24602231  |
| H         | -2.26544852 | 0.56376471  | -1.53106256 | H         | 1.29096588  | -0.31856115 | 2.86664819  |
| H         | -2.58750713 | 1.62978399  | -0.50561502 | H         | 2.55627087  | 0.50315911  | 2.56951428  |
| O         | 0.85190990  | 3.18884862  | 0.60595092  | O         | -0.09647234 | 2.12829750  | 2.32990140  |
| H         | 0.63168540  | 2.41632324  | 1.17226803  | H         | -0.70444479 | 1.37407951  | 2.18101470  |
| H         | 1.70593137  | 2.94707077  | 0.21449276  | H         | 0.63663480  | 1.71618197  | 2.83416230  |

**5C**

|    |             |             |             |
|----|-------------|-------------|-------------|
| C  | 0.45464653  | -1.03240122 | 2.36053496  |
| H  | 0.09254954  | -2.04657602 | 2.16591978  |
| H  | 0.68041004  | -0.92268235 | 3.42795036  |
| C  | 1.76219442  | -0.79344551 | 1.56054864  |
| H  | 2.15503971  | 0.19785642  | 1.80577147  |
| H  | 2.49394455  | -1.55764063 | 1.84336945  |
| C  | -0.63018732 | -0.01791679 | 1.96871871  |
| O  | -0.49302561 | 1.17558884  | 2.37475500  |
| O  | -1.56276643 | -0.42090088 | 1.21290312  |
| C  | 1.50966393  | -0.89470460 | 0.05464899  |
| O  | 1.54835177  | -2.01426672 | -0.49448230 |
| O  | 1.22040688  | 0.21438274  | -0.54365370 |
| O  | -1.31562984 | 2.71503051  | 0.21840577  |
| H  | -1.34179494 | 2.23303218  | 1.07967240  |
| H  | -0.38456002 | 3.01076717  | 0.20957397  |
| O  | -0.05762891 | -2.26129471 | -2.70308988 |
| H  | 0.04964874  | -1.39395290 | -3.12889016 |
| H  | 0.60030456  | -2.24426039 | -1.96400068 |
| O  | 1.45253263  | 2.57548682  | 0.88468013  |
| H  | 0.95829547  | 2.22964472  | 1.65485983  |
| H  | 1.50809795  | 1.77265157  | 0.31881676  |
| Na | -1.19944516 | 0.63303878  | -0.83667288 |
| O  | -2.29498261 | -1.42199122 | -1.29703180 |
| H  | -2.10067446 | -1.51654895 | -0.34624170 |
| H  | -1.57247169 | -1.88354643 | -1.78204579 |
| O  | 0.23942979  | 0.58062023  | -2.88928260 |
| H  | 0.80204092  | 0.39399279  | -2.07085040 |
| H  | 0.66928950  | 1.29368179  | -3.37323018 |

**5D**

|    |             |             |             |
|----|-------------|-------------|-------------|
| C  | 0.93664787  | 0.01018179  | 2.50340424  |
| H  | 0.32635235  | -0.72364999 | 3.03527585  |
| H  | 1.53278430  | 0.56856661  | 3.23895408  |
| C  | 1.89298489  | -0.70897567 | 1.53052857  |
| H  | 2.56460175  | 0.01285075  | 1.05914243  |
| H  | 2.49442967  | -1.43146004 | 2.09761707  |
| C  | -0.01096798 | 1.00418223  | 1.80890241  |
| O  | -1.21766505 | 1.00785916  | 2.14887752  |
| O  | 0.49178943  | 1.75331814  | 0.89669789  |
| C  | 1.12084015  | -1.48306872 | 0.45333616  |
| O  | 0.30367250  | -2.35548745 | 0.81114782  |
| O  | 1.35281716  | -1.14450197 | -0.77116819 |
| O  | -1.31680347 | 2.93402106  | -0.81329719 |
| H  | -2.09492753 | 2.37731508  | -0.65622543 |
| H  | -0.74120087 | 2.74462044  | -0.03303395 |
| O  | 2.19397641  | 1.41323747  | -1.26594147 |
| H  | 1.84913680  | 1.73292877  | -0.40691374 |
| H  | 2.18037361  | 0.44040811  | -1.13481026 |
| O  | -2.32686531 | 0.25180104  | -0.26505022 |
| H  | -2.12695820 | 0.44940145  | 0.67672253  |
| H  | -2.37694709 | -0.72763898 | -0.35243614 |
| Na | -0.22233185 | 0.78091820  | -1.24444128 |
| O  | -1.96363972 | -2.44801545 | -0.76738287 |
| H  | -1.16980893 | -2.55581629 | -0.18917064 |
| H  | -1.58735516 | -2.25491769 | -1.64318115 |
| O  | -0.28410953 | -1.22696155 | -2.73538720 |
| H  | 0.40701054  | -1.39391185 | -2.01446461 |
| H  | 0.14134804  | -1.39964141 | -3.58187434 |

| <b>5E</b> |             |             |             | <b>5F</b> |             |             |             |
|-----------|-------------|-------------|-------------|-----------|-------------|-------------|-------------|
| C         | 0.85388132  | -0.00157615 | 2.27894644  | C         | 1.44980142  | 0.07183813  | 2.19517836  |
| H         | -0.05765262 | -0.36028537 | 2.76604225  | H         | 1.56756269  | -0.13976790 | 3.26718778  |
| H         | 1.47298893  | 0.46144200  | 3.06068576  | H         | 2.18547761  | 0.83878447  | 1.93705094  |
| C         | 1.61570621  | -1.16369504 | 1.63838517  | C         | 1.69470938  | -1.20089805 | 1.38130492  |
| H         | 2.54264788  | -0.81125592 | 1.17604906  | H         | 2.73677988  | -1.52735323 | 1.50958790  |
| H         | 1.90155964  | -1.88772302 | 2.41465557  | H         | 1.05869090  | -2.02146785 | 1.72746239  |
| C         | 0.44780290  | 1.12172246  | 1.31198422  | C         | 0.06176019  | 0.70790175  | 2.00377394  |
| O         | -0.51876501 | 1.85668838  | 1.67457225  | O         | -0.06314209 | 1.90311861  | 2.38025695  |
| O         | 1.07477231  | 1.23433607  | 0.21384040  | O         | -0.86904675 | 0.01130933  | 1.47317197  |
| C         | 0.83567265  | -1.94508357 | 0.56724592  | C         | 1.44840100  | -1.01972540 | -0.12133102 |
| O         | -0.44208112 | -1.88290966 | 0.58658926  | O         | 1.06689537  | -2.03955659 | -0.77547093 |
| O         | 1.50105531  | -2.58557591 | -0.28740573 | O         | 1.57620661  | 0.14398002  | -0.61112369 |
| O         | -2.27524980 | 3.16463821  | 0.02720555  | O         | -0.66828787 | 2.00380994  | -1.01563113 |
| H         | -2.89312594 | 2.42264377  | -0.02446389 | H         | -1.28596502 | 2.36020328  | -0.33096514 |
| H         | -1.57602377 | 2.84976827  | 0.65425026  | H         | 0.15342814  | 1.80477477  | -0.53476745 |
| O         | 1.91887247  | -0.35057011 | -1.90704923 | O         | 1.04123952  | 1.02569239  | -3.15050686 |
| H         | 1.95047924  | 0.26654226  | -1.15062940 | H         | 0.39630746  | 1.68157291  | -2.84283388 |
| H         | 2.02430009  | -1.22655829 | -1.48592624 | H         | 1.40710503  | 0.66909964  | -2.30399569 |
| O         | -2.31061724 | 0.07815804  | 0.39003810  | O         | -2.31534694 | 2.57160744  | 1.12821857  |
| H         | -1.91007132 | 0.72808671  | 0.99800900  | H         | -2.62890810 | 1.65700474  | 1.19473079  |
| H         | -1.83657010 | -0.74644610 | 0.62927679  | H         | -1.50831797 | 2.50522049  | 1.71561333  |
| Na        | -0.47412689 | -0.08133666 | -1.32335896 | Na        | -1.00316791 | -0.34292351 | -0.91099201 |
| O         | -0.92449421 | -2.35455103 | -2.04430777 | O         | -0.45116820 | -1.32896906 | -2.98962966 |
| H         | -0.95305796 | -2.44273907 | -1.06149816 | H         | 0.20792506  | -1.75236526 | -2.39352294 |
| H         | -0.01078687 | -2.62773070 | -2.21589241 | H         | 0.02646004  | -0.54345898 | -3.33004640 |
| O         | -0.42684358 | 2.24573543  | -1.88083946 | O         | -1.49537159 | -2.40749623 | 0.37500510  |
| H         | 0.25122095  | 2.17982857  | -1.17412448 | H         | -1.26884253 | -1.71393585 | 1.03207982  |
| H         | -1.16197791 | 2.70595665  | -1.42785221 | H         | -0.62593630 | -2.65617684 | 0.00646897  |

**5G**

|    |             |             |             |
|----|-------------|-------------|-------------|
| C  | -1.35527911 | -1.79824267 | 0.32317819  |
| H  | -2.35068816 | -1.39056746 | 0.12462122  |
| H  | -1.44302460 | -2.79329366 | 0.77270264  |
| C  | -0.58182069 | -1.94084053 | -1.01460784 |
| H  | 0.40740972  | -2.35902025 | -0.81348748 |
| H  | -1.13947506 | -2.63044784 | -1.65774676 |
| C  | -0.59861294 | -0.88869481 | 1.29194732  |
| O  | 0.44758851  | -1.34823891 | 1.83850750  |
| O  | -1.01102277 | 0.30580628  | 1.44803341  |
| C  | -0.47295375 | -0.58951498 | -1.72850113 |
| O  | -1.50781750 | -0.11769336 | -2.25960414 |
| O  | 0.65905294  | 0.01474408  | -1.67925957 |
| Na | 0.39347456  | 1.77155601  | 0.01790795  |
| O  | 0.54593988  | 2.68240238  | -2.22067322 |
| H  | 0.59817653  | 1.69863389  | -2.32086134 |
| H  | -0.40517330 | 2.85558701  | -2.17522302 |
| O  | -1.98621520 | 1.98175756  | -0.55469208 |
| H  | -1.98737719 | 1.33374069  | -1.29507689 |
| H  | -1.98525610 | 1.40093127  | 0.23379695  |
| O  | 2.30132067  | 0.22273501  | 0.51168113  |
| H  | 1.93399187  | -0.03530107 | -0.36364433 |
| H  | 1.83536039  | -0.38268155 | 1.12726969  |
| O  | 0.81914382  | 2.13426814  | 2.37061248  |
| H  | 0.14131538  | 1.41675319  | 2.34206263  |
| H  | 1.65344715  | 1.66629985  | 2.21758904  |
| O  | 1.27150004  | -3.89022104 | 1.24951085  |
| H  | 2.08171061  | -3.69951657 | 0.76205288  |
| H  | 0.93304569  | -2.99877910 | 1.51335029  |

**5H**

|    |             |             |             |
|----|-------------|-------------|-------------|
| C  | 0.86941582  | -0.61649251 | 2.51651793  |
| H  | 0.07562373  | -1.35756229 | 2.65067497  |
| H  | 1.40557285  | -0.46906803 | 3.46075431  |
| C  | 1.87390081  | -1.13602398 | 1.45425661  |
| H  | 2.68416617  | -0.41016952 | 1.33822872  |
| H  | 2.28144567  | -2.09629899 | 1.79056097  |
| C  | 0.27440556  | 0.72551502  | 2.06383367  |
| O  | 0.97552967  | 1.75399072  | 2.17950281  |
| O  | -0.88573215 | 0.67397862  | 1.51399834  |
| C  | 1.16633556  | -1.34421954 | 0.11547700  |
| O  | 0.39167180  | -2.32739828 | -0.00669140 |
| O  | 1.32772852  | -0.43945744 | -0.77985774 |
| O  | -1.12041462 | 2.14355830  | -0.74338831 |
| H  | -1.05419345 | 1.89641252  | 0.21113313  |
| H  | -0.18870562 | 2.39241415  | -0.93130273 |
| O  | 0.64637727  | -0.52186691 | -3.35176658 |
| H  | 0.53487945  | 0.41103789  | -3.56990405 |
| H  | 0.98501525  | -0.53359821 | -2.41400599 |
| O  | 1.64525678  | 2.30268908  | -0.51789692 |
| H  | 1.50309990  | 2.39254217  | 0.44701722  |
| H  | 1.71581027  | 1.32889780  | -0.62316277 |
| Na | -1.21396185 | -0.31006981 | -0.66593099 |
| O  | -1.32139575 | -2.13932583 | -2.17813450 |
| H  | -0.67052598 | -2.45279625 | -1.50854598 |
| H  | -0.76887045 | -1.69258638 | -2.84824875 |
| O  | -3.34791559 | 0.50774499  | 0.32245690  |
| H  | -2.70169389 | 0.55859146  | 1.05487648  |
| H  | -3.20364882 | 1.33185167  | -0.16542706 |

| <b>5I</b> |             |             |             | <b>5J</b> |             |             |             |
|-----------|-------------|-------------|-------------|-----------|-------------|-------------|-------------|
| C         | 1.46415330  | 0.67369658  | 2.00886157  | C         | 1.53866986  | -0.11587019 | 2.20206931  |
| H         | 1.65000325  | 0.79545056  | 3.08240262  | H         | 1.61487022  | -0.71283416 | 3.12362073  |
| H         | 2.14709179  | 1.31163468  | 1.43957764  | H         | 1.95570064  | 0.87206581  | 2.41341832  |
| C         | 1.71722760  | -0.80938484 | 1.62884568  | C         | 2.30860303  | -0.80377982 | 1.06898678  |
| H         | 2.76340070  | -1.05559401 | 1.84493315  | H         | 3.38320971  | -0.80885881 | 1.29946555  |
| H         | 1.05524273  | -1.44847578 | 2.22033807  | H         | 2.00281240  | -1.84986193 | 0.96506801  |
| C         | 0.00773028  | 1.05396721  | 1.70766720  | C         | 0.05166003  | 0.09124436  | 1.91164623  |
| O         | -0.89188989 | 0.58686257  | 2.44337165  | O         | -0.55131438 | 1.04056993  | 2.45964483  |
| O         | -0.20874571 | 1.75983320  | 0.65747045  | O         | -0.51353677 | -0.73777434 | 1.09562134  |
| C         | 1.45975332  | -1.02717662 | 0.13490904  | C         | 2.11826948  | -0.13290528 | -0.30846420 |
| O         | 0.35812914  | -1.60708058 | -0.18705197 | O         | 2.40190207  | -0.82018852 | -1.32413594 |
| O         | 2.28119446  | -0.56733616 | -0.69014308 | O         | 1.64435035  | 1.04882011  | -0.30793145 |
| O         | 1.19236261  | 3.14855348  | -1.05034979 | O         | 0.08165549  | 2.78728772  | -1.77677711 |
| H         | 0.65425661  | 3.94484397  | -1.12491166 | H         | -0.49771620 | 2.95872510  | -1.01522066 |
| H         | 0.76991660  | 2.62244205  | -0.30480979 | H         | 0.87250702  | 2.34839111  | -1.39344281 |
| O         | 0.69319893  | 0.79608571  | -2.46395860 | O         | -0.01943691 | -1.09551517 | -2.58130296 |
| H         | 0.90216560  | 1.71757637  | -2.20326280 | H         | -0.31746709 | -1.88378958 | -2.08784388 |
| H         | 1.36507617  | 0.25670163  | -1.97734097 | H         | 0.93757978  | -1.00557454 | -2.35403403 |
| O         | -2.86668486 | -0.11111842 | 0.61749834  | O         | -2.85872689 | -0.46269749 | 0.13850887  |
| H         | -2.75526875 | -1.08009463 | 0.69468212  | H         | -3.60315809 | -0.60546640 | 0.73381110  |
| H         | -2.33613416 | 0.25711941  | 1.36395171  | H         | -2.00872677 | -0.55775620 | 0.69688022  |
| Na        | -1.06611021 | 0.22992774  | -0.84143711 | Na        | -0.56331491 | 0.52742400  | -1.01067541 |
| O         | -0.90077763 | -1.57373419 | -2.57855455 | O         | -1.84761701 | 2.19981408  | 0.34781191  |
| H         | -0.27431905 | -1.76221745 | -1.83666870 | H         | -1.42523232 | 1.91800721  | 1.19726979  |
| H         | -0.44992088 | -0.86311506 | -3.06273242 | H         | -2.53609799 | 1.52823496  | 0.20496983  |
| O         | -1.96026475 | -2.78713119 | 0.45023421  | O         | -1.13782747 | -2.81473250 | -0.61277144 |
| H         | -1.04065986 | -2.42377529 | 0.44416315  | H         | -0.63007860 | -2.33244729 | 0.07060112  |
| H         | -2.12264429 | -2.99681816 | -0.47905623 | H         | -1.98811866 | -2.34724123 | -0.60025318 |



| 5K |             |             |             | 5L |             |             |             |
|----|-------------|-------------|-------------|----|-------------|-------------|-------------|
| C  | -2.05118505 | -1.14352515 | 1.30022702  | C  | -1.45303825 | -1.26664554 | -0.65050753 |
| C  | -2.00715438 | 0.38137254  | 1.11893134  | H  | -2.42201718 | -0.78126909 | -0.50194478 |
| C  | -0.55822934 | -1.67145402 | -0.66229284 | H  | -1.59362403 | -2.34837384 | -0.75488654 |
| C  | -1.94818588 | -1.88314833 | -0.05706842 | C  | -0.80538685 | -0.71866523 | -1.95045440 |
| H  | -2.10949473 | -2.95444397 | 0.10223274  | H  | 0.17302782  | -1.18631897 | -2.09547633 |
| H  | -1.24729698 | -1.47719516 | 1.96595297  | H  | -1.45862394 | -0.97080731 | -2.79348492 |
| H  | -3.01466787 | -1.39416623 | 1.76131940  | C  | -0.54322253 | -1.00105028 | 0.55038444  |
| H  | -2.71388313 | -1.47871846 | -0.72663860 | O  | 0.49872990  | -1.72755156 | 0.65104024  |
| O  | 0.33122257  | -2.53130599 | -0.44490149 | O  | -0.81389476 | -0.03816250 | 1.32329284  |
| O  | -0.98391993 | 1.00312415  | 1.62771842  | C  | -0.66709104 | 0.80866665  | -1.88223596 |
| O  | -2.91495664 | 0.94055263  | 0.48664039  | O  | -1.71645879 | 1.49599135  | -1.93772569 |
| O  | -0.38281354 | -0.56698888 | -1.28805029 | O  | 0.50894766  | 1.28503851  | -1.69655101 |
| Na | 0.90137390  | 0.87486612  | -0.06643737 | Na | 0.49299370  | 1.76902967  | 0.70295135  |
| O  | -0.62083697 | 2.76480499  | -0.40160690 | O  | 0.54942022  | 3.78709918  | -0.60718435 |
| H  | -1.33647921 | 2.34541546  | -0.90323347 | H  | 0.52420265  | 3.04434984  | -1.26202232 |
| H  | -0.85086751 | 2.45733928  | 0.50548299  | H  | -0.38179333 | 3.92228900  | -0.37982298 |
| O  | 2.55565500  | -1.16230915 | 0.27310172  | O  | -1.90796310 | 2.40947295  | 0.64826059  |
| H  | 1.85514729  | -1.76077965 | -0.09453184 | H  | -2.01655717 | 2.24677310  | -0.31633265 |
| H  | 2.23957984  | -0.90947188 | 1.16007194  | H  | -1.86929589 | 1.49852147  | 1.00763233  |
| O  | 1.31508088  | 0.23828849  | -3.13690561 | O  | 2.33832886  | 0.35225712  | 0.16368186  |
| H  | 0.71568008  | -0.21946463 | -2.47835764 | H  | 1.93926047  | 0.52403242  | -0.71598710 |
| H  | 0.75218092  | 0.90018126  | -3.55521506 | H  | 1.90511800  | -0.48137028 | 0.43987252  |
| O  | 3.03582202  | 1.15036991  | -1.14023862 | O  | 1.63629239  | -2.81485858 | 2.90114886  |
| H  | 3.13229741  | 0.27719114  | -0.70185520 | H  | 2.56047605  | -2.55919198 | 2.79627592  |
| H  | 2.59352936  | 0.93153566  | -1.98772250 | H  | 1.15942847  | -2.29349903 | 2.21197338  |
| O  | 1.26970875  | 0.12479244  | 2.39135013  | O  | 0.84971532  | -4.53222062 | 0.55858495  |
| H  | 1.62099458  | 0.72784422  | 3.05461762  | H  | 0.64928692  | -3.61041379 | 0.30505121  |
| H  | 0.30034612  | 0.38949042  | 2.22517532  | H  | 1.15706971  | -4.41468321 | 1.47155682  |

**5M**

|    |             |             |             |
|----|-------------|-------------|-------------|
| C  | -0.88007020 | 0.17976744  | -0.58810801 |
| C  | -2.28118600 | -0.05937441 | 0.02617758  |
| C  | 1.21846991  | -0.80143626 | -1.46813354 |
| C  | -0.28443373 | -0.98680773 | -1.40553936 |
| H  | -0.53635742 | -1.92731117 | -0.91150393 |
| H  | -0.93150359 | 1.08907394  | -1.19720431 |
| H  | -0.22856867 | 0.40854030  | 0.26869357  |
| H  | -0.71291436 | -0.98262247 | -2.41288070 |
| O  | 1.95017548  | -1.44750453 | -0.65034926 |
| O  | -2.81746091 | 0.97619755  | 0.52271645  |
| O  | -2.73512452 | -1.23363973 | 0.02922466  |
| O  | 1.69174126  | 0.10457669  | -2.24232096 |
| Na | 2.79321574  | 0.74814140  | 0.11038386  |
| O  | 1.50449686  | 2.43375476  | -0.85371010 |
| H  | 1.39443049  | 1.76455595  | -1.57084910 |
| H  | 0.61426406  | 2.57233003  | -0.50423204 |
| O  | 1.79139806  | -0.47713174 | 1.83679079  |
| H  | 1.64098508  | -1.11143188 | 1.09538837  |
| H  | 0.95270125  | -0.39289792 | 2.30796619  |
| O  | -2.90968301 | 0.54220006  | 3.30659191  |
| H  | -3.57881531 | -0.15064582 | 3.17318956  |
| H  | -2.79489130 | 0.86552691  | 2.38806039  |
| O  | 4.32454639  | 0.00545363  | -1.54963551 |
| H  | 4.22312704  | -0.90891166 | -1.24182352 |
| H  | 3.47806757  | 0.10791315  | -2.05811168 |
| O  | -4.93711868 | -0.86674307 | 1.63825791  |
| H  | -4.20483592 | -1.21575250 | 1.07177364  |
| H  | -4.88579447 | 0.07123522  | 1.39857592  |

**Table S8.** The Cartesian atomic coordinates of the typical low-lying isomers of  $\text{Na}^+(\text{DC}_2^{2-})(\text{H}_2\text{O})_6$  using B3LYP exchange-correlation functional with dispersion correction.

| <b>6A</b> |             |             |             | <b>6B</b> |             |             |             |
|-----------|-------------|-------------|-------------|-----------|-------------|-------------|-------------|
| C         | 0.05767111  | -2.47348781 | -0.72102389 | C         | -1.36225810 | -2.21529465 | 0.11960448  |
| H         | 1.10815238  | -2.54522298 | -1.01588047 | H         | -2.30125857 | -1.86185166 | -0.31521245 |
| H         | -0.48354349 | -3.35374292 | -1.08479040 | H         | -1.52535613 | -3.17827451 | 0.61514410  |
| C         | -0.04312915 | -2.43801640 | 0.82852640  | C         | -0.31727859 | -2.41252094 | -1.00907937 |
| H         | -1.09284235 | -2.50576993 | 1.12703145  | H         | 0.61082689  | -2.80735920 | -0.58429481 |
| H         | 0.50637539  | -3.29526684 | 1.23249144  | H         | -0.71706669 | -3.13984125 | -1.72561416 |
| C         | -0.56599516 | -1.21565970 | -1.33443686 | C         | -0.85350292 | -1.20612522 | 1.15365611  |
| O         | -1.82261751 | -1.13422143 | -1.38183922 | O         | -0.02118898 | -1.61155781 | 2.01373081  |
| O         | 0.23377344  | -0.28694771 | -1.69523113 | O         | -1.24206041 | 0.00064188  | 1.02653941  |
| C         | 0.56876351  | -1.14715716 | 1.38196124  | C         | -0.02820655 | -1.10653349 | -1.76247735 |
| O         | 1.82445974  | -1.05164912 | 1.42517283  | O         | -0.95556259 | -0.59638486 | -2.44542615 |
| O         | -0.24014902 | -0.21010888 | 1.69840772  | O         | 1.12864591  | -0.58710938 | -1.61415642 |
| Na        | -0.00659204 | 1.50065484  | -0.04100884 | Na        | 0.71859664  | 1.22304939  | 0.08346710  |
| O         | 2.35728817  | 1.48559552  | 0.60048175  | O         | -0.77584566 | 2.04032764  | -1.72102001 |
| H         | 2.24319171  | 0.64094211  | 1.10303755  | H         | -0.74860845 | 1.17680242  | -2.19935359 |
| H         | 2.80114733  | 1.17178715  | -0.20848544 | H         | -1.68304699 | 2.03236600  | -1.36451939 |
| O         | 2.94070141  | -0.62750569 | -1.22996178 | O         | -3.10461843 | 0.60539468  | -0.91391821 |
| H         | 2.82545308  | -1.03326789 | -0.35268249 | H         | -2.67533869 | 0.06864112  | -1.60366507 |
| H         | 2.00980000  | -0.52879978 | -1.53611714 | H         | -2.55356639 | 0.39570414  | -0.12520403 |
| O         | -2.94408273 | -0.60466345 | 1.25117077  | O         | 2.31106270  | -0.59682080 | 0.81533812  |
| H         | -2.01502533 | -0.48046260 | 1.55315160  | H         | 2.12774772  | -0.76574111 | -0.13611748 |
| H         | -2.82243556 | -1.04701599 | 0.39254139  | H         | 1.64606320  | -1.14927256 | 1.26958174  |
| O         | -2.37629487 | 1.43177610  | -0.66842994 | O         | 1.48957976  | 0.12959018  | 3.59274738  |
| H         | -2.25667523 | 0.56619387  | -1.13273946 | H         | 0.85082042  | -0.49535296 | 3.17301868  |
| H         | -2.81665960 | 1.15175439  | 0.15468115  | H         | 2.25731966  | 0.09141205  | 3.00426767  |
| O         | 0.24781426  | 2.47165126  | 2.23838943  | O         | 0.06881499  | 2.11554468  | 2.21621757  |
| H         | 0.12186093  | 1.50269577  | 2.33811309  | H         | -0.61663352 | 1.44100973  | 2.02216914  |
| H         | 1.16753838  | 2.54924232  | 1.93908763  | H         | 0.63943800  | 1.64510745  | 2.85872605  |
| O         | -0.28797097 | 2.36641200  | -2.35023020 | O         | 2.03128973  | 2.02365383  | -1.86597400 |
| H         | -0.15061387 | 1.39636558  | -2.41654759 | H         | 1.81512268  | 1.08459150  | -2.05544166 |
| H         | -1.20512310 | 2.44244157  | -2.04217675 | H         | 1.19879624  | 2.48332401  | -2.06112112 |

**6C**

|    |             |             |             |
|----|-------------|-------------|-------------|
| C  | 0.71196388  | -1.56131221 | 2.10632124  |
| H  | 0.37449913  | -2.57914656 | 1.89486711  |
| H  | 0.85659415  | -1.46764557 | 3.19198896  |
| C  | 2.04887519  | -1.29525462 | 1.38850922  |
| H  | 2.43481188  | -0.30197618 | 1.62921401  |
| H  | 2.78083318  | -2.03786493 | 1.73324023  |
| C  | -0.42215356 | -0.60325213 | 1.71248564  |
| O  | -0.10903995 | 0.60297706  | 1.42062599  |
| O  | -1.59408483 | -1.06194472 | 1.66362403  |
| C  | 1.89889593  | -1.44992635 | -0.13214667 |
| O  | 1.39379829  | -2.51278906 | -0.56701692 |
| O  | 2.26111919  | -0.46047504 | -0.86495962 |
| O  | -1.71760254 | 2.76667394  | 0.72328913  |
| H  | -1.17980952 | 2.06917419  | 1.16153703  |
| H  | -1.20022286 | 2.98593044  | -0.07266657 |
| O  | -3.13490362 | 0.51283757  | -0.07915152 |
| H  | -2.94322320 | 1.42904327  | 0.20682634  |
| H  | -2.77579457 | -0.04144036 | 0.64948770  |
| O  | 2.06472656  | 1.92952579  | 0.38118353  |
| H  | 1.39521232  | 1.53217960  | 0.97881911  |
| H  | 2.37296682  | 1.12540681  | -0.10352823 |
| Na | -0.87340357 | 0.43012278  | -0.91006142 |
| O  | -1.21758885 | -1.91914088 | -1.10469477 |
| H  | -1.59040599 | -1.99908245 | -0.21136233 |
| H  | -0.30923698 | -2.29027588 | -1.02960061 |
| O  | 0.69566155  | 0.26595591  | -2.78374515 |
| H  | 1.37415049  | -0.13162579 | -2.14872225 |
| H  | 0.60427805  | -0.35383641 | -3.51477905 |
| O  | 0.15468613  | 2.63484082  | -1.40161218 |
| H  | 0.92522505  | 2.51833314  | -0.78447541 |
| H  | 0.38973594  | 2.11864601  | -2.19124503 |

**6D**

|    |             |             |             |
|----|-------------|-------------|-------------|
| C  | 1.19132753  | -0.50186860 | 2.39819016  |
| H  | 0.62177515  | -1.38848847 | 2.69116882  |
| H  | 1.75938854  | -0.12720882 | 3.25769048  |
| C  | 2.18652961  | -0.88141361 | 1.27202604  |
| H  | 2.81224759  | -0.01548924 | 1.03596355  |
| H  | 2.81906085  | -1.70154319 | 1.62798148  |
| C  | 0.22945227  | 0.59002661  | 1.93091176  |
| O  | 0.66615059  | 1.76607285  | 1.80344188  |
| O  | -0.95910256 | 0.22936101  | 1.63146690  |
| C  | 1.44039768  | -1.34384995 | 0.01234555  |
| O  | 1.03344222  | -2.52540782 | -0.04177936 |
| O  | 1.24189735  | -0.45237467 | -0.89801203 |
| O  | -0.43495459 | 2.65565246  | -0.53200792 |
| H  | -0.18381966 | 2.49754146  | 0.41282075  |
| H  | 0.44783840  | 2.69800211  | -0.94904026 |
| O  | -2.90241158 | 1.65308419  | 0.44656502  |
| H  | -2.46750833 | 2.33538367  | -0.08772288 |
| H  | -2.19408953 | 1.34466683  | 1.06729289  |
| O  | 2.30977340  | 2.04136811  | -0.60694289 |
| H  | 2.11061288  | 2.13655245  | 0.34021719  |
| H  | 2.02928967  | 1.10840379  | -0.78147044 |
| Na | -0.96479205 | 0.31240656  | -0.79659160 |
| O  | 0.34122582  | -2.41920585 | -2.72311525 |
| H  | 0.44210199  | -2.79624009 | -1.81974294 |
| H  | 0.82524975  | -1.58608769 | -2.57178506 |
| O  | -2.93006599 | -1.16665645 | 0.19449986  |
| H  | -2.23281884 | -1.14592304 | 0.87547360  |
| H  | -3.27360959 | -0.25358903 | 0.20425634  |
| O  | -2.01217114 | -1.00120637 | -2.46347589 |
| H  | -2.46626167 | -1.36937988 | -1.68317264 |
| H  | -1.27111513 | -1.62134252 | -2.66141579 |

**6E**

|    |             |             |             |
|----|-------------|-------------|-------------|
| C  | 0.51495932  | -1.29173977 | 2.40551994  |
| H  | 0.12265399  | -2.28400212 | 2.16964226  |
| H  | 0.70537343  | -1.21866464 | 3.48414459  |
| C  | 1.84620890  | -1.07539953 | 1.65371526  |
| H  | 2.24307556  | -0.08137873 | 1.87803252  |
| H  | 2.56717356  | -1.82787031 | 1.99772261  |
| C  | -0.53243038 | -0.23554546 | 2.03531278  |
| O  | -0.24778201 | 0.98374552  | 2.29202611  |
| O  | -1.59830933 | -0.61144397 | 1.47670305  |
| C  | 1.68056729  | -1.25141792 | 0.13627863  |
| O  | 1.26428316  | -2.35160149 | -0.28782407 |
| O  | 1.97327032  | -0.23267378 | -0.59265871 |
| O  | -1.96265455 | 2.70502915  | 1.14403620  |
| H  | -1.38902790 | 2.11900635  | 1.71382496  |
| H  | -1.34754278 | 3.29800783  | 0.69329894  |
| O  | -0.22842077 | -2.25646970 | -2.57727941 |
| H  | 0.14141663  | -1.45500610 | -2.99068956 |
| H  | 0.36787643  | -2.40065941 | -1.79961663 |
| O  | 1.45766433  | 2.20182272  | 0.48236367  |
| H  | 0.94527006  | 1.87995593  | 1.25491725  |
| H  | 1.83343774  | 1.36183373  | 0.11919073  |
| Na | -1.82708201 | 0.85741242  | -0.32083339 |
| O  | -2.34277945 | -1.26156034 | -1.14832755 |
| H  | -2.10339423 | -1.51652696 | -0.23876367 |
| H  | -1.65191046 | -1.67332226 | -1.72531549 |
| O  | 1.09248363  | 0.21774430  | -2.96635856 |
| H  | 1.49504162  | -0.03688594 | -2.06447856 |
| H  | 1.83277599  | 0.39344377  | -3.55763770 |
| O  | -0.38259321 | 2.16386830  | -1.56828713 |
| H  | 0.29647593  | 2.31646670  | -0.86647189 |
| H  | 0.07448005  | 1.59853236  | -2.22360185 |

**6F**

|    |             |             |             |
|----|-------------|-------------|-------------|
| C  | 0.61043101  | -0.81437235 | 2.58828663  |
| H  | -0.04244618 | -1.68756707 | 2.66193935  |
| H  | 1.00014999  | -0.56167549 | 3.58274539  |
| C  | 1.80087958  | -1.14177338 | 1.66074485  |
| H  | 2.45520513  | -0.26983661 | 1.57342491  |
| H  | 2.37177144  | -1.96718141 | 2.10473843  |
| C  | -0.20175978 | 0.38049599  | 2.07733378  |
| O  | 0.40389379  | 1.50262605  | 1.99041484  |
| O  | -1.40334723 | 0.19606235  | 1.74341620  |
| C  | 1.33388393  | -1.59649636 | 0.26939857  |
| O  | 0.60390680  | -2.60887530 | 0.19386024  |
| O  | 1.72375414  | -0.88130851 | -0.72631407 |
| O  | -1.02350016 | 3.31375775  | 0.61166482  |
| H  | -0.51982684 | 2.73836786  | 1.25410283  |
| H  | -0.36530712 | 3.60921338  | -0.03058117 |
| O  | 0.58216122  | -0.76168562 | -3.02729882 |
| H  | 1.22939710  | -0.93467523 | -3.71985424 |
| H  | 1.06164603  | -0.90440854 | -2.13842965 |
| O  | 1.97640304  | 1.77979285  | -0.27402256 |
| H  | 1.55421531  | 1.79010426  | 0.61173936  |
| H  | 2.07831978  | 0.81041487  | -0.44373395 |
| Na | -1.60070821 | 1.23015013  | -0.33576289 |
| O  | -1.20458978 | -2.62090829 | -1.85906476 |
| H  | -0.53291973 | -2.74573211 | -1.14200583 |
| H  | -0.73219340 | -2.06581309 | -2.50622627 |
| O  | -2.74079578 | -0.79784077 | -0.51081929 |
| H  | -2.40792139 | -0.89772987 | 0.39960830  |
| H  | -2.27868222 | -1.49841775 | -1.03561668 |
| O  | -0.13894378 | 1.77322062  | -2.04211315 |
| H  | 0.66357802  | 1.89524542  | -1.47865881 |
| H  | 0.05829084  | 0.97232808  | -2.56904361 |

**6G**

|    |             |             |             |
|----|-------------|-------------|-------------|
| C  | -2.31616018 | -1.42939278 | 1.30000018  |
| C  | -2.19259070 | 0.09096934  | 1.13343478  |
| C  | -0.68658979 | -1.91293118 | -0.56936506 |
| C  | -2.10624004 | -2.15690825 | -0.05365226 |
| H  | -2.24929855 | -3.23260974 | 0.09833614  |
| H  | -1.57912989 | -1.79373582 | 2.02289062  |
| H  | -3.32562697 | -1.65493602 | 1.66292539  |
| H  | -2.83545901 | -1.77780811 | -0.77582006 |
| O  | 0.24580476  | -2.61244886 | -0.10024457 |
| O  | -1.07624272 | 0.62264943  | 1.53414568  |
| O  | -3.11409754 | 0.72421717  | 0.59578720  |
| O  | -0.53917911 | -0.93838034 | -1.38931879 |
| Na | 0.66349479  | 0.54184184  | -0.10179325 |
| O  | -0.67954080 | 2.70491822  | 0.03249734  |
| H  | -1.46187408 | 2.77890788  | -0.52758073 |
| H  | -0.96303775 | 2.04615352  | 0.74076151  |
| O  | 2.49003025  | -1.18878725 | 0.33811151  |
| H  | 1.76171535  | -1.82532343 | 0.10895276  |
| H  | 2.25719542  | -0.81347829 | 1.21386485  |
| O  | 1.19628037  | -0.24457482 | -3.22322353 |
| H  | 0.58076087  | -0.65086389 | -2.54209911 |
| H  | 0.61914238  | 0.26004788  | -3.80773769 |
| O  | 2.80875847  | 0.92216461  | -1.33744619 |
| H  | 2.91889839  | 0.09894430  | -0.80283827 |
| H  | 2.35124097  | 0.62299148  | -2.15546524 |
| O  | 1.49586927  | 0.41000924  | 2.38222248  |
| H  | 1.73772358  | 1.28761822  | 2.02252450  |
| H  | 0.51373887  | 0.37281329  | 2.33472704  |
| O  | 1.99942468  | 2.63125855  | 0.68526869  |
| H  | 2.41588316  | 2.23322719  | -0.10912950 |
| H  | 1.13644583  | 2.98116004  | 0.39085830  |

**6H**

|    |             |             |             |
|----|-------------|-------------|-------------|
| C  | 0.12296657  | -1.54078507 | 1.86186271  |
| H  | -0.32462120 | -2.46605434 | 1.48774604  |
| H  | 0.32233048  | -1.63047433 | 2.93519136  |
| C  | 1.48041109  | -1.30232981 | 1.14772526  |
| H  | 1.96564805  | -0.43037659 | 1.59329199  |
| H  | 2.11087045  | -2.18356530 | 1.30273710  |
| C  | -0.84411656 | -0.37919275 | 1.61467693  |
| O  | -0.64675763 | 0.70483095  | 2.26316036  |
| O  | -1.74184879 | -0.52496573 | 0.74365179  |
| C  | 1.28899134  | -1.09468546 | -0.35475644 |
| O  | 1.22949723  | -2.09032767 | -1.10375190 |
| O  | 1.15232190  | 0.13224854  | -0.74353332 |
| O  | -1.25600573 | 2.64719608  | 0.29465556  |
| H  | -1.37076251 | 2.05089406  | 1.06848930  |
| H  | -0.31986717 | 2.90417701  | 0.37846340  |
| O  | -0.23749043 | -1.78811847 | -3.38528264 |
| H  | -0.01401906 | -0.88004005 | -3.65072624 |
| H  | 0.37174946  | -1.96690488 | -2.62512442 |
| O  | 1.47436583  | 2.15388244  | 1.10315636  |
| H  | 0.80804654  | 1.74866214  | 1.69184390  |
| H  | 1.53200742  | 1.47161972  | 0.39488231  |
| Na | -1.20090597 | 0.78311969  | -1.11302716 |
| O  | -2.46052232 | -1.02390266 | -1.94933482 |
| H  | -2.33452921 | -1.32794809 | -1.03327904 |
| H  | -1.75425574 | -1.45216404 | -2.48910434 |
| O  | 0.37297876  | 0.98536328  | -3.04296199 |
| H  | 0.86436091  | 0.61249206  | -2.24350658 |
| H  | 0.89190388  | 1.72354657  | -3.37967293 |
| O  | 1.55102254  | 0.76533640  | 4.00794485  |
| H  | 2.09623070  | 1.27435550  | 3.39231370  |
| H  | 0.69534401  | 0.67859028  | 3.53208560  |

**6I**

|    |             |             |             |
|----|-------------|-------------|-------------|
| C  | 1.65345217  | -0.08986295 | 2.16254795  |
| H  | 1.62851542  | -0.56335232 | 3.15469772  |
| H  | 2.42440711  | 0.68409575  | 2.17756975  |
| C  | 1.96461622  | -1.14697092 | 1.08947262  |
| H  | 3.00188605  | -1.48912500 | 1.21005264  |
| H  | 1.31628505  | -2.02156599 | 1.18678504  |
| C  | 0.31103037  | 0.61450203  | 1.94566810  |
| O  | 0.18396793  | 1.80342899  | 2.33328865  |
| O  | -0.61657693 | -0.04884271 | 1.36107855  |
| C  | 1.80961037  | -0.57065080 | -0.32618051 |
| O  | 1.26711305  | -1.32378903 | -1.20776077 |
| O  | 2.16984311  | 0.61811877  | -0.52266100 |
| O  | 0.06216527  | 1.97040149  | -1.52729812 |
| H  | -0.33552694 | 2.51752010  | -0.82041826 |
| H  | 0.93091665  | 1.63919680  | -1.18764766 |
| O  | -0.01028792 | -0.22100192 | -3.38686980 |
| H  | 0.67104977  | -0.64433080 | -2.81292198 |
| H  | 0.07189925  | 0.72484131  | -3.18199572 |
| O  | -1.24871857 | 3.21533249  | 0.64432169  |
| H  | -1.05420768 | 4.14242568  | 0.82045331  |
| H  | -0.77158114 | 2.68970152  | 1.36305780  |
| Na | -0.90074824 | -0.19962787 | -1.10295357 |
| O  | -2.78955600 | 0.83931118  | 0.13662581  |
| H  | -2.07392308 | 0.64180537  | 0.79665179  |
| H  | -2.74982714 | 1.80558119  | 0.06854911  |
| O  | 0.26340073  | -3.81693434 | -0.44279895 |
| H  | -0.65717252 | -3.54565587 | -0.31447181 |
| H  | 0.70362015  | -2.99488180 | -0.75464871 |
| O  | -2.00052790 | -2.02674744 | 0.18283109  |
| H  | -1.40724098 | -1.57269607 | 0.82180884  |
| H  | -2.82831187 | -1.52816234 | 0.22947617  |

**6J**

|    |             |             |             |
|----|-------------|-------------|-------------|
| C  | 1.97057337  | -0.17668976 | 2.05850289  |
| H  | 2.06228706  | -0.64349844 | 3.04963913  |
| H  | 2.60019354  | 0.71631483  | 2.05324203  |
| C  | 2.42943520  | -1.15962538 | 0.96993865  |
| H  | 3.51051317  | -1.32872366 | 1.07212782  |
| H  | 1.93349552  | -2.12877759 | 1.07458971  |
| C  | 0.51957073  | 0.29578647  | 1.89928883  |
| O  | 0.20281615  | 1.40480525  | 2.39485343  |
| O  | -0.28403807 | -0.46598650 | 1.25648631  |
| C  | 2.16738919  | -0.61090619 | -0.44264804 |
| O  | 1.72300856  | -1.43428800 | -1.31693425 |
| O  | 2.36398071  | 0.61392980  | -0.64140553 |
| O  | 0.04434191  | 1.78787120  | -1.45740014 |
| H  | -0.41758002 | 2.23959912  | -0.72038901 |
| H  | 0.95309232  | 1.56491464  | -1.14675161 |
| O  | 0.34144308  | -0.37633204 | -3.42797899 |
| H  | 1.05882979  | -0.73236331 | -2.84885641 |
| H  | 0.34047366  | 0.57713849  | -3.25020800 |
| O  | -1.38214793 | 2.71856153  | 0.77749739  |
| H  | -1.28456241 | 3.64522337  | 1.02379149  |
| H  | -0.87139694 | 2.19475094  | 1.47243882  |
| Na | -0.59991157 | -0.45571994 | -1.18251720 |
| O  | -4.09616040 | 1.77503423  | 0.51716515  |
| H  | -3.90814075 | 0.84295740  | 0.32264690  |
| H  | -3.20869160 | 2.16602291  | 0.62531037  |
| O  | -0.40287837 | -2.77936875 | -0.19544266 |
| H  | -0.27806522 | -2.15641415 | 0.55224100  |
| H  | 0.43362588  | -2.64482234 | -0.69267018 |
| O  | -2.66417218 | -0.74210985 | 0.10170709  |
| H  | -1.96655272 | -0.50573433 | 0.76325049  |
| H  | -2.58463815 | -1.70199977 | 0.00902078  |

**6K**

|    |             |             |             |
|----|-------------|-------------|-------------|
| C  | 0.86993301  | -0.49808850 | 2.60420247  |
| H  | 0.03453631  | -1.19820218 | 2.70726344  |
| H  | 1.34165324  | -0.33984137 | 3.57992473  |
| C  | 1.92213928  | -1.10122971 | 1.63514537  |
| H  | 2.74201664  | -0.38817178 | 1.50465067  |
| H  | 2.30515548  | -2.03576320 | 2.05966220  |
| C  | 0.38627392  | 0.85546360  | 2.06667284  |
| O  | 1.13063289  | 1.84723002  | 2.22498237  |
| O  | -0.72050084 | 0.86034680  | 1.41168586  |
| C  | 1.26665746  | -1.40754270 | 0.29094972  |
| O  | 0.53762539  | -2.43122521 | 0.20903383  |
| O  | 1.40255841  | -0.54632460 | -0.64942110 |
| O  | -0.75876045 | 2.83427208  | -0.45934853 |
| H  | -0.79569400 | 2.32277984  | 0.38993385  |
| H  | 0.19621721  | 2.75106064  | -0.68487818 |
| O  | 1.13451766  | -1.06490928 | -3.25645189 |
| H  | 1.17497823  | -0.19445243 | -3.66891577 |
| H  | 1.29721378  | -0.90161403 | -2.28666449 |
| O  | 1.94026686  | 2.19028927  | -0.44868633 |
| H  | 1.83751035  | 2.30868918  | 0.51822168  |
| H  | 1.86515046  | 1.21571236  | -0.54879229 |
| Na | -1.17297530 | -0.61746775 | -0.50787200 |
| O  | -1.03030804 | -2.43906198 | -2.07307940 |
| H  | -0.41663718 | -2.69376566 | -1.34673806 |
| H  | -0.43711095 | -2.05666065 | -2.74686954 |
| O  | -3.19900160 | -0.16746807 | 0.84517094  |
| H  | -2.45018658 | 0.23182478  | 1.33630899  |
| H  | -3.33455271 | 0.42900762  | 0.09078637  |
| O  | -2.33851989 | 1.13700892  | -1.61327568 |
| H  | -1.73503981 | 1.88738994  | -1.30558757 |
| H  | -2.49480992 | 1.23534759  | -2.55739847 |

**6L**

|    |             |             |             |
|----|-------------|-------------|-------------|
| C  | 1.56898942  | -0.65512215 | 2.08117167  |
| H  | 1.49817768  | -1.57129517 | 2.68492151  |
| H  | 2.09991385  | 0.10321257  | 2.66023889  |
| C  | 2.31718303  | -0.95817691 | 0.76404827  |
| H  | 3.38081792  | -1.11245313 | 0.98928753  |
| H  | 1.93180248  | -1.86767343 | 0.29699015  |
| C  | 0.15236582  | -0.13676065 | 1.83088004  |
| O  | -0.32213058 | 0.76608697  | 2.56108741  |
| O  | -0.47720092 | -0.64317381 | 0.82747041  |
| C  | 2.18184800  | 0.21961280  | -0.21880403 |
| O  | 1.81016584  | -0.02716456 | -1.40989008 |
| O  | 2.37402046  | 1.37497876  | 0.25197826  |
| O  | 0.50400773  | 3.04670051  | -0.75669854 |
| H  | -0.09084587 | 3.05372972  | 0.01022541  |
| H  | 1.32569216  | 2.58056606  | -0.44775686 |
| O  | 0.21730960  | -1.99430115 | -2.36619772 |
| H  | 0.05441704  | -2.59086336 | -1.61066107 |
| H  | 0.91506239  | -1.36896785 | -2.04336140 |
| O  | -3.01828891 | -0.21985216 | 0.04112861  |
| H  | -3.06064913 | 0.73032267  | 0.23800798  |
| H  | -2.15895235 | -0.46128258 | 0.46731159  |
| Na | -0.37864519 | 0.88734336  | -1.10017877 |
| O  | -1.75471212 | 2.20911946  | 0.90608864  |
| H  | -1.30299113 | 1.66569413  | 1.62820239  |
| H  | -2.13062311 | 2.98322557  | 1.33982981  |
| O  | -0.32824761 | -3.21382620 | 0.13924994  |
| H  | -0.32379989 | -2.26766418 | 0.44869360  |
| H  | -1.24861693 | -3.49351997 | 0.21081531  |
| O  | -1.85578407 | -0.19862356 | -2.52823708 |
| H  | -1.21235432 | -0.94788818 | -2.57279983 |
| H  | -2.43568656 | -0.36947905 | -1.75860431 |



**6M**

|    |             |             |             |
|----|-------------|-------------|-------------|
| C  | -1.91002581 | -1.32873199 | 0.15814056  |
| H  | -2.82717044 | -0.73305585 | 0.17301938  |
| H  | -2.14057119 | -2.37430774 | 0.39132011  |
| C  | -1.28495944 | -1.26988391 | -1.26199875 |
| H  | -0.36125242 | -1.85430371 | -1.28525017 |
| H  | -2.00081714 | -1.70641418 | -1.96668968 |
| C  | -0.92452314 | -0.80128605 | 1.19967706  |
| O  | 0.06482623  | -1.53933165 | 1.50246304  |
| O  | -1.08246314 | 0.37197610  | 1.65818206  |
| C  | -1.02797427 | 0.18555294  | -1.66827532 |
| O  | -2.01900560 | 0.91097658  | -1.92047075 |
| O  | 0.18888570  | 0.59569127  | -1.64997723 |
| Na | 0.51006436  | 1.84813183  | 0.39648006  |
| O  | 0.59159305  | 3.30006909  | -1.53620970 |
| H  | 0.41201158  | 2.39267300  | -1.88435580 |
| H  | -0.28253331 | 3.61932489  | -1.26941136 |
| O  | -1.83129252 | 2.63683788  | 0.21101346  |
| H  | -2.04869306 | 2.18922257  | -0.63841759 |
| H  | -1.89094254 | 1.90351577  | 0.85556465  |
| O  | 2.05221267  | -0.17577597 | 0.15573158  |
| H  | 1.50202424  | -0.07424920 | -0.65918740 |
| H  | 1.49934650  | -0.74971542 | 0.72840344  |
| O  | 1.23214716  | 1.47703703  | 2.65381326  |
| H  | 0.40113612  | 0.94943601  | 2.59178311  |
| H  | 1.91838970  | 0.87317770  | 2.33542716  |
| O  | 0.59481465  | -3.81238512 | 0.20399888  |
| H  | 0.33374428  | -2.99156395 | 0.70451370  |
| H  | 0.87285854  | -4.44258284 | 0.87902905  |
| O  | 3.18789248  | -2.80351279 | -0.62959139 |
| H  | 2.31006015  | -3.19979029 | -0.47021789 |
| H  | 3.05618349  | -1.85848010 | -0.43995214 |

**6N**

|    |             |             |             |
|----|-------------|-------------|-------------|
| C  | 0.89069900  | -1.34629410 | 2.14275751  |
| H  | 0.64068438  | -2.35226011 | 1.79498390  |
| H  | 0.99517865  | -1.38035612 | 3.23673421  |
| C  | 2.21728223  | -0.87843090 | 1.51464802  |
| H  | 2.44298728  | 0.13875807  | 1.84270566  |
| H  | 3.01759009  | -1.55788618 | 1.83442700  |
| C  | -0.27889842 | -0.40568717 | 1.83150996  |
| O  | -0.02440880 | 0.83615048  | 1.77212213  |
| O  | -1.42314276 | -0.91552494 | 1.62307027  |
| C  | 2.14287714  | -0.92605794 | -0.01722874 |
| O  | 1.97357008  | -2.04805539 | -0.55520929 |
| O  | 2.23474723  | 0.19096472  | -0.63961716 |
| O  | -1.49270536 | 2.95438531  | 1.12687027  |
| H  | -0.93493741 | 2.23613973  | 1.52921214  |
| H  | -0.97368864 | 3.22157337  | 0.35276975  |
| O  | -3.53128488 | 0.89267430  | 1.23842849  |
| H  | -3.11222029 | 1.75133572  | 1.41820111  |
| H  | -2.90537959 | 0.22110944  | 1.59562822  |
| O  | 0.42012264  | -1.96622332 | -2.77047093 |
| H  | 1.06061317  | -2.09586998 | -2.02264538 |
| H  | 0.70852559  | -1.11808510 | -3.15536334 |
| Na | -1.60243829 | 0.78741769  | -0.26497002 |
| O  | -1.73823762 | -1.25523067 | -1.27821013 |
| H  | -1.62449110 | -1.66494364 | -0.40483547 |
| H  | -0.99248546 | -1.57853330 | -1.84759373 |
| O  | 1.57573382  | 0.60832485  | -3.08086756 |
| H  | 1.93695207  | 0.34603108  | -2.15955913 |
| H  | 2.34158733  | 0.78360559  | -3.63867285 |
| O  | 0.21555080  | 2.05215878  | -1.05749520 |
| H  | 0.88162019  | 1.56305892  | -0.52426856 |
| H  | 0.51024963  | 1.86350720  | -1.96712357 |

**6O**

|    |             |             |             |
|----|-------------|-------------|-------------|
| C  | 0.66502116  | -1.59154965 | 2.14536347  |
| H  | 0.33139130  | -2.60718622 | 1.91904019  |
| H  | 0.86891876  | -1.53596442 | 3.22483324  |
| C  | 1.94289869  | -1.26224549 | 1.36314016  |
| H  | 2.31947652  | -0.27118493 | 1.63050559  |
| H  | 2.72449581  | -1.98746920 | 1.63043696  |
| C  | -0.50400178 | -0.64250466 | 1.86227945  |
| O  | -0.23907821 | 0.56993872  | 1.56911014  |
| O  | -1.67531500 | -1.11394334 | 1.91931447  |
| C  | 1.76028618  | -1.33921642 | -0.16645870 |
| O  | 0.94331237  | -2.17186130 | -0.62625821 |
| O  | 2.47429938  | -0.53766241 | -0.86312943 |
| O  | -1.12424916 | 3.03780085  | 0.73616953  |
| H  | -0.96754644 | 2.30166310  | 1.36047481  |
| H  | -0.24201078 | 3.23314760  | 0.38790867  |
| O  | -3.54443030 | 0.29667683  | 0.55815404  |
| H  | -3.77005354 | -0.40392911 | -0.06798028 |
| H  | -2.94530605 | -0.15039356 | 1.21421429  |
| O  | 1.69711517  | 1.89292605  | 0.15733120  |
| H  | 1.12035346  | 1.41217552  | 0.79353915  |
| H  | 2.22203601  | 1.15309433  | -0.22921307 |
| Na | -1.48060126 | 0.89912234  | -0.51438653 |
| O  | -1.65606654 | -1.46147010 | -0.96433240 |
| H  | -1.78344035 | -1.70418525 | -0.03071111 |
| H  | -0.73171163 | -1.76084365 | -1.12594815 |
| O  | 1.62278009  | -0.07823273 | -3.34118833 |
| H  | 1.95049568  | -0.40080852 | -2.44860507 |
| H  | 2.38041150  | 0.36721830  | -3.73808944 |
| O  | -0.01346490 | 1.75990806  | -2.06785665 |
| H  | 0.64267909  | 1.95706837  | -1.36462494 |
| H  | 0.45478715  | 1.11780719  | -2.64798735 |

**6P**

|    |             |             |             |
|----|-------------|-------------|-------------|
| C  | -1.33100834 | -1.54324781 | 1.43978130  |
| C  | -1.84667060 | -0.25865487 | 0.78190630  |
| C  | 0.52095648  | -2.01316990 | -0.23988879 |
| C  | -0.76214615 | -2.54434884 | 0.40640602  |
| H  | -0.53950500 | -3.49141342 | 0.90768651  |
| H  | -0.57122115 | -1.30652330 | 2.19161535  |
| H  | -2.18278086 | -2.01787822 | 1.94328005  |
| H  | -1.51955158 | -2.70133266 | -0.36929581 |
| O  | 1.62433229  | -2.49603101 | 0.10477764  |
| O  | -2.81626812 | -0.35209103 | -0.00479654 |
| O  | -1.24716681 | 0.83890290  | 1.08624264  |
| O  | 0.35449785  | -1.06336998 | -1.08718408 |
| Na | 0.57349273  | 1.19021666  | -0.56029341 |
| O  | -1.21159865 | 2.76266281  | -0.84297136 |
| H  | -1.91607215 | 2.47203236  | -1.45744893 |
| H  | -1.43856437 | 2.25555723  | -0.02948983 |
| O  | 3.65131993  | -0.67264451 | -0.20638799 |
| H  | 2.99320456  | -1.40636982 | -0.09713754 |
| H  | 3.47301900  | -0.33638936 | -1.10137337 |
| O  | -3.40202010 | 1.41144352  | -1.92680124 |
| H  | -4.22284454 | 1.82145171  | -1.63104273 |
| H  | -3.18778574 | 0.73342456  | -1.22259436 |
| O  | 2.08455154  | 0.28965930  | -2.39273132 |
| H  | 1.47723845  | -0.41197771 | -1.98258429 |
| H  | 1.95407680  | 0.25384039  | -3.34616965 |
| O  | 2.29711643  | 1.42646323  | 0.95646115  |
| H  | 2.87803193  | 0.67348537  | 0.69274447  |
| H  | 1.86833480  | 1.19055774  | 1.80363616  |
| O  | 0.51099711  | 0.96149977  | 3.06010359  |
| H  | -0.19902378 | 0.88495125  | 2.35791765  |
| H  | 0.34238235  | 1.79918762  | 3.50649531  |

**Table S9.** The Cartesian atomic coordinates of the typical low-lying isomers of  $\text{Na}^+(\text{DC}_2^{2-})(\text{H}_2\text{O})_7$  using B3LYP exchange-correlation functional with dispersion correction.

| <b>7A</b> |             |             |             | <b>7B</b> |             |             |             |
|-----------|-------------|-------------|-------------|-----------|-------------|-------------|-------------|
| C         | -2.24694843 | -0.21485323 | 1.56954001  | C         | -2.24203639 | 0.58074227  | -1.43272732 |
| H         | -2.97771462 | 0.42284582  | 1.06562170  | H         | -2.99926670 | 0.06198604  | -0.83916329 |
| H         | -2.59328052 | -0.36795443 | 2.60115269  | H         | -2.67025855 | 0.76522446  | -2.42778226 |
| C         | -2.12490144 | -1.57600115 | 0.86338993  | C         | -1.86037685 | 1.92060914  | -0.79026355 |
| H         | -1.58533592 | -2.29485671 | 1.48598861  | H         | -1.28933246 | 2.53794853  | -1.48982576 |
| H         | -3.12747365 | -1.98938380 | 0.68691885  | H         | -2.76959896 | 2.48569950  | -0.54417408 |
| C         | -0.91753680 | 0.54746292  | 1.62732676  | C         | -1.04834548 | -0.36254756 | -1.60392200 |
| O         | 0.15008768  | -0.14230308 | 1.77087675  | O         | 0.08136755  | 0.14433225  | -1.90205031 |
| O         | -0.93575513 | 1.79979549  | 1.48237679  | O         | -1.23407174 | -1.59495288 | -1.38270975 |
| C         | -1.41026284 | -1.48253739 | -0.49377107 | C         | -1.03403259 | 1.80114456  | 0.50189197  |
| O         | -1.46917676 | -0.38732344 | -1.12717306 | O         | -1.03899065 | 0.69854413  | 1.13417487  |
| O         | -0.74915966 | -2.48679677 | -0.89591287 | O         | -0.36876617 | 2.82060355  | 0.84478346  |
| O         | 2.73242817  | 0.82425478  | 1.50468508  | O         | 2.43748056  | -1.23966906 | -1.49807651 |
| H         | 1.85968129  | 0.50885526  | 1.83243686  | H         | 1.65377969  | -0.75560402 | -1.84957157 |
| H         | 2.99978731  | 0.14485359  | 0.85460209  | H         | 2.82364112  | -0.63968495 | -0.83532668 |
| O         | 1.31503325  | 2.76475981  | 0.20831185  | O         | 0.79352486  | -3.25723592 | -0.57657875 |
| H         | 2.03601829  | 2.28845271  | 0.67535767  | H         | 1.57633391  | -2.78723588 | -0.92975195 |
| H         | 0.52138886  | 2.58835214  | 0.76692901  | H         | 0.03921156  | -2.80592790 | -1.02146077 |
| O         | 1.08852955  | -2.70755026 | 1.15987075  | O         | 1.46562308  | 2.48637097  | -1.29505376 |
| H         | 0.70373889  | -1.90754641 | 1.57666347  | H         | 0.90300363  | 1.77292104  | -1.66651624 |
| H         | 0.43450757  | -2.92121291 | 0.45925829  | H         | 0.88747650  | 2.92065216  | -0.63780088 |
| Na        | 0.81809550  | 0.39198047  | -0.51994758 | Na        | 0.66869649  | -0.82465831 | 0.42621162  |
| O         | -2.20505169 | 2.19409731  | -1.05631647 | O         | -2.38515108 | -1.68827107 | 1.17993794  |
| H         | -1.91432628 | 2.36602431  | -0.14122817 | H         | -2.22278080 | -1.88208115 | 0.23566376  |
| H         | -2.18635722 | 1.21083680  | -1.08711574 | H         | -2.09905493 | -0.75016718 | 1.24316322  |
| O         | 1.01373197  | -1.10991262 | -2.57596476 | O         | 1.22683734  | 1.69444664  | 2.76330918  |
| H         | 0.30739702  | -1.67248885 | -2.17406144 | H         | 0.68380111  | 2.26901728  | 2.16423098  |
| H         | 0.56812685  | -0.29122473 | -2.84767903 | H         | 0.60349411  | 0.97289648  | 2.93430545  |
| O         | 2.75717312  | -1.20259268 | -0.41016818 | O         | 2.52091156  | 0.69941250  | 0.53911303  |
| H         | 2.27874970  | -1.87462402 | 0.13655977  | H         | 2.27601432  | 1.41631771  | -0.09316413 |
| H         | 2.38391688  | -1.27293198 | -1.31202054 | H         | 2.26039646  | 1.04329574  | 1.42583836  |
| O         | 0.33771619  | 1.98322208  | -2.29705397 | O         | 0.15969190  | -2.49515200 | 2.03982865  |
| H         | 0.82788016  | 2.52279867  | -1.64624302 | H         | 0.41285074  | -3.06024468 | 1.28224051  |
| H         | -0.60064487 | 2.13391204  | -2.04289650 | H         | -0.80447819 | -2.34502583 | 1.91912849  |

**7C**

|    |             |             |             |
|----|-------------|-------------|-------------|
| C  | -0.84049074 | 2.91660824  | -0.05445439 |
| H  | -0.95217930 | 2.97477398  | -1.14142917 |
| H  | -0.83740886 | 3.93011089  | 0.36346913  |
| C  | -2.03832794 | 2.13965223  | 0.55067706  |
| H  | -1.95330104 | 2.15124428  | 1.64074968  |
| H  | -2.96813572 | 2.62812967  | 0.23860518  |
| C  | 0.48930202  | 2.23615366  | 0.29508629  |
| O  | 0.87668601  | 2.25285766  | 1.48487184  |
| O  | 1.09011121  | 1.62818790  | -0.66605946 |
| C  | -2.04298689 | 0.68888315  | 0.06231130  |
| O  | -2.48860464 | 0.44327889  | -1.09802737 |
| O  | -1.52888181 | -0.18595702 | 0.82974132  |
| Na | 0.64339855  | -0.68528096 | -0.00029931 |
| O  | -0.07767369 | 0.01057218  | -2.43024225 |
| H  | -1.02580693 | 0.05631564  | -2.19161124 |
| H  | 0.32000237  | 0.78928290  | -1.96936544 |
| O  | -2.59080466 | -2.35145983 | -0.75396834 |
| H  | -2.58534388 | -1.44516385 | -1.13951276 |
| H  | -2.60712382 | -2.11720996 | 0.18728017  |
| O  | 3.15899505  | -0.14410104 | -0.53567146 |
| H  | 3.09078822  | -0.29695103 | 0.43035809  |
| H  | 2.60911709  | 0.66789171  | -0.64393739 |
| O  | 2.12334440  | -0.13866310 | 1.98967483  |
| H  | 1.44295311  | -0.73923248 | 2.36008881  |
| H  | 1.73624464  | 0.77166691  | 1.94486900  |
| O  | -0.00663351 | -1.87243670 | 2.35046073  |
| H  | 0.04152137  | -2.49938859 | 1.59894337  |
| H  | -0.70514333 | -1.24262028 | 2.08555853  |
| O  | 1.74423734  | -2.00511310 | -1.99285311 |
| H  | 2.42679240  | -1.43578681 | -1.56878446 |
| H  | 1.10409043  | -1.37167389 | -2.38473226 |
| O  | 0.03411785  | -3.10008253 | -0.16523923 |
| H  | 0.69172030  | -2.94742977 | -0.88112560 |
| H  | -0.85841355 | -2.94493069 | -0.54934533 |

**7D**

|    |             |             |             |
|----|-------------|-------------|-------------|
| C  | -0.27196402 | -2.25360770 | 1.75403668  |
| H  | -1.26738487 | -2.01219100 | 2.13744917  |
| H  | 0.19042538  | -3.00723653 | 2.40153730  |
| C  | -0.40130626 | -2.84721396 | 0.32448326  |
| H  | 0.57679540  | -3.20139698 | -0.01174946 |
| H  | -1.09351809 | -3.69502303 | 0.36761624  |
| C  | 0.60500416  | -0.99590291 | 1.75906433  |
| O  | 1.84643278  | -1.12965848 | 1.60354623  |
| O  | 0.00482126  | 0.13265170  | 1.84251917  |
| C  | -0.96180022 | -1.80920994 | -0.66342736 |
| O  | -2.18575705 | -1.55963979 | -0.63573783 |
| O  | -0.10800871 | -1.20602690 | -1.41491862 |
| Na | 0.09536458  | 0.87377940  | -0.32855017 |
| O  | -2.76044701 | 0.15339742  | 1.45185592  |
| H  | -2.77277630 | -0.56232386 | 0.78116289  |
| H  | -1.83462698 | 0.13440260  | 1.78254506  |
| O  | -0.68230236 | 1.30017414  | -2.61926032 |
| H  | -0.65010191 | 0.32591655  | -2.49304189 |
| H  | -1.41224780 | 1.60457136  | -2.04175379 |
| O  | 2.61207398  | 0.70515126  | -0.26432347 |
| H  | 2.46499775  | 0.28672171  | 0.61720276  |
| H  | 2.77056353  | -0.08575308 | -0.82580208 |
| O  | 0.10604975  | 2.96283545  | 1.27631119  |
| H  | 0.69654414  | 3.08530199  | 0.50532132  |
| H  | 0.33812315  | 2.11728523  | 1.70605226  |
| O  | 1.34294449  | 2.89075954  | -1.27251097 |
| H  | 0.75997351  | 2.50555534  | -1.95671204 |
| H  | 2.00675511  | 2.19906996  | -1.06275920 |
| O  | 2.51294520  | -1.91019700 | -1.13342719 |
| H  | 2.49174866  | -2.01720987 | -0.16573066 |
| H  | 1.55993253  | -1.75115629 | -1.35145098 |
| O  | -2.06017617 | 2.13418635  | -0.30707668 |
| H  | -1.49401468 | 2.65862184  | 0.29472294  |
| H  | -2.50670902 | 1.48057983  | 0.28497772  |

| 7E |             |             | 7F          |    |             |             |             |
|----|-------------|-------------|-------------|----|-------------|-------------|-------------|
| C  | -1.16492393 | 1.07026649  | -2.16728300 | C  | 1.36281590  | 2.40476100  | 0.67157946  |
| H  | -1.22761926 | 0.12866268  | -2.71809369 | H  | 2.40668455  | 2.20933762  | 0.40887425  |
| H  | -1.37955325 | 1.90399924  | -2.84416958 | H  | 1.31571165  | 3.23722888  | 1.38304003  |
| C  | -2.22403967 | 1.07648649  | -1.02846543 | C  | 0.57846488  | 2.80184245  | -0.60934909 |
| H  | -2.30737335 | 2.08562243  | -0.61587062 | H  | -0.42431301 | 3.13550000  | -0.32724976 |
| H  | -3.18972947 | 0.77590180  | -1.44986203 | H  | 1.11125029  | 3.62344522  | -1.09903385 |
| C  | 0.24525856  | 1.23990987  | -1.59291148 | C  | 0.76927831  | 1.15613117  | 1.32691369  |
| O  | 0.62981135  | 2.39861943  | -1.28279904 | O  | -0.33823079 | 1.25073121  | 1.92882183  |
| O  | 0.92066191  | 0.17341488  | -1.38877753 | O  | 1.38958551  | 0.05502478  | 1.15613692  |
| C  | -1.84028658 | 0.10566294  | 0.09353545  | C  | 0.49127479  | 1.61128994  | -1.57884035 |
| O  | -2.00440773 | -1.13339035 | -0.09855595 | O  | 1.45056444  | 1.39034237  | -2.34492396 |
| O  | -1.31075259 | 0.60879905  | 1.13631403  | O  | -0.56020400 | 0.87605302  | -1.46245958 |
| Na | 1.02242209  | -0.17388914 | 1.06911945  | Na | -0.67854888 | -0.86022132 | 0.18584976  |
| O  | 0.66305561  | -4.18661703 | -0.74549405 | O  | 2.04371393  | -2.63677478 | 1.46284441  |
| H  | 0.32906317  | -3.47089203 | -1.35657718 | H  | 2.78527638  | -2.40250889 | 0.88707142  |
| H  | 0.05666691  | -4.92816385 | -0.85316600 | H  | 1.65839146  | -1.76544382 | 1.68799695  |
| O  | -0.36925977 | -2.13329680 | -2.11081319 | O  | -1.76111876 | -1.49408714 | -2.08996966 |
| H  | -1.12988593 | -1.89810326 | -1.53759716 | H  | -1.06153912 | -2.14525501 | -1.89772833 |
| H  | 0.22636665  | -1.35841310 | -1.96017593 | H  | -1.28438646 | -0.63681867 | -2.17817404 |
| O  | -0.71472029 | 3.31762345  | 1.12774238  | O  | -1.35290032 | -1.32926905 | 2.46043074  |
| H  | -1.03114637 | 2.39071874  | 1.22353487  | H  | -2.20451799 | -1.28061990 | 1.98960211  |
| H  | -0.39170467 | 3.33031415  | 0.20954947  | H  | -1.02472333 | -0.40545473 | 2.51671240  |
| O  | 1.90588704  | 2.12110055  | 1.09501474  | O  | -3.19843687 | -0.95113151 | 0.28562901  |
| H  | 1.63460508  | 2.28099969  | 0.15668775  | H  | -3.16834534 | 0.03499471  | 0.26161006  |
| H  | 1.23590758  | 2.62829215  | 1.58622699  | H  | -2.95275050 | -1.24015266 | -0.61718176 |
| O  | 3.28895249  | -0.12417736 | 0.05933332  | O  | -2.52025839 | 1.70114545  | 0.21998667  |
| H  | 2.65059066  | 0.03428142  | -0.66929895 | H  | -1.88194244 | 1.52927170  | -0.51644576 |
| H  | 3.31405663  | 0.72561042  | 0.52736983  | H  | -1.92168955 | 1.75658513  | 0.99052084  |
| O  | 0.01732287  | -0.51653454 | 3.33952316  | O  | 2.52581641  | -0.85954448 | -1.14408107 |
| H  | 0.04244354  | -1.42545870 | 2.99026128  | H  | 2.26936717  | -0.40723734 | -0.30648245 |
| H  | -0.67594274 | -0.10109555 | 2.78807536  | H  | 2.29459996  | -0.18983743 | -1.82301203 |
| O  | 0.02244547  | -2.37197778 | 1.28168404  | O  | 0.51398161  | -2.65638174 | -0.89926860 |
| H  | -0.80786107 | -2.03870217 | 0.86198419  | H  | 1.26037334  | -2.06014040 | -1.16779287 |
| H  | 0.33323612  | -3.10746546 | 0.71411417  | H  | 0.83722609  | -3.02482710 | -0.05448518 |

**7G**

|    |             |             |             |
|----|-------------|-------------|-------------|
| C  | -2.26045208 | 1.12613818  | -1.10299870 |
| H  | -1.90482391 | 1.53545001  | -2.05168029 |
| H  | -3.25907041 | 1.54926610  | -0.92679817 |
| C  | -2.36439917 | -0.40272302 | -1.17861558 |
| H  | -2.96274992 | -0.79475618 | -0.35288505 |
| H  | -2.86861305 | -0.68469805 | -2.11356666 |
| C  | -1.34032681 | 1.64091904  | 0.01853192  |
| O  | -1.20702480 | 0.91349964  | 1.05531316  |
| O  | -0.77620504 | 2.75034617  | -0.17084165 |
| C  | -1.00529523 | -1.10812607 | -1.16017069 |
| O  | -0.05005485 | -0.59515257 | -1.82173588 |
| O  | -0.91219156 | -2.16766341 | -0.47045065 |
| Na | 0.35749832  | -0.96668086 | 1.48794423  |
| O  | 0.60963548  | 2.06332368  | -2.58174673 |
| H  | 0.01481889  | 2.55393761  | -1.98238658 |
| H  | 0.36245149  | 1.13020078  | -2.41172765 |
| O  | 1.38636573  | -3.01893105 | 0.67664545  |
| H  | 2.09222935  | -2.73344087 | 0.07492469  |
| H  | 0.57926200  | -2.94230547 | 0.11793802  |
| O  | 0.59788716  | 0.86017141  | 3.13084041  |
| H  | 1.45837394  | 0.94153677  | 2.69439709  |
| H  | -0.05281658 | 1.18475739  | 2.46820951  |
| O  | -1.99347818 | -1.59337666 | 2.02357830  |
| H  | -1.85822848 | -2.03367093 | 1.16079825  |
| H  | -2.02365411 | -0.64662096 | 1.77933821  |
| O  | 1.96072257  | 2.65858030  | -0.11287380 |
| H  | 1.02222610  | 2.81948826  | 0.13772883  |
| H  | 1.87259311  | 2.48238472  | -1.06939322 |
| O  | 2.42281607  | -1.42342881 | -1.43771166 |
| H  | 1.46753797  | -1.17231018 | -1.63420263 |
| H  | 2.94397463  | -1.14931476 | -2.20027854 |
| O  | 2.37158464  | 0.16463377  | 0.87401084  |
| H  | 2.58589488  | -0.38264546 | 0.09329675  |
| H  | 2.27605553  | 1.08627237  | 0.52363055  |

**7H**

|    |             |             |             |
|----|-------------|-------------|-------------|
| C  | 1.78821102  | -0.98732707 | -1.91951474 |
| H  | 1.05665659  | -1.23517115 | -2.69321991 |
| H  | 2.73767968  | -1.45619837 | -2.21382722 |
| C  | 1.98157754  | 0.52690618  | -1.81814320 |
| H  | 2.84703486  | 0.76815675  | -1.19327057 |
| H  | 2.18791724  | 0.94867715  | -2.81143255 |
| C  | 1.33911016  | -1.64944745 | -0.60808231 |
| O  | 1.68403051  | -1.09902755 | 0.48610995  |
| O  | 0.65072551  | -2.70237143 | -0.69754720 |
| C  | 0.78703363  | 1.29406873  | -1.23974896 |
| O  | -0.34104172 | 0.69529819  | -1.16377145 |
| O  | 1.00033777  | 2.46449317  | -0.82837854 |
| Na | -0.06940074 | 0.60967552  | 1.48743233  |
| O  | -1.50245374 | -1.66510982 | -2.21841832 |
| H  | -0.77180529 | -2.27676755 | -2.00364407 |
| H  | -1.12774508 | -0.80624624 | -1.93043254 |
| O  | -0.77064189 | 2.90993761  | 1.21378473  |
| H  | -1.65859191 | 2.82300498  | 0.83461745  |
| H  | -0.17737242 | 2.95063570  | 0.42777001  |
| O  | 0.23143895  | -1.48985590 | 2.72526332  |
| H  | -0.59042872 | -1.93526044 | 2.48014243  |
| H  | 0.83875520  | -1.61501889 | 1.95709055  |
| O  | 2.28729802  | 1.34922041  | 1.54035031  |
| H  | 2.13919077  | 1.99547391  | 0.82992613  |
| H  | 2.34266410  | 0.48190678  | 1.08444110  |
| O  | -1.81115520 | -2.58268505 | 0.48749629  |
| H  | -0.85702656 | -2.74374383 | 0.29649891  |
| H  | -2.12874214 | -2.33069033 | -0.40097783 |
| O  | -2.68481975 | 1.71739274  | -0.56448175 |
| H  | -1.78144729 | 1.40619995  | -0.86998343 |
| H  | -3.27244404 | 1.66541776  | -1.32612366 |
| O  | -2.33753381 | -0.07091719 | 1.58153548  |
| H  | -2.70349099 | 0.46220788  | 0.85154581  |
| H  | -2.23182623 | -0.98298138 | 1.23510831  |

| <b>7I</b> |             |             | <b>7J</b>   |    |             |             |             |
|-----------|-------------|-------------|-------------|----|-------------|-------------|-------------|
| C         | -0.35206487 | -1.42457762 | -2.33883857 | C  | -1.18518839 | -1.91548649 | -1.61154803 |
| H         | -1.44395981 | -1.43874812 | -2.38634918 | H  | -1.68645747 | -2.57499990 | -0.89704459 |
| H         | 0.01012472  | -2.15110128 | -3.07936933 | H  | -1.06507378 | -2.49089822 | -2.53958704 |
| C         | 0.18670301  | -0.03031893 | -2.67745208 | C  | -2.03701619 | -0.66989703 | -1.87494660 |
| H         | 1.26658810  | -0.05828012 | -2.84451643 | H  | -1.63876215 | -0.09012265 | -2.71153343 |
| H         | -0.28274061 | 0.32299854  | -3.60598158 | H  | -3.05516842 | -0.98278013 | -2.14463134 |
| C         | 0.06614682  | -1.93433954 | -0.95263266 | C  | 0.22505079  | -1.64262342 | -1.06494734 |
| O         | 1.13537568  | -1.47821395 | -0.43847383 | O  | 0.72839985  | -0.48219056 | -1.20755354 |
| O         | -0.69731007 | -2.77355610 | -0.39672600 | O  | 0.79001889  | -2.61519741 | -0.49140510 |
| C         | -0.10111393 | 1.01116915  | -1.58895933 | C  | -2.13963130 | 0.24358419  | -0.64931696 |
| O         | -1.22518485 | 0.97232728  | -0.99411079 | O  | -2.28886326 | -0.28732815 | 0.48985149  |
| O         | 0.81727949  | 1.84611915  | -1.33872305 | O  | -2.04032987 | 1.49563260  | -0.84791100 |
| Na        | 1.39830771  | 0.65664052  | 0.98948541  | Na | 0.37233169  | 1.70811006  | -0.05770648 |
| O         | -3.09515579 | -1.27613826 | -0.30544678 | O  | -0.72742964 | -2.21852578 | 1.89704541  |
| H         | -2.42191074 | -1.96445419 | -0.47167663 | H  | -0.23709067 | -2.63845894 | 1.16610199  |
| H         | -2.65864063 | -0.46233839 | -0.61579568 | H  | -1.42808731 | -1.71979859 | 1.42957206  |
| O         | 1.19769120  | 3.06204978  | 1.07589177  | O  | -1.23529121 | 3.26994756  | 1.03358245  |
| H         | 0.27521864  | 3.26150536  | 1.32829363  | H  | -1.13713213 | 2.79842019  | 1.87179863  |
| H         | 1.09711949  | 2.87927160  | 0.11669482  | H  | -1.78023839 | 2.67887084  | 0.46215880  |
| O         | 1.62510524  | -1.46308960 | 2.21527524  | O  | 2.20117622  | 2.16220263  | 1.36847081  |
| H         | 0.79312543  | -1.65588322 | 2.66943561  | H  | 1.61048410  | 1.82534806  | 2.05749256  |
| H         | 1.46496603  | -1.74480651 | 1.28223557  | H  | 2.66255073  | 1.36037223  | 1.00772818  |
| O         | 3.12509440  | 0.42395139  | -0.77026808 | O  | 3.10522482  | -0.07531884 | 0.18319859  |
| H         | 2.53325321  | 1.07579683  | -1.19729131 | H  | 3.10201202  | -0.82491133 | 0.81308437  |
| H         | 2.61951313  | -0.40760102 | -0.86296042 | H  | 2.35555631  | -0.28605819 | -0.42065711 |
| O         | -1.44761799 | -2.21126633 | 2.11759119  | O  | 0.14580229  | 1.92394830  | -2.50887271 |
| H         | -1.03877019 | -2.55509329 | 1.28108751  | H  | -0.78124365 | 1.94023194  | -2.19423255 |
| H         | -2.36291441 | -2.03726294 | 1.84539908  | H  | 0.39744472  | 0.98868756  | -2.37773596 |
| O         | -1.65769697 | 3.08545443  | 1.07063485  | O  | 2.46603212  | -2.39851133 | 1.60959267  |
| H         | -1.57727278 | 2.63427106  | 0.20736770  | H  | 1.95345943  | -2.54447111 | 0.77343607  |
| H         | -1.68138941 | 2.33348212  | 1.68675956  | H  | 1.78012420  | -2.26618236 | 2.27764094  |
| O         | -0.85540460 | 0.46382513  | 1.67872399  | O  | -0.35446876 | 0.66031252  | 2.09988383  |
| H         | -1.11445149 | 0.52437998  | 0.73413890  | H  | -1.20684774 | 0.48124358  | 1.62886832  |
| H         | -1.05759290 | -0.45904016 | 1.94433123  | H  | -0.07190344 | -0.24711635 | 2.30916478  |

| 7K |             |             |             | 7L |             |             |             |
|----|-------------|-------------|-------------|----|-------------|-------------|-------------|
| C  | -2.13095704 | 1.44293869  | 0.82641507  | C  | -2.55323376 | -0.26564092 | 0.43713048  |
| H  | -2.75987241 | 1.31516244  | -0.05779551 | H  | -2.86913408 | -0.57845293 | -0.56056294 |
| H  | -2.57762780 | 2.25384997  | 1.41853736  | H  | -3.45010081 | 0.06507746  | 0.97935146  |
| C  | -2.08808655 | 0.16306271  | 1.66902049  | C  | -1.90391827 | -1.43990906 | 1.18916508  |
| H  | -1.68005621 | 0.36173568  | 2.66373190  | H  | -1.77415995 | -1.19765425 | 2.24696013  |
| H  | -3.10768802 | -0.22314106 | 1.80716473  | H  | -2.56086129 | -2.31649852 | 1.11545148  |
| C  | -0.74568238 | 1.92891967  | 0.37185116  | C  | -1.63274675 | 0.95275340  | 0.29891501  |
| O  | 0.25295103  | 1.67180346  | 1.11562117  | O  | -0.83339582 | 1.20722111  | 1.26218167  |
| O  | -0.68624055 | 2.56630120  | -0.71904041 | O  | -1.70569621 | 1.64273503  | -0.75598371 |
| C  | -1.25339894 | -0.95585768 | 1.03856382  | C  | -0.53756760 | -1.81134278 | 0.59873561  |
| O  | -1.21045936 | -1.03159945 | -0.23436512 | O  | -0.45900070 | -1.92748383 | -0.67022741 |
| O  | -0.62745740 | -1.72697241 | 1.81921509  | O  | 0.44406065  | -1.93094032 | 1.38050008  |
| Na | 1.48781578  | -0.39431518 | 0.63990615  | Na | 1.44710049  | 0.30204878  | 1.00908448  |
| O  | -1.94360687 | 0.80819712  | -2.48464101 | O  | -1.46321095 | -0.31159636 | -2.80914142 |
| H  | -1.58424535 | 1.58897367  | -2.00803480 | H  | -1.84340256 | 0.38608823  | -2.24129563 |
| H  | -2.04760826 | 0.15482241  | -1.77041140 | H  | -1.17956849 | -0.99076927 | -2.16279614 |
| O  | 1.54311982  | -2.75952085 | 0.52561526  | O  | 2.28092264  | 2.32336127  | 0.07998715  |
| H  | 1.19621220  | -3.14164529 | -0.30298440 | H  | 2.19384395  | 2.12495040  | -0.86426800 |
| H  | 0.73122913  | -2.64890443 | 1.06999735  | H  | 1.57398803  | 2.98655340  | 0.25754659  |
| O  | 2.62769513  | 0.48106037  | -1.17374973 | O  | -0.01761798 | 3.72737972  | 0.65060864  |
| H  | 1.98727647  | 0.14791781  | -1.83479965 | H  | -0.55118484 | 3.77607247  | -0.15565876 |
| H  | 2.49372577  | 1.45517212  | -1.13732259 | H  | -0.33332959 | 2.87009764  | 1.03390769  |
| O  | 1.99396654  | 3.15785047  | -0.70731794 | O  | 0.62666613  | -0.02341797 | 3.32181693  |
| H  | 1.03481255  | 3.06459108  | -0.92778827 | H  | 0.51776054  | -0.90056483 | 2.89089761  |
| H  | 1.95256271  | 2.97309153  | 0.24406770  | H  | -0.09468409 | 0.49151161  | 2.91531338  |
| O  | 1.20122809  | 0.00033183  | 3.06946305  | O  | 0.61313559  | 1.54080754  | -2.33304236 |
| H  | 0.54782998  | -0.72031124 | 2.98960293  | H  | -0.06538827 | 1.78642937  | -1.66825979 |
| H  | 0.75333678  | 0.75422471  | 2.63214420  | H  | 0.10467915  | 0.90713685  | -2.88084361 |
| O  | -0.24773830 | -3.37903176 | -1.60387408 | O  | 1.56327238  | -3.63868072 | -1.91269486 |
| H  | -0.77196553 | -2.76639330 | -1.04867474 | H  | 0.78592200  | -3.27477176 | -1.44963176 |
| H  | 0.04573113  | -2.80586425 | -2.33032937 | H  | 2.19893441  | -2.91066627 | -1.86942229 |
| O  | 0.42770993  | -0.66948903 | -2.44971214 | O  | 1.93493400  | -0.62168348 | -1.09226310 |
| H  | 0.00240501  | -0.81663618 | -1.57997208 | H  | 1.14981086  | -1.21000859 | -1.00910966 |
| H  | -0.22153337 | -0.06429932 | -2.86272007 | H  | 1.61269622  | 0.11950365  | -1.64312485 |



**Table S10.** The Cartesian atomic coordinates of the typical low-lying isomers of  $\text{Na}^+(\text{DC}_2^{2-})(\text{H}_2\text{O})_8$  using B3LYP exchange-correlation functional with dispersion correction.

| <b>8A</b> |             |             |             | <b>8B</b> |             |             |             |
|-----------|-------------|-------------|-------------|-----------|-------------|-------------|-------------|
| C         | -0.13933706 | -2.51918072 | -1.76123270 | C         | 1.01888564  | 3.33121263  | 0.41757527  |
| H         | 0.28781700  | -1.94036968 | -2.58474716 | H         | 2.07257626  | 3.18850008  | 0.66827854  |
| H         | -0.55113117 | -3.45637318 | -2.14921412 | H         | 0.74068336  | 4.37995051  | 0.58073824  |
| C         | 0.97737896  | -2.86031787 | -0.73770407 | C         | 0.77258478  | 2.96911479  | -1.06955368 |
| H         | 0.58956678  | -3.57063348 | -0.00216476 | H         | -0.26421647 | 3.19868837  | -1.32952957 |
| H         | 1.81980118  | -3.31415139 | -1.27274293 | H         | 1.45420844  | 3.56249971  | -1.68825469 |
| C         | -1.26030421 | -1.72483520 | -1.07349793 | C         | 0.19003041  | 2.45182004  | 1.33726604  |
| O         | -2.13693651 | -2.34349125 | -0.44154140 | O         | -1.11029810 | 2.60136713  | 1.16653205  |
| O         | -1.15425432 | -0.44006473 | -1.14273494 | O         | 0.69689187  | 1.66129158  | 2.13065582  |
| C         | 1.46893966  | -1.60955187 | -0.00801467 | C         | 1.05098227  | 1.47807214  | -1.29869131 |
| O         | 2.12508762  | -0.74454498 | -0.66356833 | O         | 2.24293174  | 1.10485985  | -1.38895081 |
| O         | 1.12346035  | -1.46491587 | 1.20681071  | O         | 0.03251150  | 0.70071420  | -1.31148025 |
| O         | 0.77930857  | 2.64982481  | -0.98696944 | O         | 2.33652485  | -1.46859315 | -0.52109747 |
| H         | 0.79559850  | 2.05605198  | -1.77725901 | H         | 2.38554817  | -0.55517969 | -0.90806032 |
| H         | -0.01730173 | 3.22224950  | -1.06001715 | H         | 2.12987254  | -1.35018588 | 0.42897823  |
| O         | 0.78689471  | 0.57736250  | -2.73451259 | O         | -2.68574727 | 0.54006570  | -1.20380272 |
| H         | 1.48438971  | 0.07394443  | -2.26987406 | H         | -2.62607901 | -0.30524128 | -1.67862378 |
| H         | -0.02777494 | 0.20174728  | -2.31502255 | H         | -1.76076134 | 0.87584991  | -1.24564179 |
| O         | -1.41624999 | -1.90902640 | 2.22392468  | O         | 1.12944408  | -1.09609396 | 1.97813773  |
| H         | -0.48091321 | -1.98071085 | 1.93715242  | H         | 1.14609719  | -0.13650787 | 2.14893820  |
| H         | -1.91372239 | -2.08320286 | 1.39756308  | H         | 0.17805099  | -1.37001629 | 2.15397785  |
| O         | -1.31976699 | 0.78620545  | 2.48689454  | O         | 0.09600880  | -3.79314040 | 0.87952768  |
| H         | -1.44347873 | -0.19862636 | 2.50487464  | H         | -0.57156318 | -3.14426613 | 1.29013328  |
| H         | -0.41184667 | 0.95262275  | 2.81314120  | H         | 0.92584363  | -3.59579024 | 1.33431572  |
| O         | 1.44130581  | 0.81933687  | 2.70578223  | O         | -1.34703888 | -1.86376844 | 1.81468502  |
| H         | 1.48980592  | -0.09320298 | 2.34255030  | H         | -2.06402180 | -0.34201697 | 1.70795919  |
| H         | 2.05518237  | 1.31370243  | 2.11697295  | H         | -1.91216798 | -2.20993655 | 2.51357261  |
| O         | -2.43036341 | 1.55719729  | 0.12010930  | O         | -2.52772992 | 0.52922218  | 1.53751241  |
| H         | -2.17480591 | 0.73801561  | -0.37424581 | H         | -2.81061773 | 0.47125214  | 0.59559313  |
| H         | -2.19265417 | 1.38671815  | 1.05713046  | H         | -1.64025001 | 1.77649999  | 1.49623755  |
| O         | 2.84504677  | 1.65350944  | 0.52694099  | O         | 0.72761422  | -3.30825325 | -1.74643868 |
| H         | 2.75826407  | 0.77065757  | 0.09689462  | H         | 0.43581010  | -3.71233480 | -0.89997637 |
| H         | 2.29478721  | 2.25057444  | -0.01712790 | H         | 1.46128373  | -2.71573175 | -1.46068791 |
| O         | -1.68292134 | 3.84359104  | -0.97565354 | O         | -1.14665714 | -1.49113748 | -2.54313752 |
| H         | -2.15223115 | 3.92767353  | -1.81333087 | H         | -0.57132160 | -0.70325098 | -2.49877724 |
| H         | -2.03909118 | 3.01477165  | -0.54378159 | H         | -0.53335919 | -2.25718173 | -2.45571472 |
| Na        | 0.18686607  | 0.79445123  | 0.44096653  | Na        | -0.19923872 | -1.34200053 | -0.19544089 |

**8C**

|    |             |             |             |
|----|-------------|-------------|-------------|
| C  | -0.97348131 | -2.62295949 | 0.51969128  |
| H  | -1.80480479 | -2.63163554 | -0.18934516 |
| H  | -1.16276307 | -3.41625895 | 1.25612676  |
| C  | 0.35638754  | -2.90291629 | -0.18817355 |
| H  | 1.13229286  | -3.16678974 | 0.53621150  |
| H  | 0.24624360  | -3.77058740 | -0.85242795 |
| C  | -0.99197571 | -1.28625661 | 1.26473428  |
| O  | 0.06564790  | -0.90398563 | 1.85318481  |
| O  | -2.06291278 | -0.60801989 | 1.21345022  |
| C  | 0.91533975  | -1.75268031 | -1.04240295 |
| O  | 0.12248671  | -0.79690478 | -1.38115672 |
| O  | 2.12991954  | -1.80578558 | -1.34411037 |
| O  | 0.37823181  | 1.76263046  | 2.54841047  |
| H  | 0.26451851  | 0.78471300  | 2.53770085  |
| H  | 1.16343194  | 1.90995823  | 1.98675950  |
| O  | -2.17599622 | 2.07880277  | 1.51967406  |
| H  | -1.35032803 | 2.28725813  | 2.00212304  |
| H  | -2.25096585 | 1.09837939  | 1.60483577  |
| O  | 2.80647851  | -1.23754924 | 1.39144729  |
| H  | 1.85732967  | -1.29534545 | 1.63800239  |
| H  | 2.84754493  | -1.62944960 | 0.49909673  |
| Na | -0.21625926 | 1.10803067  | 0.13109909  |
| O  | -2.64209709 | -0.53785914 | -1.50107586 |
| H  | -2.74510608 | -0.65996870 | -0.53424226 |
| H  | -1.69409607 | -0.75887175 | -1.63138216 |
| O  | 1.97274374  | 0.94182921  | -2.31442343 |
| H  | 2.68465209  | 0.29119767  | -2.40322904 |
| H  | 1.20538131  | 0.34418701  | -2.11091339 |
| O  | 2.24123855  | 1.33381404  | 0.52348152  |
| H  | 2.59836647  | 0.46073582  | 0.80443395  |
| H  | 2.29047558  | 1.36089129  | -0.45191547 |
| O  | -2.22858434 | 2.17536334  | -1.25503813 |
| H  | -2.38395937 | 2.29821679  | -0.29421600 |
| H  | -2.50555210 | 1.25348800  | -1.46543015 |
| O  | 0.34938145  | 3.01400923  | -1.27650180 |
| H  | -0.57135689 | 2.84200999  | -1.56774978 |
| H  | 0.94717509  | 2.60265530  | -1.91996569 |

**8D**

|    |             |             |             |
|----|-------------|-------------|-------------|
| C  | -0.27923415 | -2.81168453 | 1.07109138  |
| H  | -1.29041367 | -2.66874477 | 1.46249525  |
| H  | 0.16777655  | -3.69857886 | 1.53288290  |
| C  | -0.34945209 | -3.03701097 | -0.46408083 |
| H  | 0.62917866  | -3.36218725 | -0.82814749 |
| H  | -1.09032178 | -3.81752072 | -0.66855502 |
| C  | 0.57579414  | -1.58334763 | 1.39888491  |
| O  | 1.82715032  | -1.67493751 | 1.34102593  |
| O  | -0.05833123 | -0.49654362 | 1.63556718  |
| C  | -0.76316306 | -1.75602508 | -1.19529420 |
| O  | -1.96374450 | -1.38944013 | -1.17422712 |
| O  | 0.18174436  | -1.08197615 | -1.74717136 |
| Na | -0.02096891 | 0.94104191  | -0.26423061 |
| O  | -2.78102510 | -0.37645817 | 1.29019936  |
| H  | -2.75750919 | -0.81831379 | 0.41794760  |
| H  | -1.85613703 | -0.50288546 | 1.60573410  |
| O  | -1.15442177 | 1.00979193  | -2.69559445 |
| H  | -0.54134203 | 0.23850999  | -2.57607931 |
| H  | -1.98183084 | 0.62663212  | -2.36319371 |
| O  | 2.42083325  | 0.61933825  | -0.05462260 |
| H  | 2.30984310  | -0.01798423 | 0.68936979  |
| H  | 2.75322071  | 0.03338795  | -0.76418068 |
| O  | 0.18311473  | 2.14073248  | 2.43800320  |
| H  | 0.83876072  | 2.59122020  | 1.85753054  |
| H  | 0.33858364  | 1.17760710  | 2.34953862  |
| O  | 1.75257314  | 3.21877188  | 0.43622719  |
| H  | 1.09287979  | 3.37325155  | -0.27126361 |
| H  | 2.23120928  | 2.40411558  | 0.18129346  |
| O  | 2.78863097  | -1.81429311 | -1.39870444 |
| H  | 2.70072595  | -2.07620711 | -0.46477873 |
| H  | 1.85203045  | -1.64694140 | -1.65898165 |
| O  | -1.94334657 | 2.18808965  | 0.75487883  |
| H  | -1.31262110 | 2.27201075  | 1.51145016  |
| H  | -2.45744834 | 1.36456617  | 0.92704763  |
| O  | -0.45363741 | 3.25243145  | -1.28152247 |
| H  | -1.15666988 | 3.09605180  | -0.61487658 |
| H  | -0.67248729 | 2.61360396  | -1.99346601 |

| <b>8E</b> |             |             |             | <b>8F</b> |             |             |             |
|-----------|-------------|-------------|-------------|-----------|-------------|-------------|-------------|
| C         | -0.19765410 | 3.18826943  | -0.20706137 | C         | -1.69078603 | -2.36679785 | -0.47716203 |
| H         | 0.67960201  | 3.35454795  | 0.42469291  | H         | -2.03425305 | -2.05795068 | -1.46904020 |
| H         | -0.71393134 | 4.13893126  | -0.37420919 | H         | -2.41619803 | -3.10563357 | -0.10964293 |
| C         | 0.25999261  | 2.62835465  | -1.58168465 | C         | -0.29570112 | -3.00100930 | -0.55290078 |
| H         | -0.59437784 | 2.60091904  | -2.26394154 | H         | -0.04811081 | -3.51197039 | 0.38128656  |
| H         | 1.03331356  | 3.28835424  | -1.99163414 | H         | -0.28809799 | -3.76071194 | -1.34702156 |
| C         | -1.16170945 | 2.19945513  | 0.46593930  | C         | -1.78291694 | -1.13600620 | 0.43539129  |
| O         | -2.37161963 | 2.24183598  | 0.16847480  | O         | -0.87270711 | -0.97649674 | 1.31589808  |
| O         | -0.61000670 | 1.32591923  | 1.23647865  | O         | -2.72598985 | -0.32669452 | 0.22737615  |
| C         | 0.83304070  | 1.21803960  | -1.44581046 | C         | 0.82831994  | -1.99997223 | -0.86255434 |
| O         | 1.95338847  | 1.07414641  | -0.87412021 | O         | 0.53290451  | -0.99183467 | -1.58555754 |
| O         | 0.10899393  | 0.25026534  | -1.85275057 | O         | 1.96710847  | -2.21445600 | -0.37219043 |
| O         | 1.97838016  | 1.65550131  | 1.90664929  | O         | -0.17070179 | 1.27442162  | 2.58692849  |
| H         | 2.29218616  | 1.63130423  | 0.98382742  | H         | -0.48654849 | 0.38671971  | 2.27761590  |
| H         | 0.99586974  | 1.67199075  | 1.77194920  | H         | 0.78576433  | 1.27076137  | 2.45099628  |
| O         | 0.88957188  | -2.38059377 | -1.81331817 | O         | -2.02047277 | 2.25082968  | 0.78869188  |
| H         | 1.68213618  | -2.24147384 | -1.24623683 | H         | -1.47834832 | 2.17960516  | 1.59694929  |
| H         | 0.59790630  | -1.46543202 | -2.02964233 | H         | -2.42149206 | 1.35500149  | 0.67452503  |
| O         | -2.60567478 | -0.12570985 | -1.25626531 | O         | 1.31293556  | -2.32152269 | 2.37521510  |
| H         | -2.77540496 | 0.66220352  | -0.69509323 | H         | 0.42795658  | -2.00514018 | 2.09225033  |
| H         | -1.74090367 | 0.07709741  | -1.66967489 | H         | 1.69989572  | -2.62803045 | 1.53137136  |
| O         | -1.03211982 | -0.88642332 | 2.74301234  | O         | -1.44601024 | 0.72616148  | -2.10395067 |
| H         | -1.48039533 | -1.47304879 | 2.10044098  | H         | -2.21090129 | 0.51997737  | -1.54153673 |
| H         | -1.12810909 | 0.01055876  | 2.34593713  | H         | -0.91090912 | -0.09556775 | -2.09473622 |
| O         | -1.77793539 | -2.07937598 | 0.38723836  | O         | 1.55408280  | 1.46896398  | -2.18801212 |
| H         | -2.22852544 | -1.43909727 | -0.22501259 | H         | 1.35328398  | 0.50710041  | -2.13545465 |
| H         | -1.64836064 | -2.92101807 | -0.09803700 | H         | 0.70115639  | 1.92575134  | -2.30038874 |
| O         | -0.92217546 | -4.22131903 | -1.14003640 | O         | 2.20964249  | 0.03504505  | 1.17965188  |
| H         | -0.21616143 | -3.59642588 | -1.45915991 | H         | 1.99544268  | -0.61924656 | 1.87967666  |
| H         | -0.46157976 | -4.92921303 | -0.67540308 | H         | 2.37727474  | -0.56478475 | 0.41788449  |
| O         | 1.69113239  | -1.02574345 | 2.40342147  | O         | 2.16136352  | 2.61455306  | 0.23549259  |
| H         | 0.76114897  | -1.08234978 | 2.72643196  | H         | 2.44988705  | 1.84774648  | 0.76227161  |
| H         | 1.91606176  | -0.06414442 | 2.41490221  | H         | 2.16814017  | 2.27614859  | -0.68852366 |
| O         | 2.75761133  | -1.42697357 | -0.11964440 | O         | -0.26104593 | 3.44072261  | -0.99909357 |
| H         | 2.61761618  | -0.49671696 | -0.42617561 | H         | 0.44006208  | 3.56985366  | -0.34015400 |
| H         | 2.55527782  | -1.43382502 | 0.83839425  | H         | -1.05054628 | 3.15827309  | -0.49290269 |
| Na        | 0.23810474  | -0.79063504 | 0.35898391  | Na        | 0.09688386  | 1.01605492  | -0.06556574 |

**8G**

|    |             |             |             |
|----|-------------|-------------|-------------|
| C  | 0.32090568  | -3.03655568 | -0.69389215 |
| H  | 1.23068713  | -3.09657442 | -1.29802195 |
| H  | -0.28307382 | -3.93700543 | -0.85566482 |
| C  | 0.70862497  | -2.96030915 | 0.80852212  |
| H  | -0.19053189 | -3.07424475 | 1.42040127  |
| H  | 1.40303734  | -3.77826978 | 1.02599809  |
| C  | -0.48417259 | -1.81359221 | -1.13637728 |
| O  | -1.67662318 | -1.68719313 | -0.72799379 |
| O  | 0.11963117  | -0.94108888 | -1.84003733 |
| C  | 1.39664010  | -1.61989982 | 1.11596655  |
| O  | 2.61684391  | -1.50443063 | 0.88789184  |
| O  | 0.61692096  | -0.67729042 | 1.51973066  |
| O  | 1.13946039  | 2.23918966  | -1.08957224 |
| H  | 1.82604872  | 1.52796941  | -1.21291242 |
| H  | 0.52985387  | 2.17579241  | -1.86173275 |
| O  | 2.65934971  | 0.05618207  | -1.40962596 |
| H  | 2.87800816  | -0.34921205 | -0.54292167 |
| H  | 1.88883227  | -0.47349451 | -1.70867850 |
| O  | -1.97171052 | -1.32635964 | 2.03681202  |
| H  | -0.99670741 | -1.15568288 | 2.02904098  |
| H  | -2.11084493 | -1.66894106 | 1.13217421  |
| O  | -2.41442539 | 1.32530569  | 1.56519431  |
| H  | -2.41528807 | 0.38855480  | 1.88099077  |
| H  | -1.58182743 | 1.70868339  | 1.91695535  |
| O  | 0.19656930  | 1.91412017  | 2.14376722  |
| H  | 0.67432179  | 1.05732490  | 2.08436725  |
| H  | 0.78449775  | 2.63556857  | 1.83714668  |
| O  | -2.79378022 | 0.81267804  | -1.10781080 |
| H  | -2.54922470 | -0.14292209 | -1.06332597 |
| H  | -2.87170763 | 1.11051200  | -0.17590860 |
| O  | 1.59550267  | 3.97059790  | 0.87789415  |
| H  | 1.02997279  | 4.74640822  | 0.79040360  |
| H  | 1.47942050  | 3.45009799  | 0.04109222  |
| O  | -0.77512988 | 1.46180203  | -2.85538168 |
| H  | -0.49143212 | 0.52955456  | -2.72158953 |
| H  | -1.62956728 | 1.47816680  | -2.37528269 |
| Na | -0.46802058 | 0.74173363  | -0.05530241 |

**8H**

|    |             |             |             |
|----|-------------|-------------|-------------|
| C  | 0.04451459  | 3.04113093  | 0.97507364  |
| H  | 0.95378820  | 2.81634126  | 1.54201296  |
| H  | -0.42140951 | 3.94708747  | 1.37732305  |
| C  | 0.41381068  | 3.29347480  | -0.50999646 |
| H  | -0.49656721 | 3.53062061  | -1.06856151 |
| H  | 1.11393022  | 4.13413507  | -0.56462340 |
| C  | -0.95828057 | 1.88423557  | 1.07828156  |
| O  | -2.14548884 | 2.09905717  | 0.76455656  |
| O  | -0.47616902 | 0.73783159  | 1.41833189  |
| C  | 1.08651047  | 2.05655807  | -1.10287272 |
| O  | 2.29256466  | 1.83134710  | -0.83556266 |
| O  | 0.34590174  | 1.26305531  | -1.79454575 |
| O  | 1.39892618  | -2.60584769 | 0.78143113  |
| H  | 1.86411186  | -1.78601866 | 1.05553168  |
| H  | 0.86208802  | -2.91237379 | 1.55055218  |
| O  | 2.10223599  | 0.00407886  | 1.25266728  |
| H  | 2.42552653  | 0.63239337  | 0.57538867  |
| H  | 1.23213267  | 0.38404489  | 1.53341522  |
| O  | -2.34349204 | 0.76706588  | -1.68372247 |
| H  | -1.43512569 | 1.09644154  | -1.86489849 |
| H  | -2.55376093 | 1.17836551  | -0.81830656 |
| O  | -1.98220709 | -1.79572557 | -0.95756487 |
| H  | -2.19507435 | -0.92116183 | -1.37543364 |
| H  | -1.30544818 | -2.26831819 | -1.48385764 |
| O  | 0.43193116  | -2.89409205 | -1.78759906 |
| H  | 0.81387075  | -3.03682603 | -0.89520383 |
| H  | 1.06174126  | -2.26679699 | -2.20210498 |
| O  | -2.00097192 | -1.49362034 | 1.78268464  |
| H  | -1.58915334 | -0.59512178 | 1.77573163  |
| H  | -2.13170544 | -1.69942842 | 0.83200264  |
| O  | 1.97156088  | -0.72141137 | -2.42243549 |
| H  | 1.35403765  | 0.05913324  | -2.38583297 |
| H  | 2.74311090  | -0.38614504 | -1.94488602 |
| O  | -0.33056135 | -3.26341643 | 2.78046048  |
| H  | -0.75595449 | -4.12622227 | 2.71979517  |
| H  | -1.01330239 | -2.59439685 | 2.46800984  |
| Na | 0.17465858  | -0.72397947 | -0.34819483 |

| <b>8I</b> |             |             | <b>8J</b>   |    |             |             |             |
|-----------|-------------|-------------|-------------|----|-------------|-------------|-------------|
| C         | -2.15924775 | -2.07094433 | 0.04865084  | C  | -1.34935412 | 1.35867077  | 2.25979970  |
| H         | -2.35715132 | -2.17303883 | -1.02236506 | H  | -1.89986053 | 2.18214654  | 1.79766952  |
| H         | -3.06556014 | -2.40627826 | 0.57264850  | H  | -1.31610708 | 1.56154132  | 3.33928681  |
| C         | -0.97331206 | -2.94039125 | 0.46571171  | C  | -2.06164453 | 0.02655116  | 2.01191250  |
| H         | -0.84000856 | -2.92299231 | 1.55111666  | H  | -1.63444749 | -0.76749736 | 2.62974593  |
| H         | -1.17516724 | -3.98556975 | 0.19188400  | H  | -3.11927925 | 0.12260223  | 2.29495998  |
| C         | -2.00196978 | -0.57470806 | 0.33912968  | C  | 0.09550205  | 1.41197511  | 1.74570525  |
| O         | -1.18530967 | -0.20427660 | 1.24735518  | O  | 0.74751681  | 0.32082859  | 1.64473393  |
| O         | -2.67799016 | 0.21577523  | -0.37765844 | O  | 0.55809787  | 2.54614562  | 1.45058528  |
| C         | 0.37440151  | -2.57434774 | -0.17561517 | C  | -2.02471804 | -0.43491192 | 0.55078361  |
| O         | 0.36126819  | -1.93584914 | -1.28968429 | O  | -2.05868390 | 0.44759151  | -0.36174523 |
| O         | 1.41888468  | -2.92866603 | 0.41847026  | O  | -1.96442350 | -1.68432986 | 0.34718952  |
| O         | -0.84370050 | 2.53300304  | 2.07545735  | Na | 1.33682058  | -1.14893823 | -0.36917885 |
| H         | -0.97364469 | 1.56767745  | 1.97166046  | O  | -1.30229471 | 3.19241250  | -0.61751604 |
| H         | 0.05887520  | 2.74710774  | 1.77248621  | H  | -0.79357897 | 3.29409231  | 0.20866474  |
| O         | -1.83769250 | 2.81909200  | -0.51744607 | H  | -1.63374520 | 2.27310887  | -0.54979816 |
| H         | -1.66727619 | 3.03733627  | 0.41968597  | O  | -0.37538929 | -2.46902463 | -1.63792105 |
| H         | -2.33903789 | 1.97444868  | -0.45579101 | H  | -0.59110522 | -1.92605068 | -2.41217764 |
| O         | 0.99496577  | -1.26351371 | 2.62985557  | H  | -1.09362496 | -2.25433216 | -0.98790773 |
| H         | 0.11551800  | -1.00341817 | 2.27805486  | O  | 3.14080550  | 0.34220864  | 0.35108608  |
| H         | 1.23522034  | -2.04652316 | 2.09248151  | H  | 3.12032871  | 1.03765824  | -0.31996750 |
| O         | -0.73575121 | 0.23091596  | -2.43241351 | H  | 2.40500594  | 0.55909939  | 0.96942864  |
| H         | -1.62940773 | 0.35270326  | -2.06596028 | O  | 0.33488565  | -2.36857343 | 1.73368931  |
| H         | -0.45072898 | -0.65422218 | -2.09935122 | H  | -0.57144144 | -2.36251125 | 1.35870109  |
| O         | 2.67243020  | -0.77552225 | -1.56653135 | H  | 0.48471975  | -1.42262313 | 1.95536201  |
| H         | 3.38572288  | -1.41629041 | -1.46543708 | O  | 1.53912357  | 2.74404936  | -1.07539064 |
| H         | 1.81646392  | -1.31777025 | -1.52348876 | H  | 1.41898350  | 2.65634907  | -0.09975854 |
| O         | 2.10210807  | 0.46904027  | 0.83343855  | H  | 0.65261319  | 3.05327636  | -1.34034442 |
| H         | 1.82780230  | -0.14009738 | 1.56216187  | O  | -1.42615071 | -0.13331370 | -2.84611369 |
| H         | 2.42616838  | -0.07269801 | 0.08282345  | H  | -1.75214888 | 0.05314297  | -1.91188769 |
| O         | 1.59853638  | 3.07549428  | 0.64297947  | H  | -1.94073166 | 0.42199128  | -3.44153306 |
| H         | 2.02513814  | 2.19774717  | 0.78217645  | O  | 1.27071699  | 0.24026582  | -2.22738570 |
| H         | 1.60778250  | 3.18847320  | -0.32072261 | H  | 0.35648693  | 0.22071573  | -2.57224981 |
| O         | 1.56305159  | 1.78692758  | -2.09761110 | H  | 1.40993628  | 1.14727202  | -1.87574549 |
| H         | 2.16107565  | 1.01788220  | -2.03605420 | O  | 1.85414894  | -3.57384014 | -0.30560272 |
| H         | 0.76165551  | 1.42591127  | -2.52652523 | H  | 1.11701234  | -3.51649641 | -0.94064702 |
| Na        | 0.01268571  | 1.27189614  | -0.25128220 | H  | 1.42616128  | -3.39513062 | 0.55498235  |

| 8K |             |             |             | 8L |             |             |             |
|----|-------------|-------------|-------------|----|-------------|-------------|-------------|
| C  | -0.96585696 | 2.36077979  | 1.35221831  | C  | -1.69078603 | -2.36679785 | -0.47716203 |
| H  | -1.12120710 | 3.08795713  | 0.55101415  | H  | -2.03425305 | -2.05795068 | -1.46904020 |
| H  | -0.92962753 | 2.92520990  | 2.29410166  | H  | -2.41619803 | -3.10563357 | -0.10964293 |
| C  | -2.12064071 | 1.35450490  | 1.39790512  | C  | -0.29570112 | -3.00100930 | -0.55290078 |
| H  | -2.10410288 | 0.77976465  | 2.32676416  | H  | -0.04811081 | -3.51197039 | 0.38128656  |
| H  | -3.07400449 | 1.89949480  | 1.36376742  | H  | -0.28809799 | -3.76071194 | -1.34702156 |
| C  | 0.41711559  | 1.72907818  | 1.14490832  | C  | -1.78291694 | -1.13600620 | 0.43539129  |
| O  | 0.60039380  | 0.52094396  | 1.50764486  | O  | -0.87270711 | -0.97649674 | 1.31589808  |
| O  | 1.29858258  | 2.45656789  | 0.61139262  | O  | -2.72598985 | -0.32669452 | 0.22737615  |
| C  | -2.10787000 | 0.37547599  | 0.22000918  | C  | 0.82831994  | -1.99997223 | -0.86255434 |
| O  | -1.83158288 | 0.83198873  | -0.93223871 | O  | 0.53290451  | -0.99183467 | -1.58555754 |
| O  | -2.36954668 | -0.83797817 | 0.47283785  | O  | 1.96710847  | -2.21445600 | -0.37219043 |
| Na | 0.11509220  | -1.70721290 | 0.44247550  | O  | -0.17070179 | 1.27442162  | 2.58692849  |
| O  | -0.01649071 | 2.81658991  | -1.91724368 | H  | -0.48654849 | 0.38671971  | 2.27761590  |
| H  | 0.43401198  | 3.05183687  | -1.08536406 | H  | 0.78576433  | 1.27076137  | 2.45099628  |
| H  | -0.69463487 | 2.17635304  | -1.61941125 | O  | -2.02047277 | 2.25082968  | 0.78869188  |
| O  | -1.46759154 | -2.90420636 | -1.01313802 | H  | -1.47834832 | 2.17960516  | 1.59694929  |
| H  | -1.33932224 | -2.55881284 | -1.91005745 | H  | -2.42149206 | 1.35500149  | 0.67452503  |
| H  | -2.03437729 | -2.22085650 | -0.58852511 | O  | 1.31293556  | -2.32152269 | 2.37521510  |
| O  | 2.25018529  | -2.86834537 | 0.37490495  | H  | 0.42795658  | -2.00514018 | 2.09225033  |
| H  | 2.10548523  | -2.64298087 | -0.56012742 | H  | 1.69989572  | -2.62803045 | 1.53137136  |
| H  | 2.72061766  | -2.07613903 | 0.71888792  | O  | -1.44601024 | 0.72616148  | -2.10395067 |
| O  | 3.18001670  | -0.35885171 | 1.10335321  | H  | -2.21090129 | 0.51997737  | -1.54153673 |
| H  | 3.45795856  | 0.07640441  | 0.28609525  | H  | -0.91090912 | -0.09556775 | -2.09473622 |
| H  | 2.30418032  | 0.04757722  | 1.31725727  | O  | 1.55408280  | 1.46896398  | -2.18801212 |
| O  | -0.87498120 | -1.53095030 | 2.71360017  | H  | 1.35328398  | 0.50710041  | -2.13545465 |
| H  | -1.65195630 | -1.38825030 | 2.13642246  | H  | 0.70115639  | 1.92575134  | -2.30038874 |
| H  | -0.37002568 | -0.70175822 | 2.59999218  | O  | 2.20964249  | 0.03504505  | 1.17965188  |
| O  | 2.47639790  | 1.28564408  | -1.49356753 | H  | 1.99544268  | -0.61924656 | 1.87967666  |
| H  | 2.20257819  | 1.67822802  | -0.62570353 | H  | 2.37727474  | -0.56478475 | 0.41788449  |
| H  | 1.86721214  | 1.73565835  | -2.10483320 | O  | 2.16136352  | 2.61455306  | 0.23549259  |
| O  | -1.19484757 | -0.76918045 | -2.91767481 | H  | 2.44988705  | 1.84774648  | 0.76227161  |
| H  | -1.52730270 | -0.17413190 | -2.17666808 | H  | 2.16814017  | 2.27614859  | -0.68852366 |
| H  | -1.27463726 | -0.26568856 | -3.73529103 | O  | -0.26104593 | 3.44072261  | -0.99909357 |
| O  | 1.23085965  | -1.17280500 | -1.63430333 | H  | 0.44006208  | 3.56985366  | -0.34015400 |
| H  | 0.47421029  | -1.02631830 | -2.23739706 | H  | -1.05054628 | 3.15827309  | -0.49290269 |
| H  | 1.72153584  | -0.32016594 | -1.58253483 | Na | 0.09688386  | 1.01605492  | -0.06556574 |

**8M**

|    |             |             |             |
|----|-------------|-------------|-------------|
| C  | -2.48667381 | 1.17959654  | 0.74529591  |
| H  | -2.97422208 | 1.05515030  | -0.22380619 |
| H  | -3.09654866 | 1.88031947  | 1.33300623  |
| C  | -2.41144465 | -0.15824616 | 1.48746285  |
| H  | -1.99255586 | -0.01873351 | 2.48770127  |
| H  | -3.42643439 | -0.56131038 | 1.61123040  |
| C  | -1.12519401 | 1.85570176  | 0.53878906  |
| O  | -0.25884757 | 1.75216110  | 1.46047508  |
| O  | -0.94898407 | 2.51059907  | -0.53318887 |
| C  | -1.58927651 | -1.23972444 | 0.77294324  |
| O  | -1.56561124 | -1.24321427 | -0.50216033 |
| O  | -0.98403334 | -2.07015620 | 1.50842941  |
| Na | 1.93863792  | -0.92101563 | 0.52130354  |
| O  | -1.92488442 | 0.88896227  | -2.59483747 |
| H  | -1.78350738 | 1.59824023  | -1.93346161 |
| H  | -1.94298336 | 0.08536786  | -2.04386706 |
| O  | 1.33058179  | -3.19717518 | 0.61693077  |
| H  | 1.06401235  | -3.51194109 | -0.26799901 |
| H  | 0.45900386  | -2.94124516 | 1.00357756  |
| O  | 3.11842500  | 0.95217644  | -0.32318717 |
| H  | 2.79661761  | 1.02124409  | -1.23369371 |
| H  | 2.79385178  | 1.78949906  | 0.09473990  |
| O  | 1.89879092  | 3.15325765  | 0.71996043  |
| H  | 1.52150613  | 3.65329567  | -0.01598938 |
| H  | 1.10577435  | 2.66848803  | 1.08329404  |
| O  | 0.98581220  | -0.41000916 | 2.58520978  |
| H  | 0.29185061  | -1.09608190 | 2.53270772  |
| H  | 0.50808756  | 0.41197433  | 2.33744579  |
| O  | 0.88560580  | 1.77854140  | -2.39496910 |
| H  | 0.39217623  | 2.14626010  | -1.62111254 |
| H  | 0.15873093  | 1.55805725  | -3.00355342 |
| O  | -0.15977809 | -3.48581291 | -1.81414487 |
| H  | -0.82550743 | -2.96723463 | -1.31896416 |
| H  | 0.36705695  | -2.78692925 | -2.23537111 |
| O  | 0.90563743  | -0.86133686 | -1.56476168 |
| H  | -0.01149188 | -0.95407018 | -1.21724438 |
| H  | 0.95924089  | 0.05922952  | -1.89936513 |

**8N**

|    |             |             |             |
|----|-------------|-------------|-------------|
| C  | -2.72953019 | 1.38822689  | -0.09025278 |
| H  | -2.86984523 | 0.98279506  | -1.09657577 |
| H  | -3.50024598 | 2.13858078  | 0.11355579  |
| C  | -2.86903630 | 0.24308538  | 0.94521590  |
| H  | -2.82146498 | 0.65597099  | 1.95627796  |
| H  | -3.83844240 | -0.24699557 | 0.79334183  |
| C  | -1.35053506 | 2.04835105  | 0.02136368  |
| O  | -1.18226047 | 2.94199292  | 0.87892105  |
| O  | -0.43611041 | 1.58390007  | -0.75526230 |
| C  | -1.76215714 | -0.79961750 | 0.78599138  |
| O  | -1.73868211 | -1.48476928 | -0.29276421 |
| O  | -0.89252602 | -0.88834907 | 1.69524829  |
| Na | 0.76762268  | -0.38677529 | -0.14772284 |
| O  | -1.06960276 | -0.23063747 | -2.67013753 |
| H  | -1.49087928 | -0.83426241 | -2.02578723 |
| H  | -0.92311858 | 0.57063863  | -2.11155624 |
| O  | -0.50568478 | -3.84338771 | 0.01659125  |
| H  | -1.01355231 | -2.99481122 | -0.11327989 |
| H  | -0.44818254 | -3.94052753 | 0.97571616  |
| O  | 1.36880665  | 3.23550248  | 1.65401964  |
| H  | 0.41142184  | 3.16009610  | 1.37946211  |
| H  | 1.80033721  | 3.67845384  | 0.91259851  |
| O  | 2.19706073  | 1.64230835  | -1.42276126 |
| H  | 2.58066951  | 1.36778079  | -0.56617493 |
| H  | 1.27179276  | 1.88634250  | -1.18873138 |
| O  | 2.46460271  | 0.79143982  | 1.17624287  |
| H  | 2.32275918  | 0.01156663  | 1.75785914  |
| H  | 2.04156281  | 1.59414155  | 1.56396345  |
| O  | 1.71588647  | -1.65522486 | 2.11880655  |
| H  | 1.94484929  | -2.10940345 | 1.28160535  |
| H  | 0.74251251  | -1.53041711 | 2.08347178  |
| O  | 1.59489051  | -0.82282526 | -2.51075347 |
| H  | 1.94386493  | 0.07813626  | -2.32198612 |
| H  | 0.64768696  | -0.69353332 | -2.76050761 |
| O  | 1.89397842  | -2.62807225 | -0.47438703 |
| H  | 1.91367159  | -2.14979294 | -1.33267604 |
| H  | 1.08909751  | -3.19564296 | -0.46240690 |

**Table S11.** The Cartesian atomic coordinates of the typical low-lying isomers of Na<sup>+</sup>(DC<sub>2</sub><sup>2-</sup>)(H<sub>2</sub>O)<sub>9</sub> using B3LYP exchange-correlation functional with dispersion correction.

| <b>9A</b> |             |             |             | <b>9B</b> |             |             |             |
|-----------|-------------|-------------|-------------|-----------|-------------|-------------|-------------|
| C         | -1.74047704 | 2.38119149  | -0.80064075 | C         | -0.84795936 | -2.92249915 | 1.27442958  |
| H         | -2.65329438 | 1.81238909  | -0.99922425 | H         | -1.77093678 | -2.55033819 | 1.72777842  |
| H         | -1.81886096 | 3.36628281  | -1.27219635 | H         | -0.59243227 | -3.89056105 | 1.71832728  |
| C         | -1.58203852 | 2.58351628  | 0.73607752  | C         | -1.06715069 | -3.12323651 | -0.25066211 |
| H         | -0.84942640 | 3.37241821  | 0.91953054  | H         | -0.23152400 | -3.69462571 | -0.66473140 |
| H         | -2.55382198 | 2.87547768  | 1.14779360  | H         | -1.99689370 | -3.68355760 | -0.39803403 |
| C         | -0.54315476 | 1.63515140  | -1.39769413 | C         | 0.29117879  | -1.93117367 | 1.53084130  |
| O         | 0.51624234  | 2.26082278  | -1.63547128 | O         | 1.47924319  | -2.32908377 | 1.42717855  |
| O         | -0.68760446 | 0.36718972  | -1.56291268 | O         | -0.04854519 | -0.71858784 | 1.75573731  |
| C         | -1.10991309 | 1.29383684  | 1.41082206  | C         | -1.17394609 | -1.78405034 | -0.98771823 |
| O         | -1.97753899 | 0.41196254  | 1.69663121  | O         | -2.23271667 | -1.11392939 | -0.91316667 |
| O         | 0.14038448  | 1.14498194  | 1.57392222  | O         | -0.12086293 | -1.39075770 | -1.61036929 |
| Na        | 0.72294943  | -0.70618353 | 0.12770535  | Na        | 0.30801972  | 0.69194282  | -0.22684285 |
| O         | -2.00451800 | -3.20196224 | -0.30751732 | O         | -2.71814086 | -0.07164359 | 1.61208419  |
| H         | -2.44006408 | -2.30737921 | -0.48910464 | H         | -2.82413367 | -0.50115078 | 0.73797085  |
| H         | -2.65120398 | -3.89097436 | -0.49264086 | H         | -1.80616485 | -0.35480521 | 1.85900433  |
| O         | -2.90966630 | -0.78291275 | -0.63264431 | O         | -0.87280978 | 0.94618793  | -2.59271876 |
| H         | -2.84725959 | -0.36521898 | 0.25383994  | H         | -0.51832031 | 0.02626765  | -2.46329055 |
| H         | -2.15255440 | -0.34802950 | -1.11212205 | H         | -1.71843340 | 0.87552323  | -2.12230028 |
| O         | 1.58438804  | 3.49069097  | 0.72497097  | O         | 2.57101059  | -0.30789350 | -0.05088635 |
| H         | 1.19702226  | 2.71268070  | 1.16967249  | H         | 2.32306868  | -0.89542611 | 0.70268401  |
| H         | 1.31066367  | 3.34663298  | -0.19774504 | H         | 2.71516764  | -0.95892987 | -0.76591142 |
| O         | 2.53461141  | 0.42836322  | -1.12414567 | O         | 0.77875683  | 1.85339990  | 2.18209572  |
| H         | 1.95928015  | 1.20001814  | -1.32945621 | H         | 1.57857065  | 2.10111365  | 1.65856048  |
| H         | 2.84672516  | 0.51755222  | -0.20022291 | H         | 0.74857016  | 0.87539716  | 2.24266689  |
| O         | 1.92734091  | -2.57127093 | 1.58422577  | O         | 2.76050510  | 2.37505202  | 0.36806909  |
| H         | 1.01521364  | -2.43999876 | 1.92537549  | H         | 2.20361617  | 2.64879634  | -0.38980120 |
| H         | 1.76635556  | -2.90813834 | 0.68065031  | H         | 2.98368407  | 1.44064116  | 0.17865099  |
| O         | 1.15063431  | -1.17945839 | -2.90845546 | O         | 2.22065298  | -2.77581107 | -1.34936739 |
| H         | 0.43545721  | -0.56289485 | -2.62487263 | H         | 2.11251360  | -2.97435382 | -0.40188652 |
| H         | 1.93473616  | -0.75872576 | -2.50649726 | H         | 1.35279015  | -2.36726891 | -1.57815710 |
| O         | 2.76351796  | 0.06100986  | 1.62172295  | O         | -1.44953535 | 2.16658515  | 0.71584960  |
| H         | 2.62479508  | -0.90602567 | 1.72701700  | H         | -0.71327160 | 2.20711800  | 1.37796819  |
| H         | 1.95709406  | 0.48816540  | 1.95885319  | H         | -2.09196309 | 1.50197011  | 1.06539211  |
| O         | 0.73206818  | -2.94431146 | -0.91470490 | O         | -1.32632178 | 4.42719516  | -0.67714701 |
| H         | 0.87227589  | -2.46239937 | -1.76882628 | H         | -1.55019914 | 3.64789519  | -0.10488806 |
| H         | -0.21739885 | -3.16353794 | -0.84343907 | H         | -1.99756932 | 4.45422077  | -1.36871561 |
| O         | -0.69357804 | -1.93360329 | 1.84696983  | O         | 0.80779793  | 2.83841739  | -1.56523552 |
| H         | -1.18952983 | -1.07735230 | 1.95596588  | H         | 0.18356351  | 3.53549939  | -1.27131909 |
| H         | -1.24634607 | -2.52102584 | 1.30217087  | H         | 0.25451375  | 2.23576424  | -2.11091362 |



**9C**

|    |             |             |             |
|----|-------------|-------------|-------------|
| C  | 2.22805359  | 2.32150048  | 0.00541109  |
| H  | 2.49801898  | 2.59440628  | -1.01741369 |
| H  | 3.08275207  | 2.54796070  | 0.65799502  |
| C  | 1.00665462  | 3.15036195  | 0.46481841  |
| H  | 0.83763972  | 3.02452689  | 1.53596384  |
| H  | 1.21733545  | 4.20721277  | 0.26201972  |
| C  | 2.00687167  | 0.80409005  | 0.04782371  |
| O  | 1.38176008  | 0.31289606  | 1.03819071  |
| O  | 2.43745950  | 0.13059018  | -0.93710570 |
| C  | -0.24079056 | 2.73901775  | -0.33296829 |
| O  | -0.21038260 | 2.90505675  | -1.57805993 |
| O  | -1.19032531 | 2.16892699  | 0.30791402  |
| Na | -0.73281792 | -0.31149726 | 0.04574206  |
| O  | 2.04480967  | -2.39966800 | -1.43953118 |
| H  | 2.53435602  | -2.52551902 | -2.26006401 |
| H  | 2.24322789  | -1.45756548 | -1.13820282 |
| O  | -3.16788746 | 0.29673827  | -0.05089248 |
| H  | -3.12703444 | -0.13019178 | -0.93672808 |
| H  | -2.67486457 | 1.14417399  | -0.11175388 |
| O  | 0.91250631  | -4.21034417 | 0.61812086  |
| H  | 1.56196939  | -3.85015563 | -0.00890350 |
| H  | 0.87817353  | -3.52950085 | 1.33380716  |
| O  | 0.64045724  | -2.07440718 | 2.28129541  |
| H  | -0.30859890 | -1.84105847 | 2.30021129  |
| H  | 1.07663934  | -1.31189108 | 1.84807523  |
| O  | -1.91503298 | -0.88823852 | 2.16293109  |
| H  | -1.57351295 | -0.06107849 | 2.58204831  |
| H  | -2.59569807 | -0.59867109 | 1.52100443  |
| O  | -0.58534197 | 1.39650428  | 2.81774448  |
| H  | -0.90232025 | 1.84494824  | 1.99321785  |
| H  | 0.28264339  | 1.06302151  | 2.52376981  |
| O  | -0.65725419 | -2.51500680 | -0.90849718 |
| H  | -0.45239002 | -3.24976417 | -0.29086995 |
| H  | 0.19954445  | -2.41711839 | -1.37486246 |
| O  | -0.13959997 | 0.33245687  | -2.27488703 |
| H  | 0.82045128  | 0.19834824  | -2.19773742 |
| H  | -0.26354410 | 1.31485164  | -2.20489819 |
| O  | -2.53421227 | -1.09271859 | -2.36235020 |
| H  | -1.75802225 | -0.56321535 | -2.62988211 |
| H  | -2.10911643 | -1.84984521 | -1.91365494 |

**9D**

|    |             |             |             |
|----|-------------|-------------|-------------|
| C  | -1.68950930 | 2.55966886  | -1.09481852 |
| H  | -1.71543423 | 2.06607319  | -2.07084752 |
| H  | -2.04006578 | 3.59172607  | -1.19684167 |
| C  | -2.63274820 | 1.81088150  | -0.12272229 |
| H  | -2.66836741 | 2.33499458  | 0.83604510  |
| H  | -3.63881030 | 1.79192055  | -0.56092455 |
| C  | -0.25522995 | 2.57680124  | -0.55446680 |
| O  | 0.08036722  | 3.48383283  | 0.23540248  |
| O  | 0.50009216  | 1.60216543  | -0.92798475 |
| C  | -2.19284049 | 0.36673364  | 0.12289380  |
| O  | -2.12124482 | -0.41967119 | -0.88363138 |
| O  | -1.88596776 | 0.02217151  | 1.29720542  |
| Na | 0.33578486  | -0.61108505 | 0.14064735  |
| O  | -0.27754896 | -0.03451904 | -2.91678552 |
| H  | -1.09205352 | -0.29440845 | -2.44030899 |
| H  | 0.02588426  | 0.71890717  | -2.35110074 |
| O  | -2.56274457 | -2.80012053 | 0.34415523  |
| H  | -2.43531738 | -2.01659388 | -0.25151917 |
| H  | -2.76002427 | -2.36445555 | 1.18631068  |
| O  | 2.30093523  | 2.82875803  | 1.62399836  |
| H  | 1.50060672  | 3.13558535  | 1.11639868  |
| H  | 2.96768636  | 2.65857061  | 0.94390417  |
| O  | 3.01599138  | 0.70673319  | -0.61151697 |
| H  | 2.94649174  | 0.33417291  | 0.28639425  |
| H  | 2.17407063  | 1.22171990  | -0.70388770 |
| O  | 1.84614963  | 0.14255397  | 1.85275847  |
| H  | 1.26189664  | -0.26806246 | 2.52835812  |
| H  | 1.87879863  | 1.11826491  | 1.98990620  |
| O  | -0.14768346 | -1.26056211 | 3.09567435  |
| H  | 0.02178319  | -2.03375775 | 2.52103338  |
| H  | -0.85904292 | -0.78055327 | 2.62797252  |
| O  | 1.72337772  | -1.43664220 | -1.75322971 |
| H  | 2.36364307  | -0.72501051 | -1.51931254 |
| H  | 1.03828475  | -1.03418299 | -2.34463148 |
| O  | 1.82140274  | -3.99621575 | -0.99622020 |
| H  | 1.87287448  | -3.07949243 | -1.37229584 |
| H  | 1.44909664  | -4.54901972 | -1.69254807 |
| O  | 0.10621968  | -2.90210358 | 0.87863775  |
| H  | 0.68548363  | -3.45921165 | 0.31658077  |
| H  | -0.83200110 | -3.07461750 | 0.63131789  |

| 9E |             |             |             | 9F |             |             |             |
|----|-------------|-------------|-------------|----|-------------|-------------|-------------|
| C  | -2.05272979 | -2.23644365 | 0.73835701  | C  | -1.07689501 | 2.06716846  | 1.74666576  |
| H  | -2.92327214 | -1.88404367 | 0.17918031  | H  | -0.92193559 | 3.04859210  | 1.29476160  |
| H  | -2.41728281 | -2.88512759 | 1.54702654  | H  | -1.19609617 | 2.23078988  | 2.82680686  |
| C  | -1.09591664 | -3.02928758 | -0.16694152 | C  | -2.35350368 | 1.41376735  | 1.19655520  |
| H  | -0.37225620 | -3.59624624 | 0.42507428  | H  | -2.72864630 | 0.64963001  | 1.87952423  |
| H  | -1.66517745 | -3.75764925 | -0.76053855 | H  | -3.13231155 | 2.18377617  | 1.10986374  |
| C  | -1.38022863 | -1.01886899 | 1.37940059  | C  | 0.20978574  | 1.25016292  | 1.56575578  |
| O  | -0.15105396 | -1.12797126 | 1.70455122  | O  | 0.13421147  | -0.02625519 | 1.60749305  |
| O  | -2.05759968 | 0.03876402  | 1.51698087  | O  | 1.28172418  | 1.89740333  | 1.41791042  |
| C  | -0.32043884 | -2.13103176 | -1.14356786 | C  | -2.17856704 | 0.78153498  | -0.18789554 |
| O  | -0.83135194 | -1.01376440 | -1.45445445 | O  | -1.46781573 | 1.40020154  | -1.04296665 |
| O  | 0.80797686  | -2.52820858 | -1.55815026 | O  | -2.75179350 | -0.32740639 | -0.39358098 |
| O  | 1.49432069  | 0.88536898  | 2.49560145  | Na | 0.58128730  | -1.67761219 | -0.12640275 |
| H  | 0.88649048  | 0.11102485  | 2.43908429  | O  | 0.38746206  | 3.51159328  | -0.86883771 |
| H  | 2.16919778  | 0.69268503  | 1.81903670  | H  | 0.72246171  | 3.35695916  | 0.03160457  |
| O  | -0.65250053 | 2.34164971  | 1.63082341  | H  | -0.31753262 | 2.83227979  | -0.95654021 |
| H  | 0.20231014  | 2.09810074  | 2.04642923  | O  | -1.23152924 | -2.06448145 | -1.73802669 |
| H  | -1.23631087 | 1.54942117  | 1.74028891  | H  | -0.99698186 | -1.62451610 | -2.57064292 |
| O  | 2.08214956  | -2.62702357 | 0.92898685  | H  | -1.89893154 | -1.45014891 | -1.33526610 |
| H  | 1.26299055  | -2.26580093 | 1.33108130  | O  | 2.92719765  | -2.32116178 | -0.12584325 |
| H  | 1.79395606  | -2.84941127 | 0.01797148  | H  | 2.88511626  | -1.77350622 | -0.92755247 |
| Na | 0.39185991  | 0.68688387  | 0.00139230  | H  | 3.11194606  | -1.70410019 | 0.61434234  |
| O  | -2.89528034 | 0.63584198  | -1.16914205 | O  | 2.83279041  | -0.56821836 | 2.03151551  |
| H  | -2.88925116 | 0.64015354  | -0.19411092 | H  | 3.06155073  | 0.36187262  | 1.89131920  |
| H  | -2.33521020 | -0.15308612 | -1.35688972 | H  | 1.85032196  | -0.51901550 | 2.02003636  |
| O  | 1.73731961  | 0.02410892  | -2.26172153 | O  | -2.04254981 | -1.75600540 | 1.90301667  |
| H  | 1.43272655  | -0.91540615 | -2.24979912 | H  | -2.54380681 | -1.37933785 | 1.14942096  |
| H  | 0.91908460  | 0.53986330  | -2.39081850 | H  | -1.30085385 | -1.11943938 | 1.99466936  |
| O  | 2.87902606  | -0.10820437 | 0.23057443  | O  | 2.68549886  | 1.83861609  | -0.95729224 |
| H  | 2.78188052  | -1.04798911 | 0.52598850  | H  | 2.36236551  | 1.73527426  | -0.03589512 |
| H  | 2.60940829  | -0.10140374 | -0.71601024 | H  | 2.05903393  | 2.50398066  | -1.30284522 |
| O  | -0.44854609 | 1.92949126  | -1.92140565 | O  | -0.62800414 | 0.22272080  | -3.23880670 |
| H  | -0.54243872 | 2.81965071  | -1.51317998 | H  | -1.02450746 | 0.68082659  | -2.43237422 |
| H  | -1.33985701 | 1.53088915  | -1.82765128 | H  | -0.69872500 | 0.83610415  | -3.97799634 |
| O  | 2.04752680  | 2.54542907  | -0.35909839 | O  | 1.71387312  | -0.49981021 | -1.91744179 |
| H  | 1.91849399  | 2.41715181  | -1.30901608 | H  | 0.98508182  | -0.26001337 | -2.52461328 |
| H  | 2.76238991  | 1.93899294  | -0.11331836 | H  | 2.11564610  | 0.35806634  | -1.63268994 |
| O  | -0.94284129 | 4.13708298  | -0.35249104 | O  | -0.62805206 | -3.67563745 | 0.53146443  |
| H  | -1.89704191 | 4.27788415  | -0.37415171 | H  | -1.00020272 | -3.55712109 | -0.35775095 |
| H  | -0.78748693 | 3.55677360  | 0.43684926  | H  | -1.21594973 | -3.14684428 | 1.11867778  |

**9G**

|    |             |             |             |
|----|-------------|-------------|-------------|
| C  | -1.25833590 | -2.36892229 | -1.46661831 |
| H  | -1.93966204 | -2.69430037 | -0.67786100 |
| H  | -1.21437446 | -3.17062350 | -2.21717336 |
| C  | -1.77571626 | -1.09102805 | -2.13467260 |
| H  | -1.12955177 | -0.80666054 | -2.96929694 |
| H  | -2.77872128 | -1.27673053 | -2.54382859 |
| C  | 0.15551456  | -2.23375985 | -0.88890446 |
| O  | 1.00429730  | -1.55342979 | -1.54732061 |
| O  | 0.41386293  | -2.83354472 | 0.19704246  |
| C  | -1.89655912 | 0.11449729  | -1.19377028 |
| O  | -2.19054871 | -0.09467261 | 0.02942030  |
| O  | -1.69432530 | 1.25369391  | -1.70343102 |
| Na | 0.86880155  | 2.01814814  | 0.30176579  |
| O  | -1.76404998 | -2.40210705 | 1.89414223  |
| H  | -1.09508175 | -2.79910004 | 1.29782054  |
| H  | -2.09420623 | -1.64970211 | 1.36970269  |
| O  | -1.05673248 | 3.30845057  | -0.04900893 |
| H  | -1.69168945 | 3.19682222  | 0.68392814  |
| H  | -1.39590055 | 2.66124059  | -0.71428256 |
| O  | 2.73203582  | 0.62409855  | 1.23205951  |
| H  | 2.33208131  | 0.29018629  | 2.04749368  |
| H  | 2.98523012  | -0.20117970 | 0.73694981  |
| O  | 3.24959235  | -1.64367177 | -0.12156687 |
| H  | 3.04069568  | -2.39586974 | 0.44877368  |
| H  | 2.46767195  | -1.62494961 | -0.74456350 |
| O  | 3.01537418  | 2.78165117  | -0.63190254 |
| H  | 2.59443940  | 2.26963677  | -1.34761309 |
| H  | 3.30703839  | 2.11288735  | 0.01086784  |
| O  | 1.07378383  | 1.14428775  | -1.94324200 |
| H  | 0.13952267  | 1.34431775  | -2.15414163 |
| H  | 1.09350384  | 0.16117672  | -1.88455827 |
| O  | 0.94396633  | -1.52648958 | 2.54200354  |
| H  | 0.97593801  | -1.94603689 | 1.64967459  |
| H  | 0.09405947  | -1.86205406 | 2.88063478  |
| O  | -2.92791383 | 2.12119068  | 1.76858324  |
| H  | -2.94196651 | 1.42164889  | 1.08372180  |
| H  | -2.21001973 | 1.82313803  | 2.34979597  |
| O  | -0.36342266 | 0.81652385  | 1.84536486  |
| H  | -1.01031051 | 0.46647317  | 1.18980339  |
| H  | 0.13185837  | 0.02641165  | 2.14968374  |

**9H**

|    |             |             |             |
|----|-------------|-------------|-------------|
| C  | -2.72259789 | -0.13890297 | -0.21840436 |
| H  | -3.09345419 | 0.43875709  | 0.62972479  |
| H  | -3.53997335 | -0.76994241 | -0.58982257 |
| C  | -2.27852737 | 0.80008244  | -1.36093949 |
| H  | -2.05945378 | 0.22022364  | -2.25990016 |
| H  | -3.10674574 | 1.48305741  | -1.58730008 |
| C  | -1.59951088 | -1.06925604 | 0.24410131  |
| O  | -1.07126382 | -1.82706070 | -0.63683211 |
| O  | -1.24205334 | -1.04522290 | 1.45629395  |
| C  | -1.05993035 | 1.65972609  | -0.99451188 |
| O  | -1.16033785 | 2.42019877  | 0.01135232  |
| O  | -0.02770118 | 1.56400592  | -1.73148293 |
| O  | 2.39594188  | 0.62130259  | -0.81841781 |
| O  | -1.84953611 | 1.45876824  | 2.58149470  |
| H  | -1.67630267 | 0.51764877  | 2.36114674  |
| H  | -1.91061367 | 1.87397752  | 1.69757116  |
| O  | 0.44256971  | 4.44565453  | -1.56771557 |
| H  | -0.16263517 | 4.31778538  | -0.82251890 |
| H  | 0.56052247  | 3.52786150  | -1.86887727 |
| O  | 2.30595899  | -3.51600249 | -0.10514242 |
| H  | 2.30061119  | -2.95850791 | 0.69614649  |
| H  | 1.45811124  | -4.00108943 | -0.01618459 |
| Na | 1.35201760  | -1.43741724 | -0.87972399 |
| O  | -0.33993333 | -4.21001181 | 0.45522032  |
| H  | -0.36844893 | -4.00966978 | 1.39979839  |
| H  | -0.66480148 | -3.37619055 | 0.03168344  |
| O  | 0.19864522  | -0.93746351 | -2.94237785 |
| H  | 0.14249443  | 0.01680488  | -2.71105955 |
| H  | -0.51742582 | -1.33394715 | -2.41164840 |
| O  | 1.45786476  | -1.48299677 | 1.60935449  |
| H  | 0.47997050  | -1.36711273 | 1.67727033  |
| H  | 1.87190630  | -0.63864625 | 1.87702962  |
| O  | 0.58900986  | 2.68500145  | 2.12424683  |
| H  | 0.19834034  | 2.75350071  | 1.22328400  |
| H  | -0.15145888 | 2.26246249  | 2.61413206  |
| O  | 2.58632116  | 1.04579294  | 1.95072249  |
| H  | 1.83287223  | 1.71071441  | 2.07015083  |
| H  | 3.35080087  | 1.37907758  | 2.43221296  |
| H  | 2.58458491  | 0.87130117  | 0.10627983  |
| H  | 1.63610382  | 1.17047604  | -1.10535518 |

| 9I |             |             |             | 9J |             |             |             |
|----|-------------|-------------|-------------|----|-------------|-------------|-------------|
| C  | 1.75286768  | -2.25256478 | -1.10931267 | C  | -2.18773751 | 0.79889848  | -1.38784644 |
| H  | 1.57771888  | -3.03960363 | -0.37286339 | H  | -2.69802989 | 1.55479168  | -0.78675138 |
| H  | 2.63308986  | -2.54081291 | -1.70119226 | H  | -2.85990793 | 0.51860148  | -2.21103377 |
| C  | 0.54972843  | -2.12240132 | -2.05091722 | C  | -0.88607336 | 1.37143520  | -1.97005494 |
| H  | 0.73761308  | -1.35486861 | -2.80622845 | H  | -0.44342630 | 0.68642564  | -2.69610002 |
| H  | 0.40662222  | -3.07324192 | -2.58330613 | H  | -1.12070151 | 2.30534789  | -2.49761808 |
| C  | 2.12734781  | -0.95314905 | -0.38122177 | C  | -1.99505370 | -0.44772430 | -0.52158704 |
| O  | 2.08230906  | 0.12670354  | -1.06157458 | O  | -1.11096531 | -1.30475442 | -0.89068871 |
| O  | 2.48723787  | -1.02670296 | 0.82306160  | O  | -2.70521172 | -0.58743792 | 0.50359721  |
| C  | -0.78526041 | -1.80731184 | -1.35987640 | C  | 0.14696149  | 1.71430063  | -0.88908595 |
| O  | -0.99341546 | -2.28579376 | -0.20153381 | O  | -0.26257846 | 2.33354574  | 0.13652895  |
| O  | -1.60872825 | -1.09776212 | -2.00828322 | O  | 1.35056260  | 1.35631583  | -1.07397842 |
| Na | -1.11575422 | 1.92641929  | 0.13329760  | O  | 1.69225015  | 0.03952168  | 1.41567974  |
| O  | 0.65848305  | -2.78746950 | 2.05856811  | O  | -2.37512785 | 1.91298595  | 1.91855124  |
| H  | 1.49154605  | -2.41851213 | 1.70148527  | H  | -2.82694700 | 1.17860932  | 1.46506004  |
| H  | 0.04698691  | -2.69538670 | 1.29798814  | H  | -1.67268517 | 2.16897946  | 1.28273347  |
| O  | -3.07335444 | 0.81058307  | -0.73106587 | O  | 3.09123214  | 3.71914319  | -0.95795557 |
| H  | -3.49561582 | 0.36168588  | 0.01564554  | H  | 2.68535702  | 4.00183289  | -0.11723429 |
| H  | -2.66628147 | 0.06269717  | -1.23139369 | H  | 2.65611088  | 2.86474171  | -1.12295116 |
| O  | 0.54237458  | 2.62227146  | 1.74952267  | O  | 0.31916145  | -2.91254886 | 2.18201623  |
| H  | 0.62700398  | 1.90645944  | 2.39766463  | H  | -0.08212318 | -2.15838765 | 2.64863791  |
| H  | 1.36682700  | 2.60739267  | 1.21810114  | H  | -0.39231435 | -3.35053868 | 1.67930763  |
| O  | 2.52496251  | 2.52151223  | -0.12259993 | Na | 1.13317428  | -1.82058103 | 0.25948227  |
| H  | 3.45310190  | 2.64300114  | 0.10463516  | O  | -1.21400586 | -3.76460644 | -0.01325482 |
| H  | 2.42890467  | 1.56672554  | -0.43951592 | H  | -2.08971601 | -4.16448391 | -0.05666296 |
| O  | -0.03233204 | 3.78032505  | -1.15411400 | H  | -1.31513903 | -2.81259782 | -0.32085135 |
| H  | -0.08001308 | 3.03746033  | -1.78832629 | O  | 1.26598349  | -1.17982200 | -2.15385775 |
| H  | 0.85706675  | 3.69402050  | -0.77404996 | H  | 1.53579507  | -0.25587319 | -1.94556090 |
| O  | -0.15359845 | 1.22723065  | -2.09223457 | H  | 0.30465144  | -1.16450068 | -1.95186453 |
| H  | -0.76159781 | 0.49344331  | -2.31896447 | O  | -0.89728167 | -0.39086585 | 2.59864568  |
| H  | 0.69179351  | 0.78640551  | -1.84307958 | H  | -1.52099576 | -0.67150418 | 1.89404734  |
| O  | 0.88793552  | -0.07890000 | 2.85671468  | H  | -1.24133210 | 0.50080332  | 2.80612894  |
| H  | 1.53771615  | -0.15795606 | 2.12277712  | O  | 1.41413668  | 4.11315605  | 1.35361789  |
| H  | 0.62253351  | -1.01479395 | 2.96375525  | H  | 0.85189036  | 3.38886600  | 0.98195672  |
| O  | -3.13391060 | -1.47775510 | 1.10127141  | H  | 0.85751825  | 4.89892269  | 1.30216669  |
| H  | -2.37325486 | -1.82921775 | 0.54247121  | O  | 1.44710669  | -3.80546533 | -1.08142515 |
| H  | -3.38380905 | -2.18725024 | 1.70319894  | H  | 1.47128408  | -3.11814840 | -1.77129451 |
| O  | -1.72551796 | 0.70498177  | 2.06832730  | H  | 0.51171989  | -4.03854658 | -0.94125772 |
| H  | -2.23139005 | -0.10331342 | 1.84655886  | H  | 0.83761624  | 0.13103963  | 1.87882257  |
| H  | -0.84901530 | 0.40602671  | 2.38000824  | H  | 1.71844432  | 0.74339196  | 0.73885285  |

**9K**

|    |             |             |             |
|----|-------------|-------------|-------------|
| C  | -2.27473147 | 1.16988263  | -1.24454490 |
| H  | -2.67361808 | 1.83326380  | -0.47328868 |
| H  | -3.06053323 | 1.05060152  | -2.00364790 |
| C  | -1.03033390 | 1.78632963  | -1.89129911 |
| H  | -0.69555786 | 1.19827269  | -2.74895577 |
| H  | -1.28096557 | 2.78839022  | -2.26590942 |
| C  | -2.05796761 | -0.21304675 | -0.62041037 |
| O  | -1.14671393 | -0.96394008 | -1.11375100 |
| O  | -2.81264230 | -0.55151990 | 0.33120184  |
| C  | 0.14095441  | 1.96133258  | -0.92008749 |
| O  | -0.12928124 | 2.25879466  | 0.28119168  |
| O  | 1.31596331  | 1.81109437  | -1.37728915 |
| O  | 2.52356921  | 0.19444256  | 0.52079285  |
| O  | -2.05869328 | 1.62430900  | 2.15973226  |
| H  | -2.66765398 | 1.04961924  | 1.66469278  |
| H  | -1.42569006 | 1.92481753  | 1.47183126  |
| O  | 3.03335065  | 3.83700208  | -0.10661798 |
| H  | 2.81210149  | 3.56238885  | 0.79762787  |
| H  | 2.51837704  | 3.22117109  | -0.65871269 |
| O  | 0.23642539  | -2.93418014 | 1.46278520  |
| H  | -0.13481176 | -2.26339289 | 2.08228724  |
| H  | -0.55305236 | -3.26078472 | 0.97204165  |
| Na | 1.16372364  | -1.43954260 | -0.28881924 |
| O  | -1.90761125 | -3.40177698 | -0.18930033 |
| H  | -2.68849222 | -3.07758863 | 0.28221639  |
| H  | -1.61533194 | -2.58050687 | -0.66184053 |
| O  | 1.15309317  | -0.71582656 | -2.60345951 |
| H  | 1.39236738  | 0.21464054  | -2.41493289 |
| H  | 0.20096378  | -0.74663451 | -2.38137168 |
| O  | -1.37429626 | -1.11000898 | 2.64269358  |
| H  | -1.93619051 | -1.10794972 | 1.83702836  |
| H  | -1.29589205 | -0.15471674 | 2.82287987  |
| O  | 1.76373187  | 2.36174517  | 2.12541466  |
| H  | 1.03521137  | 2.36595660  | 1.43838762  |
| H  | 1.33162689  | 2.50570038  | 2.97505782  |
| O  | 2.26191343  | -3.63524867 | -0.17465175 |
| H  | 1.66367020  | -3.62395729 | 0.60302316  |
| H  | 1.91955610  | -4.31344362 | -0.76830935 |
| H  | 2.42203972  | 0.71221318  | 1.33970970  |
| H  | 2.31484255  | 0.85303970  | -0.17645387 |

**Table S12.** The Cartesian atomic coordinates of the typical low-lying isomers of  $\text{Na}^+(\text{DC}_2^{2-})(\text{H}_2\text{O})_{10}$  using B3LYP exchange-correlation functional with dispersion correction.

| <b>10A</b> |             |             |             | <b>10B</b> |             |             |             |
|------------|-------------|-------------|-------------|------------|-------------|-------------|-------------|
| C          | -0.40550000 | -2.71412072 | 1.68662829  | C          | -1.33597381 | 2.57563867  | -1.26399281 |
| H          | -1.11791342 | -2.25763383 | 2.37948348  | H          | -2.13857127 | 2.05755185  | -1.79648114 |
| H          | -0.09296454 | -3.68966784 | 2.07308777  | H          | -1.20851018 | 3.57741092  | -1.68636916 |
| C          | -1.09429670 | -2.93263140 | 0.31114760  | C          | -1.73063421 | 2.72044608  | 0.23227922  |
| H          | -0.43856115 | -3.53154987 | -0.32733763 | H          | -1.03173558 | 3.40046651  | 0.72715267  |
| H          | -2.03397046 | -3.47016975 | 0.47315481  | H          | -2.73980275 | 3.14321913  | 0.28222873  |
| C          | 0.82274601  | -1.81256646 | 1.53902250  | C          | -0.02727068 | 1.79449767  | -1.43479496 |
| O          | 1.90302313  | -2.31977897 | 1.14323907  | O          | 1.06340804  | 2.40696945  | -1.35282602 |
| O          | 0.64426756  | -0.56572185 | 1.75859184  | O          | -0.14165269 | 0.52590143  | -1.60056211 |
| C          | -1.39649037 | -1.60790905 | -0.39055053 | C          | -1.71943236 | 1.36792393  | 0.95133543  |
| O          | -2.47774168 | -1.01552776 | -0.10864984 | O          | -2.68874243 | 0.57727365  | 0.76023909  |
| O          | -0.51276028 | -1.15907747 | -1.19253040 | O          | -0.69491866 | 1.09312011  | 1.65507858  |
| Na         | 0.68785427  | 0.78727527  | -0.27565201 | Na         | 0.46571190  | -0.65487379 | 0.44422518  |
| O          | -1.85393300 | 0.23412053  | 2.49249238  | O          | -1.89343430 | -2.96401848 | -1.40641237 |
| H          | -2.33254146 | -0.08212543 | 1.70735954  | H          | -2.23200938 | -2.05597210 | -1.68533754 |
| H          | -0.92937098 | -0.07319703 | 2.32358771  | H          | -2.39330580 | -3.63362861 | -1.88477398 |
| O          | -0.95856533 | 0.59183042  | -3.26695193 | O          | -2.59011062 | -0.48746549 | -1.84402790 |
| H          | -0.81032239 | -0.12764872 | -2.61247596 | H          | -2.92151439 | -0.13356704 | -0.99332263 |
| H          | -1.81111932 | 0.95928804  | -2.97496115 | H          | -1.67714306 | -0.08858349 | -1.87915970 |
| O          | 2.82365238  | -0.48488530 | -0.62846667 | O          | 1.45842000  | 2.82125837  | 1.42960414  |
| H          | 2.69032439  | -1.03684672 | 0.18055986  | H          | 0.63771337  | 2.31487257  | 1.63069844  |
| H          | 2.65803457  | -1.12886323 | -1.34354134 | H          | 1.41047730  | 2.95449590  | 0.46366785  |
| O          | 1.58458493  | 2.01262329  | 1.88766528  | O          | 2.60429643  | 0.31909115  | 1.21393528  |
| H          | 2.18375895  | 2.20557725  | 1.13253794  | H          | 2.37149585  | 1.26782739  | 1.34645684  |
| H          | 1.54785529  | 1.04171016  | 1.99748970  | H          | 2.26555429  | -0.12750770 | 2.01988995  |
| O          | 2.96631709  | 2.21862756  | -0.49696613 | O          | 0.44003326  | -3.34956271 | 2.10989379  |
| H          | 2.36884131  | 2.41996479  | -1.24738323 | H          | -0.46396938 | -3.01925141 | 1.93124448  |
| H          | 3.19334440  | 1.27326626  | -0.61815763 | H          | 0.84488728  | -3.34345041 | 1.22133045  |
| O          | 1.67054796  | -2.80711464 | -1.70628597 | O          | 3.42073581  | 0.81532426  | -1.42437222 |
| H          | 1.85019946  | -3.01877676 | -0.77260662 | H          | 2.65004135  | 1.42364765  | -1.47785027 |
| H          | 0.84572695  | -2.27532102 | -1.64489728 | H          | 3.40820828  | 0.51956691  | -0.49551835 |
| O          | -1.04006021 | 2.89758660  | 2.33197897  | O          | 0.95348138  | -0.80621116 | 3.06163796  |
| H          | -0.07401082 | 2.72780959  | 2.33752091  | H          | 0.78662709  | -1.75896551 | 2.88284851  |
| H          | -1.44258145 | 2.02138580  | 2.52743636  | H          | 0.13966253  | -0.31088154 | 2.85559363  |
| O          | -1.03731663 | 2.52245966  | -0.32855217 | O          | 0.85079104  | -2.75979006 | -0.64029636 |
| H          | -1.14641715 | 2.78789093  | 0.62113849  | H          | 1.35681405  | -2.31545277 | -1.37160539 |
| H          | -1.88961529 | 2.17363806  | -0.65881153 | H          | -0.02972664 | -2.96205061 | -1.01025800 |
| O          | 0.84069622  | 2.42090914  | -2.25781496 | O          | -1.64096319 | -1.86895098 | 1.15462142  |
| H          | 0.16661996  | 2.77296948  | -1.63832049 | H          | -2.13730215 | -1.00941901 | 1.16350120  |
| H          | 0.32256208  | 1.79063701  | -2.81076082 | H          | -1.93011687 | -2.35899235 | 0.36415089  |
| O          | -3.11528656 | 1.12684494  | -1.47164895 | O          | 1.86010876  | -1.14810415 | -2.53240269 |
| H          | -4.06533244 | 1.26214276  | -1.38810250 | H          | 1.11624235  | -0.52141050 | -2.39438669 |

|   |             |            |             |   |            |             |             |
|---|-------------|------------|-------------|---|------------|-------------|-------------|
| H | -2.88947827 | 0.28045283 | -0.96845543 | H | 2.62475216 | -0.59865648 | -2.24131105 |
|---|-------------|------------|-------------|---|------------|-------------|-------------|

**10C**

|    |             |             |             |
|----|-------------|-------------|-------------|
| C  | 2.50386979  | -0.74688441 | -1.75837815 |
| H  | 1.88004116  | -1.04539456 | -2.60706289 |
| H  | 3.50501738  | -1.15583620 | -1.94782810 |
| C  | 2.56633126  | 0.77794926  | -1.64849633 |
| H  | 3.32214411  | 1.09449357  | -0.92443612 |
| H  | 2.85534304  | 1.20213482  | -2.62038521 |
| C  | 1.93684728  | -1.46851015 | -0.52706892 |
| O  | 1.75215133  | -0.79556505 | 0.54213130  |
| O  | 1.67257399  | -2.69024549 | -0.66486936 |
| C  | 1.23365547  | 1.41949805  | -1.25395549 |
| O  | 0.15635542  | 0.82304386  | -1.58864465 |
| O  | 1.26657927  | 2.49055985  | -0.58845693 |
| Na | -0.36044242 | 0.40224452  | 0.82039959  |
| O  | -0.74762861 | -3.61660731 | -0.58568237 |
| H  | -0.71739128 | -4.51306017 | -0.93833206 |
| H  | 0.20927454  | -3.31697053 | -0.50179873 |
| O  | -0.90519702 | 2.76496228  | 1.06996963  |
| H  | -1.80212396 | 2.71313703  | 0.65688419  |
| H  | -0.23753848 | 2.87142006  | 0.35452285  |
| O  | -2.06869260 | -2.74677725 | 1.76597548  |
| H  | -1.65703423 | -3.21849645 | 1.01541223  |
| H  | -1.31164107 | -2.34038959 | 2.24375725  |
| O  | 0.14291268  | -1.36219245 | 2.66629618  |
| H  | 0.19254832  | -0.46116007 | 3.04841178  |
| H  | 0.85360068  | -1.39478966 | 1.98565990  |
| O  | 0.39645246  | 1.37881488  | 3.06335903  |
| H  | 1.30811920  | 1.53821504  | 2.72187765  |
| H  | -0.16292434 | 2.03437744  | 2.59611850  |
| O  | 2.73844298  | 1.56961057  | 1.62736608  |
| H  | 2.41331979  | 2.15849758  | 0.91701782  |
| H  | 2.59638271  | 0.67781128  | 1.24262675  |
| O  | -2.50633590 | -0.45387625 | 0.37169104  |
| H  | -2.54314971 | -1.27648815 | 0.92028827  |
| H  | -2.30725608 | -0.75790790 | -0.54268269 |
| O  | -1.48197884 | -1.31205894 | -2.05203038 |
| H  | -1.22110676 | -2.19500134 | -1.72024417 |
| H  | -0.68876830 | -0.73717445 | -2.00260773 |
| O  | -3.31765728 | 2.17878475  | -0.07007043 |
| H  | -3.09249916 | 2.09626792  | -1.02295708 |
| H  | -3.28982818 | 1.25090180  | 0.23807602  |
| O  | -2.27915656 | 1.57036868  | -2.58436095 |
| H  | -1.35877291 | 1.49244671  | -2.24214749 |
| H  | -2.52048605 | 0.65033724  | -2.76510672 |

**10D**

|    |             |             |             |
|----|-------------|-------------|-------------|
| C  | -1.01818062 | -3.12366818 | 0.87214115  |
| H  | -2.00890477 | -2.79578295 | 1.19960391  |
| H  | -0.80946906 | -4.11860806 | 1.27919613  |
| C  | -0.99522713 | -3.20942167 | -0.67905037 |
| H  | -0.07301517 | -3.70311840 | -1.00014511 |
| H  | -1.85671257 | -3.79935878 | -1.00916427 |
| C  | 0.03844982  | -2.13710643 | 1.37736259  |
| O  | 1.23481628  | -2.51346166 | 1.46558240  |
| O  | -0.36411217 | -0.94560668 | 1.61069559  |
| C  | -1.06820149 | -1.81652876 | -1.30953167 |
| O  | -2.18395527 | -1.24644756 | -1.40977434 |
| O  | 0.04914114  | -1.28582908 | -1.63991577 |
| Na | 0.49200018  | 0.66293954  | -0.07560277 |
| O  | -2.98692009 | -0.30054405 | 1.21539068  |
| H  | -3.04725428 | -0.61702123 | 0.29613253  |
| H  | -2.07168111 | -0.57510335 | 1.46892295  |
| O  | -1.44522361 | 1.38457163  | -1.32507060 |
| H  | -1.80861677 | 0.49147769  | -1.53303848 |
| H  | -1.84415173 | 1.65221512  | -0.47095863 |
| O  | 2.61607276  | -0.34040923 | 0.57976974  |
| H  | 2.19689370  | -1.02142571 | 1.16165306  |
| H  | 2.87007083  | -0.88232452 | -0.19353413 |
| O  | 0.22193822  | 1.60504038  | 2.29063146  |
| H  | 1.15734529  | 1.90029246  | 2.18433570  |
| H  | 0.20745610  | 0.62652739  | 2.33572046  |
| O  | 2.75693999  | 2.27504660  | 1.48874246  |
| H  | 2.39980404  | 2.67670432  | 0.66907079  |
| H  | 2.99131204  | 1.36488047  | 1.21920261  |
| O  | 2.44170985  | -2.48594837 | -1.20878152 |
| H  | 2.26399727  | -2.89617186 | -0.34468278 |
| H  | 1.55187641  | -2.12773908 | -1.45201181 |
| O  | -2.16913231 | 2.35411230  | 1.18949166  |
| H  | -1.32033309 | 2.20400862  | 1.66707082  |
| H  | -2.68552465 | 1.52930776  | 1.33816924  |
| O  | -1.22025026 | 4.13279433  | -0.92090749 |
| H  | -1.64641349 | 3.81582484  | -0.10279543 |
| H  | -1.45101516 | 3.43251649  | -1.55619000 |
| O  | 1.31974141  | 2.92896052  | -0.78956558 |
| H  | 0.49488765  | 3.46144312  | -0.81058943 |
| H  | 1.32958661  | 2.37184222  | -1.59337342 |
| O  | 1.36892773  | 0.81938364  | -2.59062921 |
| H  | 0.68342219  | 0.12525915  | -2.42767492 |
| H  | 2.19714832  | 0.33177186  | -2.67768625 |

## 10E

|    |             |             |             |
|----|-------------|-------------|-------------|
| C  | 1.61715515  | 2.80193727  | 0.73576912  |
| H  | 2.31055996  | 2.73331483  | -0.10549594 |
| H  | 2.16805934  | 3.23814429  | 1.58153509  |
| C  | 0.42164173  | 3.69810252  | 0.38440108  |
| H  | -0.17887171 | 3.91152249  | 1.27269314  |
| H  | 0.79110879  | 4.65673951  | -0.00546506 |
| C  | 1.21992006  | 1.38340062  | 1.15215133  |
| O  | 0.15729853  | 1.22296182  | 1.82353171  |
| O  | 1.98982987  | 0.43010525  | 0.80241246  |
| C  | -0.51148887 | 3.07804841  | -0.67024333 |
| O  | 0.02592892  | 2.30489753  | -1.54259428 |
| O  | -1.73789324 | 3.32228380  | -0.59055286 |
| O  | -1.40899245 | -3.03341635 | -0.32151237 |
| H  | -1.52300439 | -2.87880847 | -1.27758858 |
| H  | -0.54234913 | -3.49008070 | -0.21411198 |
| O  | 2.29457279  | 0.80787145  | -1.91892106 |
| H  | 2.49652297  | 0.68491353  | -0.96765611 |
| H  | 1.54171509  | 1.44506339  | -1.88514282 |
| O  | -2.49498327 | 1.18841295  | 0.97709384  |
| H  | -2.56498654 | 2.03131162  | 0.47601396  |
| H  | -1.61469534 | 1.27314045  | 1.40433788  |
| O  | 2.15975959  | -2.13660898 | 1.85908135  |
| H  | 2.32367256  | -1.21091660 | 1.57698002  |
| H  | 1.31751992  | -2.06076903 | 2.35594170  |
| O  | 1.25112142  | -3.68729847 | -0.20535978 |
| H  | 1.71556582  | -3.27231734 | 0.55875501  |
| H  | 1.49511517  | -3.13761359 | -0.97811558 |
| O  | -0.32677932 | -1.32812761 | 2.57683469  |
| H  | -0.17152377 | -0.35808862 | 2.47195861  |
| H  | -1.28826205 | -1.48195568 | 2.43378429  |
| O  | -1.42751606 | -1.87090197 | -2.87801815 |
| H  | -2.00736587 | -1.77811153 | -3.64115235 |
| H  | -1.50698379 | -1.03881732 | -2.31738833 |
| O  | -2.87584585 | -1.59144003 | 1.59991710  |
| H  | -2.98769732 | -0.66980956 | 1.30305035  |
| H  | -2.52000686 | -2.10596208 | 0.84715806  |
| O  | 1.29437408  | -1.68583521 | -2.09125838 |
| H  | 1.67899546  | -0.77370311 | -2.18671733 |
| H  | 0.48943944  | -1.73586605 | -2.63579710 |
| O  | -1.24227629 | 0.05913695  | -1.20082769 |
| H  | -0.79981413 | 0.91332314  | -1.49423722 |
| H  | -1.88091792 | 0.35395147  | -0.51572237 |
| Na | 0.29486549  | -1.22272133 | 0.15887619  |

## 10F

|    |             |             |             |
|----|-------------|-------------|-------------|
| C  | -1.09674956 | -3.03934568 | -0.72690960 |
| H  | -1.22943259 | -2.84937007 | -1.79489817 |
| H  | -1.70592409 | -3.91615875 | -0.46643404 |
| C  | 0.37058303  | -3.33588686 | -0.39472619 |
| H  | 0.46084499  | -3.66335772 | 0.64608285  |
| H  | 0.74351408  | -4.15949459 | -1.01732302 |
| C  | -1.64647963 | -1.84735792 | 0.06121860  |
| O  | -1.31467852 | -1.73851377 | 1.27759235  |
| O  | -2.37671610 | -1.01016222 | -0.56191199 |
| C  | 1.33629337  | -2.15141407 | -0.56709987 |
| O  | 0.89291223  | -1.07199567 | -1.08066748 |
| O  | 2.51390218  | -2.32657865 | -0.15628149 |
| O  | -1.82461613 | 0.55930240  | 2.72959278  |
| H  | -1.70323061 | -0.34419927 | 2.35411891  |
| H  | -0.92874473 | 0.93176411  | 2.77812569  |
| O  | -2.95621632 | 1.42837190  | 0.47333885  |
| H  | -2.65239669 | 1.26321286  | 1.40136629  |
| H  | -2.90122743 | 0.53785020  | 0.04644640  |
| O  | 3.51137899  | -0.42143577 | 1.31052292  |
| H  | 4.19261689  | -0.83973738 | 1.84781627  |
| H  | 3.23070063  | -1.10419620 | 0.62279428  |
| Na | -0.38239693 | 0.57934872  | 0.24872354  |
| O  | -1.13991974 | -0.53237579 | -2.96134629 |
| H  | -1.80982901 | -0.74917611 | -2.27559268 |
| H  | -0.32113462 | -0.84671252 | -2.52296788 |
| O  | 2.30096025  | 1.21431669  | -1.85571418 |
| H  | 2.04073260  | 0.30243789  | -1.59819824 |
| H  | 1.43430494  | 1.62625043  | -2.04533307 |
| O  | 2.70781290  | 2.24805972  | 0.63690127  |
| H  | 3.08237153  | 1.45490901  | 1.05957033  |
| H  | 2.64589335  | 1.97305394  | -0.31211528 |
| O  | -0.37849790 | 1.83193471  | -1.86934465 |
| H  | -0.98863754 | 2.57227467  | -1.69156795 |
| H  | -0.81228952 | 1.15051853  | -2.43357039 |
| O  | 0.08973304  | 2.60259024  | 1.35681946  |
| H  | -0.31520725 | 3.28282905  | 0.79783541  |
| H  | 1.05886959  | 2.57664144  | 1.15579370  |
| O  | -1.94846184 | 3.61378807  | -0.51918501 |
| H  | -2.62972309 | 4.27766727  | -0.66760732 |
| H  | -2.40106241 | 2.80322389  | -0.13047528 |
| O  | 0.86806816  | -0.29483264 | 2.17532714  |
| H  | 0.44133888  | -1.14866797 | 1.99185216  |
| H  | 1.82332660  | -0.38561059 | 1.98652275  |



**10G**

|    |             |             |             |
|----|-------------|-------------|-------------|
| C  | 0.19684310  | -3.36528464 | 0.98268718  |
| H  | -0.57082811 | -3.21703703 | 1.74883326  |
| H  | 0.81252240  | -4.23278646 | 1.24033590  |
| C  | -0.50400172 | -3.62227341 | -0.37651768 |
| H  | 0.24014125  | -3.65530271 | -1.17898796 |
| H  | -1.01366201 | -4.59115649 | -0.32005597 |
| C  | 1.10759432  | -2.14438057 | 0.88985724  |
| O  | 2.29216094  | -2.33234790 | 0.50593743  |
| O  | 0.60568757  | -0.99704381 | 1.15522037  |
| C  | -1.56318283 | -2.54641546 | -0.65568172 |
| O  | -2.56994511 | -2.52457495 | 0.09496131  |
| O  | -1.33281957 | -1.71619642 | -1.60100411 |
| Na | 0.11719378  | 1.04770808  | -0.13433170 |
| O  | -1.95837821 | -0.61976333 | 1.94551495  |
| H  | -2.45301912 | -1.31478631 | 1.45683583  |
| H  | -1.01800970 | -0.85640923 | 1.74250016  |
| O  | -2.25775668 | 0.60924739  | -0.71526354 |
| H  | -2.41728596 | 0.34456968  | 0.20691214  |
| H  | -2.07715851 | -0.25374689 | -1.18335951 |
| O  | 3.30449544  | -0.51631714 | -0.98000180 |
| H  | 2.97817208  | -1.20607608 | -0.30535902 |
| H  | 4.13780671  | -0.83382626 | -1.34297149 |
| O  | 1.61173720  | 1.27341027  | 2.30366679  |
| H  | 2.03383079  | 1.71484433  | 1.53833711  |
| H  | 1.47766277  | 0.34766543  | 1.99817501  |
| O  | 2.42527962  | 1.97351034  | -0.24202663 |
| H  | 2.10330810  | 2.36497723  | -1.09052100 |
| H  | 2.89274396  | 1.14976480  | -0.49937622 |
| O  | 1.18053266  | 2.56461066  | -2.59909532 |
| H  | 0.33049197  | 2.90731014  | -2.24699363 |
| H  | 1.00206769  | 1.61274619  | -2.73797607 |
| O  | -0.95940829 | 1.95353757  | 1.96893135  |
| H  | -0.04120245 | 1.78326588  | 2.30045763  |
| H  | -1.49052413 | 1.14959920  | 2.13831701  |
| O  | -1.84084325 | 4.33185883  | 1.11991849  |
| H  | -1.54802516 | 3.50131272  | 1.57350377  |
| H  | -2.79149606 | 4.39446360  | 1.26717670  |
| O  | -1.14851164 | 3.01681108  | -1.24335972 |
| H  | -1.39306607 | 3.62293288  | -0.51390607 |
| H  | -1.73053853 | 2.22891695  | -1.15789333 |
| O  | 0.76735592  | -0.15145124 | -2.13291417 |
| H  | 0.09749345  | -0.87482910 | -2.02589496 |
| H  | 1.64875819  | -0.48824705 | -1.88667667 |

**10H**

|    |             |             |             |
|----|-------------|-------------|-------------|
| C  | -1.17769476 | 2.56223054  | 1.38268970  |
| H  | -0.58610684 | 3.42969800  | 1.08441241  |
| H  | -1.62447812 | 2.80536002  | 2.35676777  |
| C  | -2.29836216 | 2.28672905  | 0.36592454  |
| H  | -3.09221112 | 1.68580775  | 0.81437525  |
| H  | -2.74331187 | 3.24245770  | 0.05684668  |
| C  | -0.24057615 | 1.36869117  | 1.60267570  |
| O  | -0.71251233 | 0.20314983  | 1.47578708  |
| O  | 0.96768789  | 1.61284193  | 1.91823815  |
| C  | -1.81552812 | 1.56519492  | -0.89831219 |
| O  | -0.68455192 | 1.90581902  | -1.38134381 |
| O  | -2.55992923 | 0.66907013  | -1.38230096 |
| Na | 0.32745827  | -1.44131536 | 0.10904587  |
| O  | 1.42049920  | 3.49429963  | -0.51654574 |
| H  | 1.37047689  | 3.37068285  | 0.44354234  |
| H  | 0.64199777  | 2.98640381  | -0.84751842 |
| O  | -1.10775598 | -1.55282658 | -1.84819737 |
| H  | -0.49375841 | -1.36464736 | -2.57312147 |
| H  | -1.69216297 | -0.75556759 | -1.80846584 |
| O  | 1.52863552  | -3.42327346 | -1.01910314 |
| H  | 2.05892471  | -2.61525147 | -1.13816675 |
| H  | 1.52388029  | -3.62235467 | -0.06093862 |
| O  | 2.00551917  | -0.97921813 | 1.95696806  |
| H  | 2.86214992  | -0.81288549 | 1.54374103  |
| H  | 1.60376367  | -0.09034537 | 2.11298967  |
| O  | -3.13611895 | -0.88114800 | 0.93029729  |
| H  | -3.24930108 | -0.46272323 | 0.05409249  |
| H  | -2.34738795 | -0.40002081 | 1.27458053  |
| O  | 3.14422528  | 1.38973633  | 0.21861916  |
| H  | 2.43640109  | 1.43605816  | 0.89774737  |
| H  | 2.89989809  | 2.14475017  | -0.35103764 |
| O  | 0.53673938  | 0.39044795  | -3.14395661 |
| H  | 0.00334091  | 0.98942250  | -2.53155423 |
| H  | 0.80114641  | 0.92451138  | -3.90058934 |
| O  | 2.19338820  | -0.70714127 | -1.24991129 |
| H  | 1.72632227  | -0.30376351 | -2.01387216 |
| H  | 2.62571223  | 0.03278683  | -0.76356217 |
| O  | -1.55365213 | -3.07509345 | 0.50327641  |
| H  | -1.43033346 | -3.01642130 | -0.46045196 |
| H  | -2.23641864 | -2.38688584 | 0.70100639  |
| O  | 0.90347967  | -3.55486024 | 1.70493656  |
| H  | -0.04880291 | -3.45645261 | 1.49063654  |
| H  | 1.21421806  | -2.70770020 | 2.07314827  |

**10I**

|    |             |             |             |
|----|-------------|-------------|-------------|
| C  | 2.67515595  | 1.04362508  | 0.91207427  |
| H  | 3.24672423  | 0.82557832  | 0.00502245  |
| H  | 3.36909651  | 0.99392918  | 1.76299374  |
| C  | 2.06165695  | 2.44615047  | 0.85247063  |
| H  | 1.54737800  | 2.66085502  | 1.79766254  |
| H  | 2.84238457  | 3.20662998  | 0.74374213  |
| C  | 1.63980233  | -0.06137124 | 1.10685132  |
| O  | 0.68710513  | 0.12572606  | 1.91636999  |
| O  | 1.77034624  | -1.11536797 | 0.39646960  |
| C  | 1.02206367  | 2.67743126  | -0.25549159 |
| O  | 0.52378933  | 1.64010692  | -0.83298099 |
| O  | 0.68375139  | 3.85630069  | -0.48498604 |
| Na | -0.62518917 | -0.42769587 | -0.24260341 |
| O  | 1.59723441  | -3.75773631 | 0.26344818  |
| H  | 2.51852226  | -4.03091090 | 0.33413791  |
| H  | 1.59368957  | -2.77564120 | 0.42072652  |
| O  | -1.99413316 | 3.77366891  | -0.11882124 |
| H  | -2.37337542 | 3.17937304  | -0.78179727 |
| H  | -1.07257108 | 3.94949958  | -0.42684864 |
| O  | -1.10536309 | -4.43851568 | 0.94645196  |
| H  | -0.13356731 | -4.48001347 | 0.97144523  |
| H  | -1.29423519 | -3.54667272 | 1.30953804  |
| O  | -1.31735015 | -1.79627703 | 1.72397145  |
| H  | -2.06603489 | -1.20201666 | 1.51587136  |
| H  | -0.57826427 | -1.21895748 | 2.02229075  |
| O  | -2.87267076 | 0.23856353  | 0.68400640  |
| H  | -2.49288630 | 0.94229048  | 1.27140339  |
| H  | -2.81873288 | 0.61295586  | -0.21845895 |
| O  | -1.45019262 | 2.07781672  | 2.03701986  |
| H  | -1.51166061 | 2.77163573  | 1.34092383  |
| H  | -0.57373033 | 1.65270149  | 1.98825511  |
| O  | -0.47462420 | -3.89118592 | -1.71491850 |
| H  | -0.99717227 | -4.12113835 | -0.91492395 |
| H  | 0.43009476  | -3.89807120 | -1.35266872 |
| O  | 1.87274080  | -0.30121988 | -2.25926199 |
| H  | 2.08041824  | -0.74494400 | -1.41088632 |
| H  | 1.52584663  | 0.55868354  | -1.94015726 |
| O  | -0.70769699 | -1.26375714 | -2.42967896 |
| H  | 0.23381434  | -1.02309487 | -2.59143320 |
| H  | -0.72079459 | -2.24130312 | -2.28553979 |
| O  | -1.93769689 | 1.22694761  | -1.78340043 |
| H  | -1.77699930 | 0.44733668  | -2.34525701 |
| H  | -1.03077091 | 1.56790560  | -1.56002225 |

**10J**

|    |             |             |             |
|----|-------------|-------------|-------------|
| C  | 1.85379036  | -2.49335807 | -1.04247239 |
| H  | 1.59078575  | -3.29890638 | -0.35356009 |
| H  | 2.77739440  | -2.78811414 | -1.56045721 |
| C  | 0.74729557  | -2.29105755 | -2.08353485 |
| H  | 1.02327721  | -1.49830845 | -2.78378432 |
| H  | 0.62836678  | -3.21457353 | -2.66741522 |
| C  | 2.19301687  | -1.23211914 | -0.23802545 |
| O  | 2.20102637  | -0.12416780 | -0.87662811 |
| O  | 2.47371035  | -1.35378087 | 0.98236595  |
| C  | -0.63583079 | -1.96330915 | -1.50348816 |
| O  | -0.94947659 | -2.46358382 | -0.37748204 |
| O  | -1.38576489 | -1.22329601 | -2.20342758 |
| Na | -1.37272715 | 1.66927939  | 0.11452099  |
| O  | 0.47232732  | -3.06633472 | 2.00889647  |
| H  | 1.35280810  | -2.73618165 | 1.74014935  |
| H  | -0.05895733 | -2.93232539 | 1.19589200  |
| O  | -3.12507463 | 0.45221920  | -0.96339536 |
| H  | -3.56362901 | -0.08707468 | -0.28780363 |
| H  | -2.60634132 | -0.21723837 | -1.47295647 |
| O  | 0.44124651  | 2.29428352  | 1.75525204  |
| H  | 0.44627303  | 1.56291042  | 2.39315492  |
| H  | 1.31138441  | 2.26837055  | 1.29724904  |
| O  | -1.10232639 | 4.08128439  | 0.23612502  |
| H  | -0.64071291 | 3.80304682  | 1.04596320  |
| H  | -0.37976214 | 4.12663237  | -0.43010251 |
| O  | 2.69535340  | 2.16059481  | 0.22041309  |
| H  | 3.56940660  | 2.19428609  | 0.62426405  |
| H  | 2.58062344  | 1.22389266  | -0.15663338 |
| O  | 1.01494898  | 3.69622185  | -1.54667954 |
| H  | 0.61888985  | 2.87898830  | -1.91135691 |
| H  | 1.73874529  | 3.36257967  | -0.98432689 |
| O  | -0.00499281 | 1.13495789  | -1.79897209 |
| H  | -0.55861775 | 0.45148947  | -2.22876262 |
| H  | 0.81029651  | 0.64627506  | -1.53352952 |
| O  | 0.70834512  | -0.38272561 | 2.87123793  |
| H  | 1.42528712  | -0.46734934 | 2.20375734  |
| H  | 0.41407160  | -1.31458384 | 2.93479891  |
| O  | -3.17348629 | -1.78182611 | 0.83332386  |
| H  | -2.36793187 | -2.08154676 | 0.30565113  |
| H  | -3.46895091 | -2.54062058 | 1.34806718  |
| O  | -1.90744647 | 0.38568365  | 2.00845593  |
| H  | -2.38468220 | -0.41798032 | 1.71523270  |
| H  | -1.03392785 | 0.08403666  | 2.32178898  |

**10K**

|    |             |             |             |
|----|-------------|-------------|-------------|
| C  | -1.97893858 | 0.02070409  | -2.03283675 |
| H  | -2.93976209 | 0.12543668  | -1.52295097 |
| H  | -2.18326550 | -0.49901166 | -2.97942009 |
| C  | -1.36129211 | 1.39347846  | -2.31298520 |
| H  | -0.55247547 | 1.32348073  | -3.04392278 |
| H  | -2.13300963 | 2.04728239  | -2.74126672 |
| C  | -1.10865601 | -0.91831496 | -1.19691908 |
| O  | 0.14161879  | -0.72515154 | -1.13378302 |
| O  | -1.7136806  | -1.86497217 | -0.5964551  |
| C  | -0.81928876 | 2.08422207  | -1.05434375 |
| O  | -1.48122947 | 1.95049653  | 0.02911263  |
| O  | 0.24857209  | 2.74272469  | -1.17770966 |
| Na | 1.70168637  | 0.32226864  | 0.77491395  |
| O  | -3.33495282 | -0.13169214 | 1.06807786  |
| H  | -3.11462976 | -0.81422161 | 0.41176453  |
| H  | -2.86483833 | 0.65972578  | 0.74097879  |
| O  | 1.95837798  | 2.66776201  | 0.92657501  |
| H  | 1.40228294  | 3.02519842  | 1.64303460  |
| H  | 1.40047799  | 2.84697768  | 0.13442810  |
| O  | 1.74926934  | -1.74849552 | 2.00291879  |
| H  | 0.83184247  | -1.91221725 | 2.27200821  |
| H  | 1.87490320  | -2.27591544 | 1.18381187  |
| O  | -0.55352322 | -4.33913770 | 0.02336957  |
| H  | -0.66071407 | -4.22688383 | 0.97868312  |
| H  | -1.01998806 | -3.55852534 | -0.34742065 |
| O  | 3.45937849  | -0.44646812 | -0.61453866 |
| H  | 3.13323137  | 0.04908894  | -1.39783717 |
| H  | 3.26021839  | -1.38121285 | -0.77792519 |
| O  | 1.91871433  | 0.87820341  | -2.50237271 |
| H  | 1.57225577  | 1.74100541  | -2.19945050 |
| H  | 1.21072596  | 0.26746297  | -2.20747763 |
| O  | -1.22747766 | -2.05591035 | 2.06607270  |
| H  | -1.31812757 | -1.99220393 | 1.08317817  |
| H  | -2.07637957 | -1.71224801 | 2.38582268  |
| O  | -0.40506844 | 3.46307001  | 2.38147421  |
| H  | -0.81926205 | 3.27692150  | 1.51687209  |
| H  | -0.42108860 | 2.58925317  | 2.80576551  |
| O  | -0.24609565 | 0.66174713  | 2.06916983  |
| H  | -0.75205229 | 1.07472683  | 1.33166810  |
| H  | -0.62038375 | -0.22743921 | 2.18994520  |
| O  | 1.76451429  | -2.84188521 | -0.54093134 |
| H  | 1.17474000  | -3.61385159 | -0.42860350 |
| H  | 1.14696406  | -2.11910861 | -0.80771370 |

**10L**

|    |             |             |             |
|----|-------------|-------------|-------------|
| C  | -1.64792786 | -1.30694242 | -2.10408967 |
| H  | -2.43216234 | -1.90900714 | -1.63822085 |
| H  | -1.54789937 | -1.65710621 | -3.14119376 |
| C  | -2.01916113 | 0.17453731  | -2.09402605 |
| H  | -1.29833931 | 0.76014579  | -2.67257753 |
| H  | -3.00020500 | 0.31687216  | -2.56745837 |
| C  | -0.32430644 | -1.62252130 | -1.40487882 |
| O  | 0.56548360  | -0.71356475 | -1.33561780 |
| O  | -0.17170774 | -2.79304147 | -0.94711858 |
| C  | -2.09366163 | 0.78741098  | -0.69186780 |
| O  | -2.26786488 | 0.02543701  | 0.30881062  |
| O  | -1.97169052 | 2.04622575  | -0.61646257 |
| Na | 1.20838755  | 0.86180510  | 0.60974613  |
| O  | -2.37579380 | -2.86744718 | 0.84820167  |
| H  | -1.78179922 | -3.09878561 | 0.10965918  |
| H  | -2.50726807 | -1.90787109 | 0.72314296  |
| O  | -0.14052050 | 2.78106918  | 1.19048042  |
| H  | -0.50710934 | 2.67768139  | 2.08617170  |
| H  | -0.91943153 | 2.55821113  | 0.62341739  |
| O  | 2.80827883  | -0.98543763 | 1.28994379  |
| H  | 2.25123004  | -1.49313332 | 1.89697097  |
| H  | 2.92262699  | -1.56923238 | 0.50163485  |
| O  | 2.77567236  | -2.30794769 | -1.08579146 |
| H  | 2.24715384  | -3.11555950 | -1.00895561 |
| H  | 2.07636781  | -1.64527459 | -1.30596718 |
| O  | 3.55652799  | 1.70034968  | 0.64668019  |
| H  | 3.27253239  | 1.69465142  | -0.28740160 |
| H  | 3.65433664  | 0.76904506  | 0.90695087  |
| O  | 1.91711286  | 1.62701006  | -1.67595576 |
| H  | 1.30210579  | 2.39191580  | -1.76910764 |
| H  | 1.39228332  | 0.82943038  | -1.87928388 |
| O  | 0.44502148  | -2.92630177 | 1.71359974  |
| H  | 0.42850189  | -2.88557697 | 0.72685583  |
| H  | -0.46660782 | -3.20190887 | 1.91509441  |
| O  | -1.99171483 | 1.65476336  | 3.07698082  |
| H  | -2.45318483 | 1.43869515  | 2.24894190  |
| H  | -1.36273705 | 0.91476386  | 3.16065663  |
| O  | -0.23711149 | -0.27123837 | 2.07226736  |
| H  | -0.99011475 | -0.21002152 | 1.43787898  |
| H  | 0.02622102  | -1.21595301 | 2.06053487  |
| O  | 0.03256042  | 3.63395941  | -1.60812080 |
| H  | 0.22789301  | 3.93587242  | -0.70686910 |
| H  | -0.78305822 | 3.09605351  | -1.48348995 |

**10M**

|    |             |             |             |
|----|-------------|-------------|-------------|
| C  | -0.49225205 | 3.28356314  | -0.52641308 |
| H  | -0.45113667 | 3.66082738  | 0.49876557  |
| H  | -0.96683738 | 4.06198682  | -1.14006523 |
| C  | 0.92592297  | 3.01818909  | -1.05219871 |
| H  | 0.89786906  | 2.70636283  | -2.09807244 |
| H  | 1.49851398  | 3.95361440  | -0.99391093 |
| C  | -1.43255079 | 2.07150276  | -0.55295420 |
| O  | -1.28314745 | 1.21280446  | -1.48182396 |
| O  | -2.31651088 | 2.01176704  | 0.34668821  |
| C  | 1.68437278  | 1.97839738  | -0.21594819 |
| O  | 1.65901191  | 2.12133233  | 1.04202555  |
| O  | 2.29544425  | 1.04833507  | -0.82879847 |
| Na | 0.05373913  | -2.02539872 | 0.10075023  |
| O  | 2.24194900  | 0.25841222  | 2.91942604  |
| H  | 2.18788365  | 0.99363190  | 2.25666544  |
| H  | 1.37203971  | 0.26834243  | 3.34235014  |
| O  | -0.57857179 | 1.55321961  | 2.54544080  |
| H  | 0.19163289  | 1.86917837  | 2.02305272  |
| H  | -1.34597056 | 1.85777472  | 2.02185950  |
| O  | 0.83141672  | 0.31950415  | -3.00646523 |
| H  | 1.52671756  | 0.64165110  | -2.38278290 |
| H  | 0.02467412  | 0.70954360  | -2.60216739 |
| O  | -1.79819619 | -1.34210157 | -1.45152079 |
| H  | -1.68246199 | -0.34117385 | -1.42237034 |
| H  | -1.46213318 | -1.62627295 | -2.31018979 |
| O  | 1.73480528  | -3.91484925 | 0.31631356  |
| H  | 1.57030824  | -3.99839031 | -0.63297012 |
| H  | 2.20728433  | -3.06392427 | 0.42096656  |
| O  | -3.63061006 | -0.31616405 | 0.58936842  |
| H  | -3.26249395 | 0.59538929  | 0.43184019  |
| H  | -3.56312660 | -0.75627361 | -0.26945798 |
| O  | 1.24338172  | -2.15709846 | -2.03815604 |
| H  | 1.00955683  | -1.31539968 | -2.51519856 |
| H  | 2.10062956  | -1.95243578 | -1.63984328 |
| O  | -1.23658159 | -1.04751878 | 1.78276739  |
| H  | -2.12785848 | -0.81536401 | 1.43108375  |
| H  | -0.89987886 | -0.20364963 | 2.15783924  |
| O  | -1.96395254 | -3.49460981 | 0.36315125  |
| H  | -1.98581412 | -3.09135912 | 1.24370867  |
| H  | -2.21723878 | -2.77423877 | -0.24173474 |
| O  | 2.28977258  | -1.22603010 | 0.61679254  |
| H  | 2.40249678  | -0.39007553 | 0.08974897  |
| H  | 2.33051732  | -0.91705414 | 1.55037030  |

**10N**

|    |             |             |             |
|----|-------------|-------------|-------------|
| C  | -0.92084801 | -3.89297634 | -0.15077246 |
| H  | -1.20278679 | -3.94215027 | 0.90448250  |
| H  | -1.07188033 | -4.88740650 | -0.59397307 |
| C  | -1.79824704 | -2.88557240 | -0.90540203 |
| H  | -1.46671703 | -2.80811256 | -1.94441262 |
| H  | -2.84343879 | -3.22932837 | -0.91942950 |
| C  | 0.58135817  | -3.55749681 | -0.25063424 |
| O  | 1.00527023  | -3.16940283 | -1.37832952 |
| O  | 1.27517963  | -3.65535724 | 0.80797463  |
| C  | -1.83511520 | -1.47140407 | -0.31956558 |
| O  | -1.54775980 | -1.30542418 | 0.90817505  |
| O  | -2.18524475 | -0.53582830 | -1.10240656 |
| O  | 1.05906633  | -1.24697922 | 1.79287999  |
| H  | 1.27591372  | -2.20757649 | 1.60757006  |
| H  | 0.10479721  | -1.19141967 | 1.55889843  |
| O  | -1.16375843 | 4.38592733  | 0.40754105  |
| H  | -1.83824601 | 3.73842879  | 0.13416105  |
| H  | -0.75499398 | 3.96805374  | 1.18749481  |
| O  | 2.54654330  | 1.81187296  | -0.31305387 |
| H  | 2.68454940  | 1.68059668  | 0.64391906  |
| H  | 2.61246201  | 0.90680761  | -0.68117220 |
| O  | 1.32175526  | 3.04384369  | -2.63623591 |
| H  | 2.07900517  | 2.89674213  | -2.04698852 |
| H  | 0.96113088  | 2.14620567  | -2.77905918 |
| O  | 2.14302101  | -0.87009135 | -0.83223089 |
| H  | 1.95622481  | -1.79653722 | -1.16937400 |
| H  | 1.82335718  | -0.92928278 | 0.09126241  |
| O  | 0.20252269  | 0.55976807  | -2.08615487 |
| H  | -0.65720086 | 0.11061804  | -1.96578517 |
| H  | 0.88168850  | -0.04793296 | -1.70241132 |
| O  | -2.26523315 | 2.08469820  | -0.84254250 |
| H  | -2.49831964 | 2.27468475  | -1.75886043 |
| H  | -2.30715073 | 1.08501868  | -0.77315078 |
| O  | 2.35239847  | 0.93633537  | 2.37595548  |
| H  | 1.91049440  | 0.04800734  | 2.21715926  |
| H  | 2.93491218  | 0.83699575  | 3.13637542  |
| O  | -2.08068964 | 0.78773928  | 2.39398336  |
| H  | -1.95005109 | 0.02679986  | 1.75132903  |
| H  | -2.15167660 | 0.37638165  | 3.26291862  |
| O  | 0.02216583  | 2.36118234  | 1.87386184  |
| H  | -0.73701275 | 1.78508327  | 2.14840992  |
| H  | 0.83762998  | 1.96371585  | 2.23374343  |
| Na | 0.14338204  | 2.42516679  | -0.52700570 |
